# Supplementary material for: Healthcare utilisation, cancer screening and potential barriers to accessing cancer care in rural South West Nigeria: a cross-sectional study
Source: PubMed Central journal article supplement — BMJ Open. 2021 Jul 26;11(7):e040352. doi: 10.1136/bmjopen-2020-040352 (PMC8314695; doi:10.1136/bmjopen-2020-040352), 2021-07-26
Supplement: bmjopen-2020-040352.draft_revisions.pdf [file bmjopen-2020-040352.draft_revisions.pdf]

# BMJ Open

BMJ Open is committed to open peer review. As part of this commitment we make the peer review history of every article we publish publicly available.

When an article is published we post the peer reviewers' comments and the authors' responses online. We also post the versions of the paper that were used during peer review. These are the versions that the peer review comments apply to.

The versions of the paper that follow are the versions that were submitted during the peer review process. They are not the versions of record or the final published versions. They should not be cited or distributed as the published version of this manuscript.

BMJ Open is an open access journal and the full, final, typeset and author-corrected version of record of the manuscript is available on our site with no access controls, subscription charges or pay-per-view fees (<http://bmjopen.bmj.com>).

If you have any questions on BMJ Open's open peer review process please email [info.bmjopen@bmj.com](mailto:info.bmjopen@bmj.com)

# BMJ Open

## Universal healthcare coverage, cancer screening and potential barriers to accessing cancer care in Sub-Saharan Africa: The results and implications of a Cross-sectional Community Study in Rural South-West Nigeria

|                               |                                                                                                                                                                                                                                                                                                                                                                                                                                                                                                                                                                                                                                                                                                                                                                                                                                |
|-------------------------------|--------------------------------------------------------------------------------------------------------------------------------------------------------------------------------------------------------------------------------------------------------------------------------------------------------------------------------------------------------------------------------------------------------------------------------------------------------------------------------------------------------------------------------------------------------------------------------------------------------------------------------------------------------------------------------------------------------------------------------------------------------------------------------------------------------------------------------|
| Journal:                      | <i>BMJ Open</i>                                                                                                                                                                                                                                                                                                                                                                                                                                                                                                                                                                                                                                                                                                                                                                                                                |
| Manuscript ID                 | bmjopen-2020-040352                                                                                                                                                                                                                                                                                                                                                                                                                                                                                                                                                                                                                                                                                                                                                                                                            |
| Article Type:                 | Original research                                                                                                                                                                                                                                                                                                                                                                                                                                                                                                                                                                                                                                                                                                                                                                                                              |
| Date Submitted by the Author: | 12-May-2020                                                                                                                                                                                                                                                                                                                                                                                                                                                                                                                                                                                                                                                                                                                                                                                                                    |
| Complete List of Authors:     | Sharma, Avinash; Memorial Sloan Kettering Cancer Center, Surgery<br>Alatise, Olusegun; Obafemi Awolowo University Teaching Hospital Complex<br>O'Connell, Kelli; Memorial Sloan Kettering Cancer Center, Epidemiology and Biostatistics<br>Gbenga, Ogunleye; Obafemi Awolowo University Teaching Hospital Complex, Surgery<br>Aderounmu, Adewale; Obafemi Awolowo University Teaching Hospital Complex, Surgery<br>Samson, Marquerite; Memorial Sloan Kettering Cancer Center, Epidemiology and Biostatistics<br>Wuraola, Funmilola; Obafemi Awolowo University Teaching Hospital Complex<br>Olasehinde, Olalekan; Obafemi Awolowo University Teaching Hospital Complex<br>Kingham, T; Memorial Sloan Kettering Cancer Center, Surgery<br>Du, Mengmeng; Memorial Sloan Kettering Cancer Center, Epidemiology and Biostatistics |
| Keywords:                     | PUBLIC HEALTH, PREVENTIVE MEDICINE, Epidemiology < ONCOLOGY, Health policy < HEALTH SERVICES ADMINISTRATION & MANAGEMENT, Organisation of health services < HEALTH SERVICES ADMINISTRATION & MANAGEMENT, Health economics < HEALTH SERVICES ADMINISTRATION & MANAGEMENT                                                                                                                                                                                                                                                                                                                                                                                                                                                                                                                                                        |
|                               |                                                                                                                                                                                                                                                                                                                                                                                                                                                                                                                                                                                                                                                                                                                                                                                                                                |

SCHOLARONE™  
Manuscripts

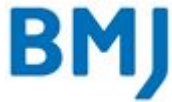

I, the Submitting Author has the right to grant and does grant on behalf of all authors of the Work (as defined in the below author licence), an exclusive licence and/or a non-exclusive licence for contributions from authors who are: i) UK Crown employees; ii) where BMJ has agreed a CC-BY licence shall apply, and/or iii) in accordance with the terms applicable for US Federal Government officers or employees acting as part of their official duties; on a worldwide, perpetual, irrevocable, royalty-free basis to BMJ Publishing Group Ltd ("BMJ") its licensees and where the relevant Journal is co-owned by BMJ to the co-owners of the Journal, to publish the Work in this journal and any other BMJ products and to exploit all rights, as set out in our [licence](#).

The Submitting Author accepts and understands that any supply made under these terms is made by BMJ to the Submitting Author unless you are acting as an employee on behalf of your employer or a postgraduate student of an affiliated institution which is paying any applicable article publishing charge ("APC") for Open Access articles. Where the Submitting Author wishes to make the Work available on an Open Access basis (and intends to pay the relevant APC), the terms of reuse of such Open Access shall be governed by a Creative Commons licence – details of these licences and which [Creative Commons](#) licence will apply to this Work are set out in our licence referred to above.

Other than as permitted in any relevant BMJ Author's Self Archiving Policies, I confirm this Work has not been accepted for publication elsewhere, is not being considered for publication elsewhere and does not duplicate material already published. I confirm all authors consent to publication of this Work and authorise the granting of this licence.

1  
2  
3 Universal healthcare coverage, cancer screening and potential barriers to accessing  
4 cancer care in Sub-Saharan Africa: The results and implications of a Cross-sectional  
5  
6  
7  
8 Community Study in Rural South-West Nigeria  
9  
10  
11  
12  
13

14 Sharma A. MD<sup>1</sup>, Alatise O. I. MBChB<sup>2</sup>, O'Connell K. MSc<sup>3</sup>, Gbenga O.S. MSc<sup>2</sup>,  
15  
16 Aderounmu A.A. MBChB<sup>2</sup>, Samson. M.L. BSc<sup>3</sup>, Wuraola F. MBChB<sup>2</sup>, Olasehinde O.  
17  
18 MBChB, Kingham T.P MD<sup>1</sup>, Du M. ScD<sup>3</sup>  
19  
20  
21  
22  
23

24 <sup>1</sup>Department of Surgery, Memorial Sloan Kettering Cancer Center, New York, NY;  
25  
26 <sup>2</sup>Obafemi Awolowo University, Ile-Ife, Nigeria; <sup>3</sup>Department of Epidemiology and  
27  
28 Biostatistics, Memorial Sloan Kettering Cancer Center, New York, NY. African  
29  
30 Research Group for Oncology (ARGO).  
31  
32  
33  
34

35 **Acknowledgments:** The authors would like to acknowledge the dedicated research  
36  
37 team at OAUTHC for their efforts in this project, the local community leaders and  
38  
39 healthcare workers, as well as the support from Prof. Adesgun Fatusi and his research  
40  
41 staff.  
42  
43  
44  
45  
46

47 **Funding:** This research was conducted with the support of the African Research  
48  
49 Group for Oncology (ARGO) consortium. The consortium was initiated using a pilot  
50  
51 grant funding from the National Cancer Institute's Center for Global Health to perform  
52  
53 dedicated cancer research in the region. This research was funded in part through the  
54  
55 NIH/NCI Cancer Center Support Grant P30 CA008748.  
56  
57  
58  
59  
60

1  
2  
3 **Correspondence:**  
4

5 Avinash Sharma  
6

7  
8 Memorial Sloan Kettering Cancer Center  
9

10 1275 York Avenue, C-886  
11

12 New York, NY 10065  
13

14 [avinash.s.sharma@gmail.com](mailto:avinash.s.sharma@gmail.com)  
15  
16

17  
18  
19 **Conflicts of Interest:** None to declare  
20  
21  
22  
23  
24  
25  
26  
27  
28  
29  
30  
31  
32  
33  
34  
35  
36  
37  
38  
39  
40  
41  
42  
43  
44  
45  
46  
47  
48  
49  
50  
51  
52  
53  
54  
55  
56  
57  
58  
59  
60

For peer review only

**Author contributions:**1. **Avinash Sharma**

Author contributions: Initial conception, study and questionnaire design, data collection, data analysis, manuscript writing

2. **O.I. Alatise**

Author contribution: Initial conception, study and questionnaire design, manuscript revision

3. **K. O'Connell**

Author contributions: Data and statistical analysis, questionnaire design, manuscript revision

4. **O.S. Gbenga**

Author contributions: study organisation, data collection

5. **A.A. Aderounmu**

Author contributions: study organisation, data collection

6. **M.L.Samson**

Author contributions: study and questionnaire design

7. **F. Wuraola**

Author contributions: Manuscript revision

8. **O. Olasehinde**

Author contributions: study design, data collection, manuscript revision

9. **T.P. Kingham**

Author contributions: Initial conception, study design, overall supervision, manuscript revision

10. **M. Du**

Author contributions: Initial conception, study and questionnaire design, overall supervision, manuscript revision

1  
2  
3  
4  
5  
6  
7  
8  
9  
10  
11  
12  
13  
14  
15  
16  
17  
18  
19  
20  
21  
22  
23  
24  
25  
26  
27  
28  
29  
30  
31  
32  
33  
34  
35  
36  
37  
38  
39  
40  
41  
42  
43  
44  
45  
46  
47  
48  
49  
50  
51  
52  
53  
54  
55  
56  
57  
58  
59  
60

For peer review only

## ABSTRACT

**Background/Aims:** Cancer burden is predicted to double by 2030 in sub-Saharan Africa. Accordingly, access to healthcare services for cancer management has been made a priority in the region. In Nigeria, the National Cancer Control Plan aims to ensure greater than 50% cancer screening of eligible populations by 2022 for all Nigerians. This study sought to describe current healthcare utilization, cancer screening activities and potential barriers to accessing cancer care within a rural community-based adult population in South-West Nigeria.

**Methods:** During April 2018, a cross-sectional study of community-based adults (>18 years) was conducted approximately 130 kilometers east of Ibadan, 250 km from Lagos in Osun State, South-West Nigeria. Participants completed a face-to-face survey in local dialect. A validated questionnaire was used to assess demographics, health status, income, medical expenditures, doctor visits, and cancer screening history.

**Results:** A total of 346 individuals were enrolled; the median age was 52 years, and 75% of participants were female. Of the entire cohort, only 4% had medical insurance,. 46% reported a major medical cost in the last year. Cancer screening activities were infrequent, with 1.5% of participants reporting having cervical cancer screening and 3.3% of participants >40 years having a mammogram. Colonoscopy screening in those >50 years was 5%. Cancer screening assessment was less frequent in those with less income and lower levels of education. Despite this, we observed that most individuals had contact with a primary health care doctor (52% in the last year), and over 70% access to radio and TV suggesting the opportunity to expand community-based screening interventions and awareness exist.



1  
2  
3 **Conclusions:** Despite expected increases in cancer cases, our data highlight a  
4 deficiency in cancer screening and lack of universal healthcare coverage within a  
5 community-based adult Nigerian population. Increasing financial risk protection,  
6 awareness, and targeted resource allocation may help expand access.  
7  
8  
9  
10  
11  
12

13  
14  
15 **Keywords:** Non-communicable disease, Sub-Saharan Africa, Cancer, Universal  
16 Healthcare, Screening  
17  
18  
19  
20

### 21 **Strengths and Limitations of the study:**

22  
23  
24  
25

- 26 1) The study provided a contemporary perspective potential barriers to accessing  
27 medical and cancer care in rural South-West Nigeria. Recruitment and data  
28 collection performed by interviewers fluent in the local dialect who underwent a  
29 systematic and rigorous two-day training program.  
30  
31  
32  
33  
34  
35  
36  
37
- 38 2) Questionnaire tailored to the local population and developed in collaboration  
39 with local clinicians, epidemiologists, and nutritionists. Questionnaire items  
40 derived by adapting features from validated and/or widely implemented local or  
41 nationwide surveys.  
42  
43  
44  
45  
46  
47  
48
- 49 3) Study conducted in conjunction with local community healthcare workers and  
50 the regional tertiary referral hospital to help build capacity, increase healthcare  
51 awareness, and establish a sustained relationship with these rural  
52 communities.  
53  
54  
55  
56  
57  
58  
59  
60

- 1  
2  
3  
4  
5  
6  
7  
8  
9  
10  
11  
12  
13  
14  
15  
16  
17  
18  
19  
20  
21  
22  
23  
24  
25  
26  
27  
28  
29  
30  
31  
32  
33  
34  
35  
36  
37  
38  
39  
40  
41  
42  
43  
44  
45  
46  
47  
48  
49  
50  
51  
52  
53  
54  
55  
56  
57  
58  
59  
60
- 4) Potential for measurement error or recall bias, as we relied on individuals to retrospectively describe their own health and socioeconomic status as well as their interactions with healthcare services.
  - 5) Survey conducted at a single time (mid-week, during the day), which may have affected sample composition (e.g., more females than males).

## INTRODUCTION

The burden of non-communicable disease (NCD), in particular cancer, in sub-Saharan Africa is well documented.<sup>1-3</sup> According to recent International Agency for Research on Cancer GLOBOCAN estimates, by 2030, 75% of new cancer cases will be within low and middle-income countries.<sup>4,5</sup> In sub-Saharan Africa, despite the fact that cancer burden is predicted to double by 2030, the entire region accounts for <1% of worldwide medical cancer expenditures.<sup>6-8</sup> Central to addressing the growing burden of cancer in sub-Saharan Africa is the need to improve access to cancer care services for screening, prevention, and treatment.<sup>9</sup>

NCDs, including cancer, threaten to overwhelm fragile health systems in sub-Saharan Africa and lead to dramatic rises in health and social care costs in the near-term.<sup>7, 10</sup> In the region, out-of-pocket health expenditures are a major contributor to poverty<sup>11-13</sup>, and a lack of adequate social protection has the potential to drive families and individuals further into poverty. In Nigeria, universal healthcare coverage in the form of the National Health Insurance Scheme (NHIS) was implemented in 2005, with an overarching goal of universal health coverage for all Nigerians.<sup>14</sup> However, uptake has been limited and restricted,<sup>15</sup> and as a result, the large majority of Nigerians still face significant financial burden when healthcare needs arise.<sup>15, 16</sup>

In Nigeria cancer incidence and mortality is increasing and women have a higher cancer incidence than men.<sup>17</sup> The most common forms of cancer in Nigeria are breast and cervical, with these accounting for over 50 percent of cancer deaths.<sup>17-19</sup> Regionally, the need to improve access to cancer services for early detection has been recognised, with a focus on these cancers. In 2018, Nigeria launched the “National

1  
2  
3 Cancer Control Plan 2018-2022,” with the goal to make screening services available  
4 for all Nigerians, and at least “greater than 50% screening of all eligible populations  
5 by 2022.”<sup>20</sup> Despite this, the current state of cancer screening and barriers to care in  
6 this region (esp. rural areas) are not well-defined. This gap limits our ability to define  
7 actionable steps towards improving access and achieving the established screening  
8 goal. In addition, with 50 percent of Nigeria’s population living in rural areas<sup>21</sup> we  
9 hypothesize that unique challenges may exist for individuals in these communities,  
10 where nationwide initiatives may have limited reach.  
11  
12  
13  
14  
15  
16  
17  
18  
19  
20  
21  
22  
23

24 This study aimed to describe potential barriers to accessing cancer care within a rural  
25 community-based adult population in South-West Nigeria. This study was performed  
26 as part of a broader community-based capacity building project in South-West  
27 Nigeria<sup>22</sup> investigating potentially modifiable cancer risk factors in the setting of rising  
28 rates of cancer in the region.<sup>6 19 20 23</sup> Herein, we report health insurance coverage and  
29 socioeconomic status in relation to health conditions, health expenditures, cancer  
30 screening assessment and provide a snapshot of the health needs and burden faced  
31 by individuals in the region.  
32  
33  
34  
35  
36  
37  
38  
39  
40  
41  
42  
43  
44  
45  
46  
47  
48  
49  
50  
51  
52  
53  
54  
55  
56  
57  
58  
59  
60

## METHODS

During April 2018, a cross-sectional study of community-based adults was conducted in Osun State, South-West Nigeria. Two rural towns Ijebu-Jesa and Ere-Jesa, (approximately 130 kilometers east of Ibadan, 250 km from Lagos, on latitude 7.45 degrees north within the rain forest belt), were selected at random. These towns were in proximity to Obafemi Awolowo University Teaching Hospital Complex, Ile-Ife, the

1  
2  
3 main tertiary referral center in the region. The study was approved by the Obafemi  
4  
5 Awolowo University institutional ethics review committee.  
6  
7  
8  
9

### 10 *Patient and Public Involvement*

11  
12 Prior to the study, local community leaders in the towns were contacted, and the goals  
13  
14 of the research were explained. In the time leading up to the study, healthcare workers  
15  
16 and community leaders notified and mobilized potential participants in the two  
17  
18 communities. They were also involved in the design of the study and in disseminating  
19  
20 the results to all participants. Adult participants were consecutively enrolled upon  
21  
22 arrival at pre-designated locations (main town hall) in the two towns. Based on the  
23  
24 resource capacity of each town hall and the size of each community, enrolment was  
25  
26 to be capped at a maximum of 300 participants at Ijebu-Jesa and 100 at Ere-Jesa. All  
27  
28 study participants received blood pressure checks, and health promotion talks were  
29  
30 held for those waiting to be surveyed. Study participants were given a small stipend to  
31  
32 cover their transportation costs to the study venue on the study day (300 Naira, ~80  
33  
34 US cents). This amount was determined by local healthcare workers.  
35  
36  
37  
38  
39  
40  
41

42 After obtaining informed consent, the study participants underwent a 50-60 minute  
43  
44 one-on-one, face-to-face survey conducted in the local Yoruba dialect by a trained  
45  
46 research assistant. All research assistants underwent a two-day training program that  
47  
48 involved education in the research aims, methodology, and ethics as well as interview  
49  
50 techniques and the use of electronic tablets for recording data. The survey consisted  
51  
52 of a questionnaire to gather quantitative data on demographics, health status, income,  
53  
54 medical expenditures, dietary habits, physical activity, family history, screening  
55  
56 history, medical history, reproductive history, primary healthcare visits, medication  
57  
58  
59  
60

1  
2  
3 use, and environmental exposures. Cancer screening activities in screen-eligible  
4 individuals included history of cervical examination and screening test in women >21  
5  
6 years, mammogram in women >40 years, and colonoscopy in all individuals >50  
7  
8 years. Because cervical cancer screening intervention was self-reported, screening  
9  
10 could be by pap smear or visual inspection with acetic acid or Lugo's iodine (VIA/VILI).  
11  
12 This could be conducted in a primary healthcare setting. Manual breast examination  
13  
14 by a health care worker was not captured and therefore the assessed intervention  
15  
16 evaluated management at local secondary and tertiary health care facilities. All of the  
17  
18 assessed interventions were screening activities specified as part of the Nigerian  
19  
20 National Cancer Control Plan 2018-2022. Medical expenses were defined as any  
21  
22 'major medical costs' as perceived by the study participant on direct questioning. This  
23  
24 was clarified by recording the amount spent in Naira, and the medical reason for the  
25  
26 expenditure was also documented. The questionnaire, developed in collaboration with  
27  
28 local clinicians, epidemiologists, and nutritionists, was derived by adapting features  
29  
30 from validated and/or widely implemented local or nationwide surveys. This included  
31  
32 the Nigeria Demographic and Health Survey,<sup>24</sup> Nigeria General Household Survey,<sup>25</sup>  
33  
34 World Health Organization-endorsed Global Physical Activity Questionnaire,<sup>26</sup> and the  
35  
36 Nurses' Health Study questionnaire.<sup>27-30</sup> Demographic and socioeconomic data  
37  
38 collected from our study population were compared to data from the Nigerian  
39  
40 Demographic and Health Survey and the Oxford Poverty Health Indicator <sup>31 32</sup> to  
41  
42 assess external validity.  
43  
44  
45  
46  
47  
48  
49  
50  
51  
52  
53  
54  
55

### 56 *Statistical analysis*

57  
58  
59  
60

Data were summarized in the form of proportions and frequency tables for categorical variables. Continuous variables were summarized using mean, median, and standard deviation. Comparisons of discrete variables were computed using Fisher's exact test and multiple logistic regression. All analyses were conducted using SAS software version 9.4 (SAS Institute Inc., Cary, NC)

## RESULTS

A total of 346 individuals were consecutively enrolled in the study and interviewed. Enrolment was capped at this number to ensure complete surveys could be conducted for all individuals. The demographic features of the group are presented in **Table 1**. The majority of participants were Yoruba speaking (n=332, 96%) and married (n=213, 62%) with a median age of 52 years. Females accounted for 75% of the cohort (n=261). Most individuals had some form of education, with 166 participants (48%) reporting more than primary school education. In addition, 30 participants (9%) reported being unemployed. Of female participants, 70% had  $\geq 4$  live births.

**Table 1: Demographic characteristics of the study group (n=346)**

(n=268 Ijebu-Jesa, n=68 Ere-Jesa)

| Variable                         | n (%)       |
|----------------------------------|-------------|
| <b>Median Age, years (range)</b> | 52 (18-100) |
| <b>Sex</b>                       |             |
| Male                             | 85 (24.6)   |
| Female                           | 261 (75.4)  |
| <b>Marital Status</b>            |             |
| Single                           | 27 (7.8)    |
| Married                          | 213 (61.6)  |
| Other (Divorced/cohabiting)      | 106 (30.6)  |
| <b>Tribe</b>                     |             |
| Yoruba                           | 332 (96.0)  |
| Ibo                              | 5 (1.4)     |

|                                               |                      |            |
|-----------------------------------------------|----------------------|------------|
|                                               | Other                | 9 (2.6)    |
| <b>Religion</b>                               | Christian            | 326 (94.2) |
|                                               | Muslim               | 19 (5.5)   |
|                                               | Other                | 1 (0.3)    |
| <b>Education</b>                              | No formal education  | 88 (25.4)  |
|                                               | Primary              | 92 (26.6)  |
|                                               | Secondary            | 92 (26.6)  |
|                                               | Vocational/Technical | 45 (13.0)  |
|                                               | Higher               | 29 (8.4)   |
| <b>Occupation</b>                             | Unemployed           | 30 (8.7)   |
|                                               | Civil servant        | 30 (8.7)   |
|                                               | Trader               | 123 (35.5) |
|                                               | Farmer               | 35 (10.1)  |
|                                               | Self-employed        | 80 (23.1)  |
|                                               | Other                | 48 (13.9)  |
| <b>Number of Live Births (Females, n=242)</b> | 0                    | 6 (2.5)    |
|                                               | 1                    | 15 (6.2)   |
|                                               | 2                    | 23 (9.5)   |
|                                               | 3                    | 28 (11.6)  |
|                                               | 4                    | 54 (22.3)  |
|                                               | 5 or more            | 116 (47.9) |

Overall, 155 participants (45%) had a personal monthly income of <10,000 Naira (~1 USD per day), and 134 individuals (76%) had a family monthly income of <50,000 Naira (140 USD per month) (**Table 2a**). In addition, 198 participants (57%) lived in a family home or owned an apartment. The majority of participants (92%) reported having access to electricity, and over 70% reported access to television (76%) or radio (73%).

To assess the comparability of our results to the general Nigerian population, we compared the data from our study population to that recorded in the Nigerian Demographic and Health Survey (**Table 2b**).<sup>31</sup> Both groups had similar degrees of



education at the primary level for males and females, but overall there were fewer uneducated males and females within our surveyed population when compared to national averages. Our surveyed group also had better access to electricity, radio, and television compared to the national survey group (rural). When compared to equivalent parameters for Nigeria from the multi-dimensional poverty index (MPI) developed by the Oxford Poverty and Human Development Initiative,<sup>32</sup> our study population had similar levels of deprivation for years of schooling (defined as <6 years of school) and electricity (defined as no household electricity).

**Table 2a: Income and household conditions**

| Variable                                     | n (%)      |
|----------------------------------------------|------------|
| <b>Personal income (per month, in Naira)</b> |            |
| <10,000                                      | 155 (44.8) |
| 10,000-49,999                                | 139 (40.2) |
| 50,000-99,999                                | 26 (7.5)   |
| 100,000-249,999                              | 16 (4.6)   |
| 250,000-499,999                              | 9 (2.6)    |
| ≥500,000                                     | 1 (0.3)    |
| <b>Family income (per month, in Naira)</b>   |            |
| <10,000                                      | 117 (33.8) |
| 10,000-49,999                                | 147 (42.5) |
| 50,000-99,999                                | 38 (11.0)  |
| 100,000-249,999                              | 28 (8.1)   |
| 250,000-499,999                              | 11 (3.2)   |
| ≥500,000                                     | 5 (1.4)    |
| <b>Type of dwelling</b>                      |            |
| Own apartment                                | 131 (37.9) |
| Rent apartment                               | 146 (42.2) |
| Family house                                 | 67 (19.4)  |
| Other                                        | 2 (0.6)    |
| <b>Type of toilet</b>                        |            |
| Water system                                 | 151 (43.6) |
| Pit latrine                                  | 164 (47.4) |
| Bush                                         | 23 (6.6)   |
| Bucket                                       | 7 (2.0)    |
| Other                                        | 1 (0.3)    |
| <b>Water source</b>                          |            |
| Pipe borne/boreholes                         | 185 (53.5) |

|                   |                   |            |
|-------------------|-------------------|------------|
|                   | Well              | 146 (42.2) |
|                   | River             | 15 (4.3)   |
| <b>Appliances</b> |                   |            |
|                   | Electricity       | 318 (91.9) |
|                   | Television        | 262 (75.7) |
|                   | Radio             | 251 (72.5) |
|                   | Refrigerator      | 154 (44.5) |
|                   | Air conditioner   | 8 (2.3)    |
|                   | Generating set    | 99 (28.6)  |
|                   | Personal computer | 38 (11.0)  |
|                   | None              | 18 (5.2)   |

**Table 2b: Comparison between study sample characteristics and 2013 Nigerian National Demographic and Health Survey (NDHS)**

|                                            | NDHS Urban (%)         | NDHS Rural (%)       | NDHS Total (%)                  | Current study (%)             |
|--------------------------------------------|------------------------|----------------------|---------------------------------|-------------------------------|
| <b>Cooking Fuel</b>                        |                        |                      |                                 |                               |
| Electricity                                | 0.7                    | 0.2                  | 0.4                             | 10.7                          |
| Liquefied petroleum gas/natural Gas/biogas | 4.6                    | 0.5                  | 2.3                             | 21.1                          |
| Kerosene                                   | 47.6                   | 8.7                  | 25.5                            | 31.8                          |
| Charcoal                                   | 5.3                    | 1.6                  | 3.2                             | 2.3                           |
| Wood                                       | 37.9                   | 83.3                 | 63.7                            | 34.1                          |
| <b>Electricity</b>                         |                        |                      |                                 |                               |
| Yes                                        | 83.6                   | 34.4                 | 55.6                            | 91.9                          |
| No                                         | 16.3                   | 65.4                 | 44.2                            | 8.1                           |
| Missing                                    | 0.1                    | 0.2                  | 0.2                             | 0                             |
| <b>Household Appliances</b>                |                        |                      |                                 |                               |
| Radio                                      | 77.7                   | 61.3                 | 68.3                            | 72.5                          |
| Television                                 | 73.2                   | 28.2                 | 47.6                            | 75.7                          |
| Refrigerator                               | 32.5                   | 7.5                  | 18.3                            | 44.5                          |
| <b>Means of Transportation</b>             |                        |                      |                                 |                               |
| Bicycle                                    | 12.7                   | 18.3                 | 18.3                            | 0.9                           |
| Motorcycle/scooter                         | 27.0                   | 31.2                 | 31.2                            | 15.0                          |
| Car/truck                                  | 14.4                   | 8.7                  | 8.7                             | 12.1                          |
| <b>Education</b>                           | <b>NDHS Female (%)</b> | <b>NDHS Male (%)</b> | <b>Current study Female (%)</b> | <b>Current study Male (%)</b> |
| No formal education                        | 37.8                   | 21.2                 | 28.7                            | 15.3                          |
| Primary                                    | 17.3                   | 16.7                 | 26.8                            | 25.9                          |
| Secondary                                  | 35.8                   | 47.7                 | 28.0                            | 22.4                          |
| More than secondary                        | 9.1                    | 14.3                 | 16.5                            | 36.5                          |

Within the group surveyed, cancer screening/assessment activities were limited: 2% (4/267) of female participants had a previous cervical smear/assessment, and 3%

(6/182) of females >40 years had ever had a mammogram (**Table 3**). The prevalence of colonoscopy screening in those >50 years was 5% (9/200). In terms of healthcare access, 180 individuals (52%) had seen a primary healthcare doctor in the last year and were less likely to see a traditional healer during this period. Of all participants, 110 reported being diagnosed with hypertension (32%), but most individuals were not on daily hypertensive medication (n=324, 94%). The use of other medications for primary prevention of NCDs, such as aspirin and anti-cholesterol medications, was also infrequent.

**Table 3: Screening activities, access to medical services, and health conditions**

| Variable                                                | n (%)      |
|---------------------------------------------------------|------------|
| <b>Cancer screening</b>                                 |            |
| Cervical Cancer assessment<br>(if female > 21, n = 261) | 4 (1.5)    |
| Previous mammogram (if<br>female >40, n = 183)          | 6 (3.3)    |
| Previous colonoscopy (if >50<br>years, n = 190)         | 9 (4.5)    |
| <b>Last primary health care physician<br/>visit</b>     |            |
| <1 year ago                                             | 180 (52.0) |
| 1-4 years ago                                           | 93 (26.9)  |
| 5-10 years ago                                          | 32 (9.2)   |
| >10 years ago                                           | 41 (11.8)  |
| <b>Last time seen traditional healer</b>                |            |
| Never                                                   | 254 (73.4) |
| <2 years ago                                            | 66 (19.1)  |
| ≥2 years ago                                            | 26 (7.5)   |
| <b>Hypertension</b>                                     | 110 (31.8) |
| <b>Diabetes</b>                                         | 16 (4.6)   |
| <b>High cholesterol</b>                                 | 24 (6.9)   |
| <b>Stroke</b>                                           | 18 (5.2)   |
| <b>Alcohol use*</b>                                     |            |
| No                                                      | 227 (65.6) |
| Yes, drank in past, but quit                            | 65 (18.8)  |
| Yes, currently drink alcohol                            | 54 (15.6)  |
| <b>Smoking status*</b>                                  |            |
| Never                                                   | 303 (87.6) |
| Ever                                                    | 43 (12.4)  |
| <b>Medication use</b>                                   |            |

|                                |            |
|--------------------------------|------------|
| Reported anti-hypertensive use | 78 (22.5)  |
| Reported aspirin use           | 89 (25.7)  |
| Reported anti-cholesterol use  | 7 (2.0)    |
| Reported herbal supplement use | 233 (67.3) |
| Oral contraceptive use         |            |
| Never                          | 175 (67.0) |
| Past use                       | 64 (24.5)  |
| Current use                    | 22 (8.4)   |

\* Participants were asked "Have you had 10 or more drinks of alcohol in your life?"

\* Participants were asked "Have you smoked 5 packs of cigarettes (100) or more in your lifetime?"

Only 15 individuals out of 346 (4%) had medical insurance (**Table 4**). For the remaining uninsured participants, 66% reported that they were unaware that health insurance existed. A further 73 participants (22%) stated that insurance was too difficult to access. Despite this, nearly half of those surveyed (n=160, 46%) reported a major medical cost in the last year, with the majority from unforeseen events, such as acute illness, trauma, or surgery (58%). The costs incurred ranged from 5000-1,500,000 Naira, with a median of 10,000 Naira, an amount that is more than the monthly income for ~45% of individuals in this study. In addition, 52 participants (33%) reported that their major medical costs were for chronic conditions. Overall individuals, with incomes in the lowest brackets (<50,000 Naira), accounted for most of those that incurred major medical costs in the last two years (74.4%), had more visits to their primary care doctor in the year (75.6%), and higher levels of hypertension (80.4%).

**Table 4: Insurance coverage and medical costs**

| Variable                        | n (%) |            |
|---------------------------------|-------|------------|
| <b>Insurance</b>                | No    | 331 (95.7) |
|                                 | Yes   | 15 (4.3)   |
| <b>Last time used insurance</b> |       |            |

|                                                     |                         |                        |
|-----------------------------------------------------|-------------------------|------------------------|
|                                                     | In the last 2 years     | 6 (40.0)               |
|                                                     | >2 years ago            | 9 (60.0)               |
| <b>How many family members covered by insurance</b> |                         |                        |
|                                                     | None                    | 331 (95.7)             |
|                                                     | 1-2                     | 8 (2.3)                |
|                                                     | 3-4                     | 3 (0.9)                |
|                                                     | 5 or more               | 4 (1.2)                |
| <b>Reasons for not having insurance (n=331)</b>     |                         |                        |
|                                                     | Expense                 | 32 (9.7)               |
|                                                     | Lack of coverage        | 13 (3.9)               |
|                                                     | Too difficult to access | 73 (22.1)              |
|                                                     | Other                   | 217 (65.6)             |
| <b>Major medical costs in the last 2 years</b>      |                         |                        |
|                                                     | No                      | 186 (53.8)             |
|                                                     | Yes                     | 160 (46.2)             |
| <b>Estimated amount</b>                             |                         |                        |
|                                                     | <10,000 Naira           | 73 (45.6)              |
|                                                     | 10,000-49,000 Naira     | 38 (23.8)              |
|                                                     | 50,000-99,999 Naira     | 16 (10.0)              |
|                                                     | >100,000 Naira          | 22 (13.8)              |
|                                                     | Unknown                 | 11 (6.9)               |
| <b>Reasons for major medical costs (n=158)</b>      |                         |                        |
|                                                     | Surgery                 | 17 (10.8)              |
|                                                     | Chronic conditions      | 52 (32.9)              |
|                                                     | Acute illness/trauma    | 74 (46.8)              |
|                                                     | Other/multiple reasons  | 15 (9.5)               |
| <b>Amount spent (continuous)</b>                    |                         |                        |
|                                                     | Overall median (range)  | 10,000 (50-1,500,000)  |
| <b>Median amount spent by reason (range)</b>        |                         |                        |
|                                                     | Surgery                 | 60,000 (7,000-150,000) |
|                                                     | Chronic conditions      | 18,000 (500-150,000)   |
|                                                     | Acute illness/trauma    | 5,000 (50-400,000)     |
|                                                     | Other/multiple reasons  | 70,000 (800-500,000)   |

Within eligible populations, we performed analysis to look for the association between cancer screening activity and income, insurance status and education **Table 5**. Individuals with lower levels of income were less likely to have had cancer screening assessments. Cancer screening activity was more frequent in those with higher levels

of education. No significant relationship was observed by insurance status or other factors that were assessed. In a multivariate logistic regression model including personal income, insurance status and education, the only statistically significant odds ratio for association with cancer screening activity was observed for personal income (personal income OR 2.7 95%CI 1.3-5.7  $p < 0.01$ , education level OR 1.7 95%CI 0.98-2.7  $p = 0.06$ , insurance status OR 4.3 95%CI 0.8-23.1  $p = 0.09$ ).

**Table 5: Association between Cancer Screening Activity and Income, Insurance and Education N =310\***

| Variable                                     | Cancer Screening (N=17) | No Cancer Screening (N=293) | P value* |
|----------------------------------------------|-------------------------|-----------------------------|----------|
| <b>Personal income (per month, in Naira)</b> |                         |                             |          |
| <10,000                                      | 2/138 (1.5)             | 140/138 (98.5)              | <0.01    |
| 10,000-49,999                                | 9/122 (7.4)             | 115/122 (92.6)              |          |
| >50,000                                      | 6/43 (14.0)             | 38/43 (86.0)                |          |
| <b>Family income (per month, in Naira)</b>   |                         |                             |          |
| <10,000                                      | 1/108 (0.9)             | 107/108 (99.1)              | <0.01    |
| 10,000-49,999                                | 8/129 (6.2)             | 121/129 (93.8)              |          |
| >50,000                                      | 8/66 (12.1)             | 58/66 (87.9)                |          |
| <b>Insurance Status</b>                      |                         |                             |          |
| No                                           | 15/290 (5.2)            | 275/290 (94.8)              | 0.12     |
| Yes                                          | 2/13 (15.4)             | 11/13 (84.6)                |          |
| <b>Education</b>                             |                         |                             |          |
| No formal education                          | 1/86 (1.2)              | 85/86 (98.8)                | 0.04     |
| Primary                                      | 3/83 (3.6)              | 80/83 (96.4)                |          |
| Secondary                                    | 8/78 (10.3)             | 70/78 (89.7)                |          |
| Higher                                       | 5/56 (8.9)              | 51/56 (91.1)                |          |

No association by Gender, Marital Status, Religion

\* Adjusted for eligible population, whereby cancer screening activities defined as history of cervical assessment in women >21 years, mammogram in women >40 years, and colonoscopy in all individuals >50 years

\* Fisher's exact test for association

## DISCUSSION

We performed a cross-sectional community-based study in Osun state, Nigeria to provide a snapshot of the challenges faced in the management of NCDs in the region.

This study was conducted with an emphasis on cancer within broader research aims of identifying risk factors (lifestyle, diet, biological) associated with the rising cancer incidence in the region. We observed that screening assessment for breast, cervical, and colon cancer (the major contributors to cancer morbidity in the region),<sup>6 19 33</sup> were extremely low. This observation was despite a median age of 52 years and a high representation of females. In addition, <5% of the surveyed population possessed universal health care in the form of health insurance. We also found low incomes, high fertility rates, and evidence of poorly controlled chronic diseases, such as hypertension, in our cohort. The rates are comparable to national averages (suggesting our sample sits between the urban/rural divide)<sup>31</sup> and likely represent broad health and development deficiencies present in the community.

Previous studies conducted in the region<sup>34-42</sup> have demonstrated that poor access to cancer services is associated with late presentation and high incidence/mortality ratio.<sup>5 43</sup> This highlights a need to develop sound health infrastructure, whereby individuals can be screened for asymptomatic disease and also adequately access services in a timely fashion when symptomatic. Our study identifies that screening activities may be lacking and that the potential cost implications of accessing treatment when symptoms arise, in the absence of adequate health insurance, can be high. The experience from other sub-Saharan African nations suggests that individuals seeking cancer services face significant barriers to access.<sup>35 36 44-47</sup> The Nigerian "National Cancer Control Plan 2018-2022," specifically details goals to make screening services

1  
2  
3 and early detection of cancer available for all Nigerians, and to improve access to  
4 quality, cost-effective, and equitable diagnostic and treatment services for cancer  
5 care. This is centered around investment in eight public comprehensive cancer  
6 centers covering all geo-political zones, as well as the implementation of various  
7 screening strategies throughout different sectors of the healthsystem.<sup>20</sup> Our results  
8 suggest that considerable work is required to reach the goal of “greater than 50%  
9 screening of ‘eligible populations’ by 2022.”<sup>20</sup> We assessed cancer screening using  
10 measures that are recommended in this national plan. The methods we assessed are  
11 accessed at different levels of the healthcare system – cervical cancer assessment  
12 predominantly at a primary health care level, breast cancer at secondary/tertiary level  
13 through mammography, and colon cancer at tertiary level through colonoscopy. Our  
14 analysis provides some idea of how individuals have navigated health system and  
15 their degree of engagement different levels.  
16  
17  
18  
19  
20  
21  
22  
23  
24  
25  
26  
27  
28  
29  
30  
31  
32  
33  
34

35 It is important to acknowledge that cancer screening in low and middle income  
36 countries requires measures tailored to local capacity and disease prevalence. For  
37 breast cancer, although mammography remains the gold standard for early detection  
38 of breast cancer, the Breast Health Global Initiative (BHGI) resource-stratified  
39 guidelines recommend clinical breast examination as a practical and necessary  
40 alternative for early detection in low-resource settings.<sup>19 45 48</sup> This has been  
41 recommended in local policy and was not assessed in the current study.<sup>20</sup> Despite  
42 this, with over 50 percent of individuals in this study visiting a primary health care  
43 doctor in the last year, our findings strongly support the need to concentrate cancer  
44 screening efforts at primary healthcare where possible through the use of similar  
45 interventions. Colon cancer screening by colonoscopy for those over the age of fifty  
46  
47  
48  
49  
50  
51  
52  
53  
54  
55  
56  
57  
58  
59  
60



1  
2  
3 as recommended in high income countries does not exist in sufficient capacity for this  
4  
5 to be recommended in an LMIC setting.<sup>49</sup> Efforts to intervene at primary healthcare  
6  
7 level through the use of stool testing and symptom stratification are ongoing.<sup>50 51</sup>  
8  
9  
10 Overall, education, training and adequately resourcing community healthcare workers  
11  
12 and physicians at primary healthcare level for cancer screening assessment is  
13  
14 essential.  
15

16  
17  
18  
19 We demonstrated that both income and medical expenditure relative to this level of  
20  
21 income, compounded by the lack of universal health care coverage, must be factored  
22  
23 into strategies laid out to address cancer control. The costs of the screening  
24  
25 interventions assessed in this study relative to income, are prohibitive for the majority  
26  
27 of individuals without government subsidy; approx. \$50 US ~ \$18000 Naira (for  
28  
29 mammography), \$15 US ~ \$3000 Naira (cervical smear). This is compounded by the  
30  
31 finding of only 4% of our cohort having health insurance coverage. In addition, major  
32  
33 medical costs were incurred by over half of those interviewed, and a significant  
34  
35 proportion of these costs were for chronic diseases (33%). Those individuals with the  
36  
37 lowest income were more likely to report visits to the doctor, chronic disease, and  
38  
39 significant “out of pocket” medical expenditures. The Nigerian national health  
40  
41 insurance scheme (NHIS) has been in place since 2005. When it was introduced, state  
42  
43 governments were instructed to adopt the program for their employees in the formal  
44  
45 sector. After insuring government employees, state governments were instructed to  
46  
47 expand coverage across all individuals with the goal of universal health coverage.<sup>14 15</sup>  
48  
49 Recent reports confirm that this expansion has been limited in Nigeria. In line with  
50  
51 previous studies, our data indicate that the NHIS is severely underutilized in the  
52  
53 community population.<sup>15 16</sup> The state health insurance scheme has been instituted in  
54  
55  
56  
57  
58  
59  
60

1  
2  
3 only 2 out of 36 states of the federation at community level and this has not been the  
4  
5 case in Osun state where the study took place.<sup>15</sup>  
6  
7  
8  
9

10 We found wide range of “major” medical expenditure in our study group, with a median  
11  
12 expenditure exceeding the monthly salary of ~45% of the group. It is important to note  
13  
14 that we did not obtain information on total household expenditures to allow a relative  
15  
16 assessment of the amount spent on medical costs, and, in turn, determine  
17  
18 “catastrophic” costs.<sup>16</sup> However, based on income and demographic comparisons with  
19  
20 other groups studied in the region, it is likely that catastrophic spending is high.<sup>52</sup>  
21  
22 Further research into how the money to cover medical expenditure is generated (i.e.,  
23  
24 personal savings, family savings, loans, etc.) is required. Taken together with prior  
25  
26 work in the region<sup>53 54</sup>, it is evident that risk pooling and financial risk protection are  
27  
28 required for the provision of preventative and therapeutic NCD health services.  
29  
30  
31  
32  
33  
34

35 Whilst we did not directly assess awareness of cancer screening, we did demonstrate  
36  
37 an association between cancer screening activity and education level. Levels of  
38  
39 education have been associated with awareness and accessing cancer services in  
40  
41 previous studies.<sup>35 42 44 55</sup> In addition to this, we also found that ~75% of participants  
42  
43 had access to radio and/or television within family and social networks, suggesting  
44  
45 that mass communication channels to promote health awareness exist. In fact, these  
46  
47 facilitated the current study when combined with strategies using mobile phone  
48  
49 technologies. More broadly, these channels represent promising avenues to promote  
50  
51 health and prevention of disease in the region.<sup>56</sup> In addition, “demand-side”  
52  
53 approaches to resource allocation, such as the stipend we provided for travel in the  
54  
55  
56  
57  
58  
59  
60

1  
2  
3 study or e-vouchers,<sup>57 58</sup> are likely to be well received by the community and may  
4  
5 promote uptake of health-screening activities.  
6  
7

8  
9  
10 A strength of this study is that it was performed within the community and involved  
11  
12 trained research staff fluent in the local dialect and used a validated questionnaire.  
13  
14 The study was performed in conjunction with local community healthcare workers and  
15  
16 the tertiary referral hospital, which was intended to help residents develop an  
17  
18 awareness of how and where healthcare can be accessed in the area and to establish  
19  
20 a sustained relationship with this community. Limitations of this work include the  
21  
22 potential for misclassification and recall bias, as we relied on individuals to  
23  
24 retrospectively describe their own health and socioeconomic status as well as their  
25  
26 interactions with healthcare services. In addition, while the study sample was chosen  
27  
28 at random and consecutive individuals were enrolled, the survey was conducted at a  
29  
30 single time that was mid-week, during the day; this timing may have affected our  
31  
32 sample composition (e.g., resulted in more females than males). Nevertheless, overall  
33  
34 consistency with national demographic indicators (e.g., income, education, and living  
35  
36 conditions) indicates that our sample is likely reflective of rural community-dwelling  
37  
38 individuals in the wider region.<sup>31 32</sup>  
39  
40  
41  
42  
43  
44  
45  
46

47 In summary, our results highlight infrequent cancer screening activities in a Nigerian  
48  
49 community population and identifies areas that can be targeted to address this,  
50  
51 including the use of measures focused at primary healthcare level, financial risk  
52  
53 protection, awareness, and strategic resource allocation.  
54  
55  
56  
57  
58  
59  
60

1  
2  
3  
4  
5  
6  
7  
8  
9  
10  
11  
12  
13  
14  
15  
16  
17  
18  
19  
20  
21  
22  
23  
24  
25  
26  
27  
28  
29  
30  
31  
32  
33  
34  
35  
36  
37  
38  
39  
40  
41  
42  
43  
44  
45  
46  
47  
48  
49  
50  
51  
52  
53  
54  
55  
56  
57  
58  
59  
60

For peer review only

## REFERENCES

1. Niessen LW, Mohan D, Akuoku JK, et al. Tackling socioeconomic inequalities and non-communicable diseases in low-income and middle-income countries under the Sustainable Development agenda. *Lancet* 2018;391(10134):2036-46. doi: 10.1016/s0140-6736(18)30482-3 [published Online First: 2018/04/09]
2. Ezzati M, Pearson-Stuttard J, Bennett JE, et al. Acting on non-communicable diseases in low- and middle-income tropical countries. *Nature* 2018;559(7715):507-16. doi: 10.1038/s41586-018-0306-9 [published Online First: 2018/07/27]
3. NCD Countdown 2030: worldwide trends in non-communicable disease mortality and progress towards Sustainable Development Goal target 3.4. *Lancet* 2018;392(10152):1072-88. doi: 10.1016/s0140-6736(18)31992-5 [published Online First: 2018/09/29]
4. GLOBOCAN 2018: counting the toll of cancer. *Lancet* 2018;392(10152):985. doi: 10.1016/s0140-6736(18)32252-9 [published Online First: 2018/09/29]
5. Bray F, Ferlay J, Soerjomataram I, et al. Global cancer statistics 2018: GLOBOCAN estimates of incidence and mortality worldwide for 36 cancers in 185 countries. *CA: A Cancer Journal for Clinicians* 2018;68(6):394-424. doi: 10.3322/caac.21492
6. Olaleye O, Ekrikpo U. Epidemiology of Cancers in Sub-Saharan Africa. In: Adedeji OA, ed. *Cancer in Sub-Saharan Africa: Current Practice and Future*. Cham: Springer International Publishing 2017:3-19.
7. Mostert S, Njuguna F, Olbara G, et al. Corruption in health-care systems and its effect on cancer care in Africa. *Lancet Oncol* 2015;16(8):e394-404. doi: 10.1016/s1470-2045(15)00163-1 [published Online First: 2015/08/08]
8. Harford JB. Barriers to overcome for effective cancer control in Africa. *Lancet Oncol* 2015;16(8):e385-93. doi: 10.1016/s1470-2045(15)00160-6 [published Online First: 2015/08/08]
9. Transforming our world : the 2030 Agenda for Sustainable Development: UN General Assembly; 21 October 2015 [Available from: <https://www.undp.org/content/undp/en/home/sustainable-development-goals.html> accessed 23 August 2019.
10. Douthit NT, Alemu HK. Social determinants of health: poverty, national infrastructure and investment. *BMJ Case Reports* 2016;2016:bcr2016215670. doi: 10.1136/bcr-2016-215670
11. Attia-Konan AR, Oga ASS, Touré A, et al. Distribution of out of pocket health expenditures in a sub-Saharan Africa country: evidence from the national survey of household standard of living, Côte d'Ivoire. *BMC Res Notes* 2019;12(1):25. doi: 10.1186/s13104-019-4048-z [published Online First: 2019/01/17]
12. Leive A, Xu K. Coping with out-of-pocket health payments: empirical evidence from 15 African countries. *Bull World Health Organ* 2008;86(11):849-56. doi: 10.2471/blt.07.049403 [published Online First: 2008/11/26]
13. Xu K, Evans DB, Kawabata K, et al. Household catastrophic health expenditure: a multicountry analysis. *Lancet* 2003;362(9378):111-7. doi: 10.1016/s0140-6736(03)13861-5 [published Online First: 2003/07/18]

14. Onoka CA, Onwujekwe OE, Uzochukwu BS, et al. Promoting universal financial protection: constraints and enabling factors in scaling-up coverage with social health insurance in Nigeria. *Health Res Policy Syst* 2013;11:20. doi: 10.1186/1478-4505-11-20 [published Online First: 2013/06/15]
15. Uzochukwu BS, Ughasoro MD, Etiaba E, et al. Health care financing in Nigeria: Implications for achieving universal health coverage. *Niger J Clin Pract* 2015;18(4):437-44. doi: 10.4103/1119-3077.154196 [published Online First: 2015/05/15]
16. Aregbeshola BS, Khan SM. Out-of-Pocket Payments, Catastrophic Health Expenditure and Poverty Among Households in Nigeria 2010. *Int J Health Policy Manag* 2018;7(9):798-806. doi: 10.15171/ijhpm.2018.19 [published Online First: 2018/10/15]
17. Jedy-Agba E, Curado MP, Ogunbiyi O, et al. Cancer incidence in Nigeria: a report from population-based cancer registries. *Cancer Epidemiol* 2012;36(5):e271-8. doi: 10.1016/j.canep.2012.04.007 [published Online First: 2012/05/25]
18. Awodele O, Adeyomoye AA, Awodele DF, et al. Cancer distribution pattern in south-western Nigeria. *Tanzan J Health Res* 2011;13(2):125-31. doi: 10.4314/thrb.v13i2.55226 [published Online First: 2011/04/01]
19. Ishola F, Omole O. A vision for improved cancer screening in Nigeria. *Lancet Glob Health* 2016;4(6):e359-60. doi: 10.1016/s2214-109x(16)30062-6 [published Online First: 2016/05/21]
20. Nigeria National Cancer Control Plan 2018 – 2022. Abuja: Federal Ministry of Health, Nigeria 2018.
21. World Bank staff estimates based on the United Nations Population Division's World Urbanization Prospects: 2018 Revision: The World Bank Group; [Available from: <https://data.worldbank.org/indicator/SP.RUR.TOTL.ZS> accessed November 2019.
22. Kingham TP, Alatise OI. Establishing Translational and Clinical Cancer Research Collaborations Between High- and Low-Income Countries. *Annals of Surgical Oncology* 2015;22(3):741-46. doi: 10.1245/s10434-014-4342-x
23. Irabor DO. Emergence of Colorectal Cancer in West Africa: Accepting the Inevitable. *Niger Med J* 2017;58(3):87-91. doi: 10.4103/0300-1652.234076 [published Online First: 2017/05/01]
24. National Population Commission (NPC) [Nigeria] and ICF International. 2014. Nigeria Demographic and Health Survey 2013. Abuja, Nigeria, and Rockville, Maryland, USA: NPC and ICF International. <https://dhsprogram.com/pubs/pdf/fr293/fr293.pdf> (Accessed February 14, 2018).
25. National Bureau of Statistics (NBS) - Federal Government of Nigeria. Nigeria - General Household Survey, Panel 2015-2016, Wave 3. <http://microdata.worldbank.org/index.php/catalog/2734/study-description> (Accessed February 15, 2018).
26. Cleland CL, Hunter RF, Kee F, et al. Validity of the global physical activity questionnaire (GPAQ) in assessing levels and change in moderate-vigorous physical activity and sedentary behaviour. *BMC Public Health* 2014;14:1255. doi: 10.1186/1471-2458-14-1255 [published Online First: 2014/12/11]
27. Colditz GA, Manson JE, Hankinson SE. The Nurses' Health Study: 20-year contribution to the understanding of health among women. *J Womens Health* 1997;6(1):49-62.
28. Hu FB, Satija A, Rimm EB, et al. Diet Assessment Methods in the Nurses' Health Studies and Contribution to Evidence-Based Nutritional Policies and Guidelines. *American*

- 1  
2  
3 *journal of public health* 2016;106(9):1567-72. doi: 10.2105/AJPH.2016.303348  
4 [published Online First: 2016/07/28]  
5  
6 29. Willett WC, Sampson L, Stampfer MJ, et al. REPRODUCIBILITY AND VALIDITY OF A  
7 SEMIQUANTITATIVE FOOD FREQUENCY QUESTIONNAIRE. *American Journal of*  
8 *Epidemiology* 1985;122(1):51-65. doi: 10.1093/oxfordjournals.aje.a114086  
9  
10 30. Wolf AM, Hunter DJ, Colditz GA, et al. Reproducibility and Validity of a Self-Administered  
11 Physical Activity Questionnaire. *International Journal of Epidemiology* 1994;23(5):991-  
12 99. doi: 10.1093/ije/23.5.991  
13  
14 31. Nigeria Demographic and Health Survey. Abuja, Nigeria: National Population Commission,  
15 Federal Republic of Nigeria, June 2014.  
16  
17 32. "Nigeria Country Briefing", Multidimensional Poverty Index Data Bank: Oxford Poverty  
18 and Human Development Initiative, University of Oxford.; 2017 [Available from:  
19 [www.ophi.org.uk/multidimensional-poverty-index/mpi-country-briefings/](http://www.ophi.org.uk/multidimensional-poverty-index/mpi-country-briefings/). accessed  
20 August 2019 2019.  
21  
22 33. Morhason-Bello IO, Odedina F, Rebbeck TR, et al. Challenges and opportunities in cancer  
23 control in Africa: a perspective from the African Organisation for Research and  
24 Training in Cancer. *Lancet Oncol* 2013;14(4):e142-51. doi: 10.1016/s1470-  
25 2045(12)70482-5 [published Online First: 2013/04/09]  
26  
27 34. Olasehinde O, Alatise OI, Arowolo OA, et al. Barriers to mammography screening in  
28 Nigeria: A survey of two communities with different access to screening facilities. *Eur*  
29 *J Cancer Care (Engl)* 2019;28(2):e12986. doi: 10.1111/ecc.12986 [published Online  
30 First: 2019/01/08]  
31  
32 35. McKenzie F, Zietsman A, Galukande M, et al. Breast cancer awareness in the sub-Saharan  
33 African ABC-DO cohort: African Breast Cancer—Disparities in Outcomes study. *Cancer*  
34 *Causes & Control* 2018;29(8):721-30. doi: 10.1007/s10552-018-1047-7  
35  
36 36. Makau-Barasa LK, Greene SB, Othieno-Abinya NA, et al. Improving Access to Cancer  
37 Testing and Treatment in Kenya. *Journal of Global Oncology* 2018(4):1-8. doi:  
38 10.1200/jgo.2017.010124  
39  
40 37. Ugwumba FO, Ekwueme OE, Okoh AD. Testicular Cancer and Testicular Self-Examination;  
41 Knowledge, Attitudes and Practice in Final Year Medical Students in Nigeria. *Asian Pac*  
42 *J Cancer Prev* 2016;17(11):4999-5003. doi: 10.22034/apjcp.2016.17.11.4999  
43 [published Online First: 2016/12/30]  
44  
45 38. Mbamara SU, Ikpeze OC, Okonkwo JE, et al. Knowledge, attitude and practice of cervical  
46 cancer screening among women attending gynecology clinics in a tertiary level  
47 medical care center in southeastern Nigeria. *J Reprod Med* 2011;56(11-12):491-6.  
48 [published Online First: 2011/12/27]  
49  
50 39. Wright KO, Kuyinu YA, Faduyile FA. Community education on cervical cancer amongst  
51 market women in an urban area of Lagos, Nigeria. *Asian Pac J Cancer Prev*  
52 2010;11(1):137-40. [published Online First: 2010/07/03]  
53  
54 40. Aniebue PN, Aniebue UU. Awareness and practice of cervical cancer screening among  
55 female undergraduate students in a Nigerian university. *J Cancer Educ* 2010;25(1):106-  
56 8. doi: 10.1007/s13187-009-0023-z [published Online First: 2010/01/19]  
57  
58 41. Ajape AA, Babata A, Abiola OO. Knowledge of prostate cancer screening among native  
59 African urban population in Nigeria. *Nig Q J Hosp Med* 2010;20(2):94-6. [published  
60 Online First: 2011/01/20]

- 1
- 2
- 3
- 4 42. Obiechina NJ, Mbamara SU. Knowledge attitude and practice of cervical cancer screening
- 5 among sexually active women in Onitsha, southeast Nigeria. *Niger J Med*
- 6 2009;18(4):384-7. [published Online First: 2010/02/03]
- 7 43. Kontis V, Mathers CD, Bonita R, et al. Regional contributions of six preventable risk factors
- 8 to achieving the 25 x 25 non-communicable disease mortality reduction target: a
- 9 modelling study. *Lancet Glob Health* 2015;3(12):e746-57. doi: 10.1016/s2214-
- 10 109x(15)00179-5 [published Online First: 2015/10/27]
- 11 44. Tiruneh FN, Chuang KY, Ntenda PAM, et al. Individual-level and community-level
- 12 determinants of cervical cancer screening among Kenyan women: a multilevel analysis
- 13 of a Nationwide survey. *BMC Womens Health* 2017;17(1):109. doi: 10.1186/s12905-
- 14 017-0469-9 [published Online First: 2017/11/17]
- 15 45. Masalu N, Serra P, Amadori D, et al. Setting up a community-based cervical screening
- 16 service in a low-income country: a pilot study from north-western Tanzania.
- 17 *International Journal of Public Health* 2017;62(7):755-62. doi: 10.1007/s00038-017-
- 18 0971-8
- 19 46. Kangmennaang J, Mkandawire P, Luginaah I. Breast cancer screening among women in
- 20 Namibia: explaining the effect of health insurance coverage and access to information
- 21 on screening behaviours. *Glob Health Promot* 2017;1757975917727017. doi:
- 22 10.1177/1757975917727017 [published Online First: 2017/09/26]
- 23 47. Stulac S, Binagwaho A, Tapela NM, et al. Capacity building for oncology programmes in
- 24 sub-Saharan Africa: the Rwanda experience. *Lancet Oncol* 2015;16(8):e405-13. doi:
- 25 10.1016/s1470-2045(15)00161-8 [published Online First: 2015/08/08]
- 26 48. Anderson BO, Yip CH, Smith RA, et al. Guideline implementation for breast healthcare in
- 27 low-income and middle-income countries: overview of the Breast Health Global
- 28 Initiative Global Summit 2007. *Cancer* 2008;113(8 Suppl):2221-43. doi:
- 29 10.1002/cncr.23844 [published Online First: 2008/09/26]
- 30 49. Knapp GC, Alatise OI, Olasehinde OO, et al. Is Colorectal Cancer Screening Appropriate in
- 31 Nigeria? *J Glob Oncol* 2019;5:1-10. doi: 10.1200/jgo.19.00035 [published Online First:
- 32 2019/06/07]
- 33 50. Alatise OI, Ayandipo OO, Adeyeye A, et al. A symptom-based model to predict colorectal
- 34 cancer in low-resource countries: Results from a prospective study of patients at high
- 35 risk for colorectal cancer. *Cancer* 2018;124(13):2766-73. doi: 10.1002/cncr.31399
- 36 [published Online First: 2018/04/13]
- 37 51. Knapp GC, Sharma A, Olopade B, et al. An Exploratory Analysis of Fecal Immunochemical
- 38 Test Performance for Colorectal Cancer Screening in Nigeria. *World J Surg*
- 39 2019;43(11):2674-80. doi: 10.1007/s00268-019-05100-0 [published Online First:
- 40 2019/08/14]
- 41 52. Olugbenga-Bello A, Adebimpe W. Knowledge and attitude of civil servants in Osun state,
- 42 Southwestern Nigeria towards the national health insurance. *Nigerian Journal of*
- 43 *Clinical Practice* 2010;13(4):421-26.
- 44 53. Dieleman JL, Sadat N, Chang AY, et al. Trends in future health financing and coverage:
- 45 future health spending and universal health coverage in 188 countries, 2016–40. *The*
- 46 *Lancet* 2018;391(10132):1783-98. doi: [https://doi.org/10.1016/S0140-](https://doi.org/10.1016/S0140-6736(18)30697-4)
- 47 [6736\(18\)30697-4](https://doi.org/10.1016/S0140-6736(18)30697-4)
- 48 54. Dieleman J, Campbell M, Chapin A, et al. Evolution and patterns of global health financing
- 49 1995–2014: development assistance for health, and government, prepaid private, and
- 50
- 51
- 52
- 53
- 54
- 55
- 56
- 57
- 58
- 59
- 60



- 1  
2  
3 out-of-pocket health spending in 184 countries. *The Lancet* 2017;389(10083):1981-  
4 2004. doi: [https://doi.org/10.1016/S0140-6736\(17\)30874-7](https://doi.org/10.1016/S0140-6736(17)30874-7)  
5  
6 55. Alatise OI, Fischer SE, Ayandipo OO, et al. Health-Seeking Behavior and Barriers to Care in  
7 Patients With Rectal Bleeding in Nigeria. *Journal of global oncology* 2017;3(6):749-56.  
8 doi: 10.1200/JGO.2016.006601 [published Online First: 2017/02/01]  
9  
10 56. Yang Q, Van Stee SK. The Comparative Effectiveness of Mobile Phone Interventions in  
11 Improving Health Outcomes: Meta-Analytic Review. *JMIR Mhealth Uhealth*  
12 2019;7(4):e11244. doi: 10.2196/11244 [published Online First: 2019/04/04]  
13  
14 57. Erwin E, Aronson KJ, Day A, et al. SMS behaviour change communication and eVoucher  
15 interventions to increase uptake of cervical cancer screening in the Kilimanjaro and  
16 Arusha regions of Tanzania: a randomised, double-blind, controlled trial of  
17 effectiveness. *BMJ Innovations* 2019:bmjinnov-2018-000276. doi: 10.1136/bmjinnov-  
18 2018-000276  
19  
20 58. Hurst TE, Semrau K, Patna M, et al. Demand-side interventions for maternal care: evidence  
21 of more use, not better outcomes. *BMC Pregnancy Childbirth* 2015;15:297. doi:  
22 10.1186/s12884-015-0727-5 [published Online First: 2015/11/17]  
23  
24  
25  
26  
27  
28  
29  
30  
31  
32  
33  
34  
35  
36  
37  
38  
39  
40  
41  
42  
43  
44  
45  
46  
47  
48  
49  
50  
51  
52  
53  
54  
55  
56  
57  
58  
59  
60

# BMJ Open

## Healthcare utilization, cancer screening and potential barriers to accessing cancer care in Rural South-West Nigeria: A cross-sectional study.

|                                 |                                                                                                                                                                                                                                                                                                                                                                                                                                                                                                                                                                                                                                                                                                                                                                                                                                |
|---------------------------------|--------------------------------------------------------------------------------------------------------------------------------------------------------------------------------------------------------------------------------------------------------------------------------------------------------------------------------------------------------------------------------------------------------------------------------------------------------------------------------------------------------------------------------------------------------------------------------------------------------------------------------------------------------------------------------------------------------------------------------------------------------------------------------------------------------------------------------|
| Journal:                        | <i>BMJ Open</i>                                                                                                                                                                                                                                                                                                                                                                                                                                                                                                                                                                                                                                                                                                                                                                                                                |
| Manuscript ID                   | bmjopen-2020-040352.R1                                                                                                                                                                                                                                                                                                                                                                                                                                                                                                                                                                                                                                                                                                                                                                                                         |
| Article Type:                   | Original research                                                                                                                                                                                                                                                                                                                                                                                                                                                                                                                                                                                                                                                                                                                                                                                                              |
| Date Submitted by the Author:   | 02-May-2021                                                                                                                                                                                                                                                                                                                                                                                                                                                                                                                                                                                                                                                                                                                                                                                                                    |
| Complete List of Authors:       | Sharma, Avinash; Memorial Sloan Kettering Cancer Center, Surgery<br>Alatise, Olusegun; Obafemi Awolowo University Teaching Hospital Complex<br>O'Connell, Kelli; Memorial Sloan Kettering Cancer Center, Epidemiology and Biostatistics<br>Gbenga, Ogunleye; Obafemi Awolowo University Teaching Hospital Complex, Surgery<br>Aderounmu, Adewale; Obafemi Awolowo University Teaching Hospital Complex, Surgery<br>Samson, Marquerite; Memorial Sloan Kettering Cancer Center, Epidemiology and Biostatistics<br>Wuraola, Funmilola; Obafemi Awolowo University Teaching Hospital Complex<br>Olasehinde, Olalekan; Obafemi Awolowo University Teaching Hospital Complex<br>Kingham, T; Memorial Sloan Kettering Cancer Center, Surgery<br>Du, Mengmeng; Memorial Sloan Kettering Cancer Center, Epidemiology and Biostatistics |
| <b>Primary Subject Heading</b>: | Global health                                                                                                                                                                                                                                                                                                                                                                                                                                                                                                                                                                                                                                                                                                                                                                                                                  |
| Secondary Subject Heading:      | Oncology, Health services research, Public health                                                                                                                                                                                                                                                                                                                                                                                                                                                                                                                                                                                                                                                                                                                                                                              |
| Keywords:                       | PUBLIC HEALTH, PREVENTIVE MEDICINE, Epidemiology < ONCOLOGY, Health policy < HEALTH SERVICES ADMINISTRATION & MANAGEMENT, Organisation of health services < HEALTH SERVICES ADMINISTRATION & MANAGEMENT, Health economics < HEALTH SERVICES ADMINISTRATION & MANAGEMENT                                                                                                                                                                                                                                                                                                                                                                                                                                                                                                                                                        |
|                                 |                                                                                                                                                                                                                                                                                                                                                                                                                                                                                                                                                                                                                                                                                                                                                                                                                                |

SCHOLARONE™  
Manuscripts



I, the Submitting Author has the right to grant and does grant on behalf of all authors of the Work (as defined in the below author licence), an exclusive licence and/or a non-exclusive licence for contributions from authors who are: i) UK Crown employees; ii) where BMJ has agreed a CC-BY licence shall apply, and/or iii) in accordance with the terms applicable for US Federal Government officers or employees acting as part of their official duties; on a worldwide, perpetual, irrevocable, royalty-free basis to BMJ Publishing Group Ltd ("BMJ") its licensees and where the relevant Journal is co-owned by BMJ to the co-owners of the Journal, to publish the Work in this journal and any other BMJ products and to exploit all rights, as set out in our [licence](#).

The Submitting Author accepts and understands that any supply made under these terms is made by BMJ to the Submitting Author unless you are acting as an employee on behalf of your employer or a postgraduate student of an affiliated institution which is paying any applicable article publishing charge ("APC") for Open Access articles. Where the Submitting Author wishes to make the Work available on an Open Access basis (and intends to pay the relevant APC), the terms of reuse of such Open Access shall be governed by a Creative Commons licence – details of these licences and which [Creative Commons](#) licence will apply to this Work are set out in our licence referred to above.

Other than as permitted in any relevant BMJ Author's Self Archiving Policies, I confirm this Work has not been accepted for publication elsewhere, is not being considered for publication elsewhere and does not duplicate material already published. I confirm all authors consent to publication of this Work and authorise the granting of this licence.

1  
2  
3 Healthcare utilization, cancer screening and potential barriers to accessing cancer  
4 care in Rural South-West Nigeria: A cross-sectional study.  
5  
6  
7  
8  
9

10 Sharma A. MD<sup>1</sup>, Alatise O. I. MBChB<sup>2</sup>, O'Connell K. MSc<sup>3</sup>, Gbenga O.S. MSc<sup>2</sup>,  
11 Aderounmu A.A. MBChB<sup>2</sup>, Samson. M.L. BSc<sup>3</sup>, Wuraola F. MBChB<sup>2</sup>, Olasehinde O.  
12 MBChB, Kingham T.P MD<sup>1</sup>, Du M. ScD<sup>3</sup>  
13  
14  
15  
16  
17  
18

19 <sup>1</sup>Department of Surgery, Memorial Sloan Kettering Cancer Center, New York, NY;  
20 <sup>2</sup>Obafemi Awolowo University, Ile-Ife, Nigeria; <sup>3</sup>Department of Epidemiology and  
21 Biostatistics, Memorial Sloan Kettering Cancer Center, New York, NY. African  
22 Research Group for Oncology (ARGO).  
23  
24  
25  
26  
27  
28  
29

30 **Acknowledgments:** The authors would like to acknowledge the dedicated research  
31 team at OAUTHC for their efforts in this project, the local community leaders and  
32 healthcare workers, as well as the support from Prof. Adesgun Fatusi and his research  
33 staff.  
34  
35  
36  
37  
38  
39  
40  
41

42 **Funding:** This research was conducted with the support of the African Research  
43 Group for Oncology (ARGO) consortium. The consortium was initiated using a pilot  
44 grant funding from the National Cancer Institute's Center for Global Health to perform  
45 dedicated cancer research in the region. This research was funded in part through the  
46 NIH/NCI Cancer Center Support Grant P30 CA008748.  
47  
48  
49  
50  
51  
52  
53  
54  
55

56 **Correspondence:**

57  
58 Avinash Sharma  
59  
60

1  
2  
3 Memorial Sloan Kettering Cancer Center

4  
5 1275 York Avenue, C-886

6  
7 New York, NY 10065

8  
9  
10 [avinash.s.sharma@gmail.com](mailto:avinash.s.sharma@gmail.com)

11  
12  
13  
14  
15 **Conflicts of Interest:** None to declare

16  
17  
18  
19  
20  
21  
22  
23  
24  
25  
26  
27  
28  
29  
30  
31  
32  
33  
34  
35  
36  
37  
38  
39  
40  
41  
42  
43  
44  
45  
46  
47  
48  
49  
50  
51  
52  
53  
54  
55  
56  
57  
58  
59  
60

For peer review only

**Author contributions:**1. **Avinash Sharma**

Author contributions: Initial conception, study and questionnaire design, data collection, data analysis, manuscript writing

2. **O.I. Alatise**

Author contribution: Initial conception, study and questionnaire design, manuscript revision

3. **K. O'Connell**

Author contributions: Data and statistical analysis, questionnaire design, manuscript revision

4. **O.S. Gbenga**

Author contributions: study organisation, data collection

5. **A.A. Aderounmu**

Author contributions: study organisation, data collection

6. **M.L.Samson**

Author contributions: study and questionnaire design

7. **F. Wuraola**

Author contributions: Manuscript revision

8. **O. Olasehinde**

Author contributions: study design, data collection, manuscript revision

9. **T.P. Kingham**

Author contributions: Initial conception, study design, overall supervision, manuscript revision

10. **M. Du**

Author contributions: Initial conception, study and questionnaire design, overall supervision, manuscript revision

1  
2  
3  
4  
5  
6  
7  
8  
9  
10  
11  
12  
13  
14  
15  
16  
17  
18  
19  
20  
21  
22  
23  
24  
25  
26  
27  
28  
29  
30  
31  
32  
33  
34  
35  
36  
37  
38  
39  
40  
41  
42  
43  
44  
45  
46  
47  
48  
49  
50  
51  
52  
53  
54  
55  
56  
57  
58  
59  
60

For peer review only

## ABSTRACT

**Background/Aims:** Cancer burden is predicted to double by 2030 in sub-Saharan Africa. Accordingly, access to healthcare services for cancer management has been made a priority in the region. In Nigeria, the National Cancer Control Plan aims to ensure greater than 50% cancer screening of eligible populations by 2022 for all Nigerians. This study sought to describe current healthcare utilization, cancer screening activities and potential barriers to accessing cancer care within a rural community-based adult population in South-West Nigeria.

**Methods:** During April 2018, a cross-sectional study of community-based adults (>18 years) was conducted approximately 130 kilometers east of Ibadan, 250 km from Lagos in Osun State, South-West Nigeria. Participants completed a face-to-face survey in local dialect. A questionnaire was used to assess demographics, health status, income, medical expenditures, doctor visits, and cancer screening history.

**Results:** A total of 346 individuals were enrolled; the median age was 52 years, and 75% of participants were female. Of the entire cohort, only 4% had medical insurance, 46% reported a major medical cost in the last year. Cancer screening activities were infrequent, with 1.5% of participants reporting having cervical cancer screening and 3.3% of participants >40 years having a mammogram. Colonoscopy screening in those >50 years was 5%. Cancer screening assessment was less frequent in those with less income and lower levels of education. Despite this, we observed that most individuals had contact with a primary health care doctor (52% in the last year), and over 70% access to radio and TV suggesting the opportunity to expand community-based screening interventions and awareness exist.

**Conclusions:** Despite expected increases in cancer cases, our data highlight a deficiency in cancer screening and lack of universal healthcare coverage within a



1  
2  
3 community-based adult Nigerian population. Increasing financial risk protection,  
4 awareness, and targeted resource allocation may help expand access.  
5  
6  
7  
8  
9

10 Keywords: Non-communicable disease, Sub-Saharan Africa, Cancer, Universal  
11 Healthcare, Screening  
12  
13  
14  
15  
16

### 17 **Strengths and Limitations of the study:**

- 18  
19  
20  
21  
22 1) The study provided a contemporary perspective potential barriers to accessing  
23 medical and cancer care in rural South-West Nigeria. Recruitment and data  
24 collection performed by interviewers fluent in the local dialect who underwent a  
25 systematic and rigorous two-day training program.  
26  
27  
28  
29  
30  
31  
32  
33 2) Questionnaire tailored to the local population and developed in collaboration  
34 with local clinicians, epidemiologists, and nutritionists. Questionnaire items  
35 derived by adapting features from validated and/or widely implemented local or  
36 nationwide surveys.  
37  
38  
39  
40  
41  
42  
43  
44  
45  
46 3) Study conducted in conjunction with local community healthcare workers and  
47 the regional tertiary referral hospital to help build capacity, increase healthcare  
48 awareness, and establish a sustained relationship with these rural  
49 communities.  
50  
51  
52  
53  
54  
55  
56  
57  
58  
59  
60

1  
2  
3 4) Potential for measurement error or recall bias, as we relied on individuals to  
4  
5 retrospectively describe their own health and socioeconomic status as well as  
6  
7 their interactions with healthcare services.  
8  
9

10  
11  
12  
13 5) Survey conducted at a single time (mid-week, during the day) in two geographic  
14  
15 locations, which may have affected sample composition (e.g., more females  
16  
17 than males).  
18  
19

## INTRODUCTION

The burden of non-communicable disease (NCD), in particular cancer, in sub-Saharan Africa is well documented.<sup>1-3</sup> According to recent International Agency for Research on Cancer GLOBOCAN estimates, by 2030, 75% of new cancer cases will be within low and middle-income countries.<sup>4,5</sup> In sub-Saharan Africa, despite the fact that cancer burden is predicted to double by 2030, the entire region accounts for <1% of worldwide medical cancer expenditures.<sup>6-8</sup> Central to addressing the growing burden of cancer in sub-Saharan Africa is the need to improve access to cancer care services for screening, prevention, and treatment.<sup>9</sup>

NCDs, including cancer, threaten to overwhelm fragile health systems in sub-Saharan Africa and lead to dramatic rises in health and social care costs in the near-term.<sup>7, 10</sup> In the region, out-of-pocket health expenditures are a major contributor to poverty<sup>11-13</sup>, and a lack of adequate social protection has the potential to drive families and individuals further into poverty. In Nigeria, universal healthcare coverage in the form of the National Health Insurance Scheme (NHIS) was implemented in 2005, with an overarching goal of universal health coverage for all Nigerians.<sup>14</sup> However, uptake has been limited and restricted,<sup>15</sup> and as a result, the large majority of Nigerians still face significant financial burden when healthcare needs arise.<sup>15, 16</sup>

In Nigeria cancer incidence and mortality is increasing and women have a higher cancer incidence than men.<sup>17</sup> The most common forms of cancer in Nigeria are breast and cervical, with these accounting for over 50 percent of cancer deaths.<sup>17-19</sup> Regionally, the need to improve access to cancer services for early detection has been recognised, with a focus on these cancers. In 2018, Nigeria launched the “National

1  
2  
3 Cancer Control Plan 2018-2022,” with the goal to make screening services available  
4 for all Nigerians, and at least “greater than 50% screening of all eligible populations  
5 by 2022.”<sup>20</sup> Despite this, the current state of cancer screening activities and barriers  
6 to care in this region (esp. rural areas) are not well-defined or documented. This gap  
7 limits our ability to define actionable steps towards improving access and achieving  
8 the established screening goal. National programmes for screening breast and  
9 cervical cancer are lacking. Typically, screening interactions occur at primary health  
10 care facilities or community health clinics – often for women when they are being seen  
11 during pregnancy or for other related health issues such as immunisations. Screening  
12 services for cervical and breast cancer have been implemented sporadically by both  
13 government and non-government organisations but predominantly in urban areas.  
14 The overwhelming majority of individuals in the region are symptomatic when they  
15 present with disease. With 50 percent of Nigeria’s population living in rural areas<sup>21</sup> we  
16 hypothesize that unique challenges may exist for individuals in these communities,  
17 where nationwide initiatives may have limited reach.  
18  
19  
20  
21  
22  
23  
24  
25  
26  
27  
28  
29  
30  
31  
32  
33  
34  
35  
36  
37  
38  
39

40 This study aimed to describe potential barriers to accessing cancer care within a rural  
41 community-based adult population in South-West Nigeria. This study was performed  
42 as part of a broader community-based capacity building project in South-West  
43 Nigeria<sup>22</sup> investigating potentially modifiable cancer risk factors in the setting of rising  
44 rates of cancer in the region.<sup>6 19 20 23</sup> Herein, we report health insurance coverage and  
45 socioeconomic status in relation to health conditions, health expenditures, cancer  
46 screening assessment and provide a snapshot of the health needs and burden faced  
47 by individuals in the region.  
48  
49  
50  
51  
52  
53  
54  
55  
56  
57  
58  
59  
60

## METHODS

### *Study Design/Setting*

During April 2018, a cross-sectional study of community-based adults was conducted in Osun State, South-West Nigeria. Two rural towns Ijebu-Jesa and Ere-Jesa, (approximately 130 kilometers east of Ibadan, 250 km from Lagos, on latitude 7.45 degrees north within the rain forest belt), were selected at random. These towns were in proximity to Obafemi Awolowo University Teaching Hospital Complex, Ile-Ife, the main tertiary referral center in the region. This study was part of a broader capacity building project in the region to improve cancer care. It was a baseline study to assess access to cancer services but also explore unique risk factors for cancer – such as diet, exercise, microbial and environmental exposures. The study was approved by the Obafemi Awolowo University institutional ethics review committee.

### *Patient and Public Involvement*

Prior to the study, local community leaders in the towns were contacted, and the goals of the research were explained. In the time leading up to the study, healthcare workers and community leaders notified and mobilized all potential participants in the two communities. They were also involved in the design of the study and in disseminating the results to all participants. Participants were notified of the study through discussion at the weekly local community meetings in the month leading up to the study, advertisements on local radio-stations and through community workers visiting regional sites.

### *Participants*

Adults >18 years in the two towns were invited to participate. Adult participants were consecutively enrolled upon arrival at pre-designated locations (main town hall) in the two towns. Based on the resource capacity of each town hall and the size of each community, enrolment was to be capped at a maximum of 300 participants at Ijebu-Jesa and 100 at Ere-Jesa. All study participants received blood pressure checks, and health promotion talks were held for those waiting to be surveyed. Study participants were given a small stipend to cover their transportation costs to the study venue on the study day (300 Naira, ~80 US cents). This amount was determined by local healthcare workers.

### *Questionnaire*

The survey consisted of a questionnaire to gather quantitative data on demographics, health status, income, medical expenditures, dietary habits, physical activity, family history, screening history, medical history, reproductive history, primary healthcare visits, medication use, and environmental exposures. The questionnaire used was developed in collaboration with local clinicians, epidemiologists, and nutritionists, and was derived by adapting features from validated and/or widely implemented local or nationwide surveys. This included the Nigeria Demographic and Health Survey,<sup>24</sup> Nigeria General Household Survey,<sup>25</sup> World Health Organization-endorsed Global Physical Activity Questionnaire,<sup>26</sup> and the Nurses' Health Study questionnaire.<sup>27-30</sup>

### *Data collection*

After obtaining informed consent, the study participants underwent a 50-60 minute one-on-one, face-to-face survey conducted in the local Yoruba dialect by a trained

1  
2  
3 research assistant. All research assistants underwent a two-day training program that  
4 involved education into the research aims, methodology, and ethics as well as  
5 interview techniques through role playing exercises, pilot testing of the questionnaire  
6 and the use of electronic tablets for recording data.  
7  
8  
9  
10  
11  
12  
13

### 14 *Outcome measures*

15  
16 Cancer screening activities in screen-eligible individuals included history of cervical  
17 examination and screening test in women >21 years, mammogram in women >40  
18 years, and colonoscopy in all individuals >50 years. Because cervical cancer  
19 screening intervention was self-reported, screening could be by pap smear or visual  
20 inspection with acetic acid or Lugo's iodine (VIA/VILI). This could be conducted in a  
21 primary healthcare setting. Manual breast examination by a health care worker was  
22 not captured and therefore the assessed intervention evaluated management at local  
23 secondary and tertiary health care facilities. All of the assessed interventions were  
24 screening activities specified as part of the Nigerian National Cancer Control Plan  
25 2018-2022. Medical expenses were defined as any 'major medical costs' as perceived  
26 by the study participant on direct questioning. This was clarified by recording the  
27 amount spent in Naira, and the medical reason for the expenditure was also  
28 documented. Demographic and socioeconomic data collected from our study  
29 population were compared to data from the Nigerian Demographic and Health Survey  
30 and the Oxford Poverty Health Indicator <sup>31 32</sup> to assess external validity.  
31  
32  
33  
34  
35  
36  
37  
38  
39  
40  
41  
42  
43  
44  
45  
46  
47  
48  
49  
50  
51  
52  
53

### 54 *Statistical analysis*

55  
56 Data were summarized in the form of proportions and frequency tables for categorical  
57 variables. Continuous variables were summarized using mean, median, and standard  
58  
59  
60

deviation. Comparisons of discrete variables were computed using Fisher's exact test and multiple logistic regression. Missing data were not possible for completed questionnaires as only complete responses to questions could be processed in order to advance the survey on the electronic tablets. All analyses were conducted using SAS software version 9.4 (SAS Institute Inc., Cary, NC)

## RESULTS

A total of 346 individuals were consecutively enrolled in the study and interviewed. Enrolment was capped at this number to ensure complete surveys could be conducted for all individuals. All individuals that were interviewed provided data for analysis. The demographic features of the group are presented in **Table 1**. The majority of participants were Yoruba speaking (n=332, 96%) and married (n=213, 62%) with a median age of 52 years. Females accounted for 75% of the cohort (n=261). Most individuals had some form of education, with 166 participants (48%) reporting more than primary school education. In addition, 30 participants (9%) reported being unemployed. Of female participants, 70% had  $\geq 4$  live births.

**Table 1: Demographic characteristics of the study group (n=346)**

(n=268 Ijebu-Jesa, n=68 Ere-Jesa)

| Variable                    | n (%)       |
|-----------------------------|-------------|
| Median Age, years (range)   | 52 (18-100) |
| <b>Sex</b>                  |             |
| Male                        | 85 (24.6)   |
| Female                      | 261 (75.4)  |
| <b>Marital Status</b>       |             |
| Single                      | 27 (7.8)    |
| Married                     | 213 (61.6)  |
| Other (Divorced/cohabiting) | 106 (30.6)  |
| <b>Tribe</b>                |             |



|                                               |                      |            |
|-----------------------------------------------|----------------------|------------|
|                                               | Yoruba               | 332 (96.0) |
|                                               | Ibo                  | 5 (1.4)    |
|                                               | Other                | 9 (2.6)    |
| <b>Religion</b>                               |                      |            |
|                                               | Christian            | 326 (94.2) |
|                                               | Muslim               | 19 (5.5)   |
|                                               | Other                | 1 (0.3)    |
| <b>Education</b>                              |                      |            |
|                                               | No formal education  | 88 (25.4)  |
|                                               | Primary              | 92 (26.6)  |
|                                               | Secondary            | 92 (26.6)  |
|                                               | Vocational/Technical | 45 (13.0)  |
|                                               | Higher               | 29 (8.4)   |
| <b>Occupation</b>                             |                      |            |
|                                               | Unemployed           | 30 (8.7)   |
|                                               | Civil servant        | 30 (8.7)   |
|                                               | Trader               | 123 (35.5) |
|                                               | Farmer               | 35 (10.1)  |
|                                               | Self-employed        | 80 (23.1)  |
|                                               | Other                | 48 (13.9)  |
| <b>Number of Live Births (Females, n=242)</b> |                      |            |
|                                               | 0                    | 6 (2.5)    |
|                                               | 1                    | 15 (6.2)   |
|                                               | 2                    | 23 (9.5)   |
|                                               | 3                    | 28 (11.6)  |
|                                               | 4                    | 54 (22.3)  |
|                                               | 5 or more            | 116 (47.9) |

Overall, 155 participants (45%) had a personal monthly income of <10,000 Naira (~1 USD per day), and 134 individuals (76%) had a family monthly income of <50,000 Naira (140 USD per month) (**Table 2a**). In addition, 198 participants (57%) lived in a family home or owned an apartment. The majority of participants (92%) reported having access to electricity, and over 70% reported access to television (76%) or radio (73%).

To assess the comparability of our results to the general Nigerian population, we compared the data from our study population to that recorded in the Nigerian

Demographic and Health Survey (**Table 2b**).<sup>31</sup> Both groups had similar degrees of education at the primary level for males and females, but overall there were fewer uneducated males and females within our surveyed population when compared to national averages. Our surveyed group also had better access to electricity, radio, and television compared to the national survey group (rural). When compared to equivalent parameters for Nigeria from the multi-dimensional poverty index (MPI) developed by the Oxford Poverty and Human Development Initiative,<sup>32</sup> our study population had similar levels of deprivation for years of schooling (defined as <6 years of school) and electricity (defined as no household electricity).

**Table 2a: Income and household conditions**

| Variable                                     | n (%)      |
|----------------------------------------------|------------|
| <b>Personal income (per month, in Naira)</b> |            |
| <10,000                                      | 155 (44.8) |
| 10,000-49,999                                | 139 (40.2) |
| 50,000-99,999                                | 26 (7.5)   |
| 100,000-249,999                              | 16 (4.6)   |
| 250,000-499,999                              | 9 (2.6)    |
| ≥500,000                                     | 1 (0.3)    |
| <b>Family income (per month, in Naira)</b>   |            |
| <10,000                                      | 117 (33.8) |
| 10,000-49,999                                | 147 (42.5) |
| 50,000-99,999                                | 38 (11.0)  |
| 100,000-249,999                              | 28 (8.1)   |
| 250,000-499,999                              | 11 (3.2)   |
| ≥500,000                                     | 5 (1.4)    |
| <b>Type of dwelling</b>                      |            |
| Own apartment                                | 131 (37.9) |
| Rent apartment                               | 146 (42.2) |
| Family house                                 | 67 (19.4)  |
| Other                                        | 2 (0.6)    |
| <b>Type of toilet</b>                        |            |
| Water system                                 | 151 (43.6) |
| Pit latrine                                  | 164 (47.4) |
| Bush                                         | 23 (6.6)   |
| Bucket                                       | 7 (2.0)    |
| Other                                        | 1 (0.3)    |

|                     |                      |            |
|---------------------|----------------------|------------|
| <b>Water source</b> |                      |            |
|                     | Pipe borne/boreholes | 185 (53.5) |
|                     | Well                 | 146 (42.2) |
|                     | River                | 15 (4.3)   |
| <b>Appliances</b>   |                      |            |
|                     | Electricity          | 318 (91.9) |
|                     | Television           | 262 (75.7) |
|                     | Radio                | 251 (72.5) |
|                     | Refrigerator         | 154 (44.5) |
|                     | Air conditioner      | 8 (2.3)    |
|                     | Generating set       | 99 (28.6)  |
|                     | Personal computer    | 38 (11.0)  |
|                     | None                 | 18 (5.2)   |

**Table 2b: Comparison between study sample characteristics and 2013 Nigerian National Demographic and Health Survey (NDHS)**

|                                               | NDHS<br>Urban<br>(%)           | NDHS<br>Rural<br>(%)         | NDHS<br>Total<br>(%)                        | Current study<br>(%)                  |
|-----------------------------------------------|--------------------------------|------------------------------|---------------------------------------------|---------------------------------------|
| <b>Cooking Fuel</b>                           |                                |                              |                                             |                                       |
| Electricity                                   | 0.7                            | 0.2                          | 0.4                                         | 10.7                                  |
| Liquefied petroleum gas/natural<br>Gas/biogas | 4.6                            | 0.5                          | 2.3                                         | 21.1                                  |
| Kerosene                                      | 47.6                           | 8.7                          | 25.5                                        | 31.8                                  |
| Charcoal                                      | 5.3                            | 1.6                          | 3.2                                         | 2.3                                   |
| Wood                                          | 37.9                           | 83.3                         | 63.7                                        | 34.1                                  |
| <b>Electricity</b>                            |                                |                              |                                             |                                       |
| Yes                                           | 83.6                           | 34.4                         | 55.6                                        | 91.9                                  |
| No                                            | 16.3                           | 65.4                         | 44.2                                        | 8.1                                   |
| Missing                                       | 0.1                            | 0.2                          | 0.2                                         | 0                                     |
| <b>Household Appliances</b>                   |                                |                              |                                             |                                       |
| Radio                                         | 77.7                           | 61.3                         | 68.3                                        | 72.5                                  |
| Television                                    | 73.2                           | 28.2                         | 47.6                                        | 75.7                                  |
| Refrigerator                                  | 32.5                           | 7.5                          | 18.3                                        | 44.5                                  |
| <b>Means of Transportation</b>                |                                |                              |                                             |                                       |
| Bicycle                                       | 12.7                           | 18.3                         | 18.3                                        | 0.9                                   |
| Motorcycle/scooter                            | 27.0                           | 31.2                         | 31.2                                        | 15.0                                  |
| Car/truck                                     | 14.4                           | 8.7                          | 8.7                                         | 12.1                                  |
| <b>Education</b>                              | <b>NDHS<br/>Female<br/>(%)</b> | <b>NDHS<br/>Male<br/>(%)</b> | <b>Current<br/>study<br/>Female<br/>(%)</b> | <b>Current study<br/>Male<br/>(%)</b> |
| No formal education                           | 37.8                           | 21.2                         | 28.7                                        | 15.3                                  |
| Primary                                       | 17.3                           | 16.7                         | 26.8                                        | 25.9                                  |
| Secondary                                     | 35.8                           | 47.7                         | 28.0                                        | 22.4                                  |
| More than secondary                           | 9.1                            | 14.3                         | 16.5                                        | 36.5                                  |

1  
2  
3 Within the group surveyed, cancer screening/assessment activities were limited: 2%  
4 (4/267) of female participants had a previous cervical smear/assessment, and 3%  
5 (6/182) of females >40 years had ever had a mammogram (**Table 3**). The prevalence  
6 of colonoscopy screening in those >50 years was 5% (9/200). In terms of healthcare  
7 access, 180 individuals (52%) had seen a primary healthcare doctor in the last year  
8 and were less likely to see a traditional healer during this period. Of all participants,  
9 110 reported being diagnosed with hypertension (32%), but most individuals were not  
10 on daily hypertensive medication (n=324, 94%). The use of other medications for  
11 primary prevention of NCDs, such as aspirin and anti-cholesterol medications, was  
12 also infrequent.  
13  
14  
15  
16  
17  
18  
19  
20  
21  
22  
23  
24  
25  
26  
27  
28  
29

**Table 3: Screening activities, access to medical services, and health conditions**

| Variable                                                | n (%)      |
|---------------------------------------------------------|------------|
| <b>Cancer screening</b>                                 |            |
| Cervical Cancer assessment<br>(if female > 21, n = 261) | 4 (1.5)    |
| Previous mammogram (if<br>female >40, n = 183)          | 6 (3.3)    |
| Previous colonoscopy (if >50<br>years, n = 190)         | 9 (4.5)    |
| <b>Last primary health care physician<br/>visit</b>     |            |
| <1 year ago                                             | 180 (52.0) |
| 1-4 years ago                                           | 93 (26.9)  |
| 5-10 years ago                                          | 32 (9.2)   |
| >10 years ago                                           | 41 (11.8)  |
| <b>Last time seen traditional healer</b>                |            |
| Never                                                   | 254 (73.4) |
| <2 years ago                                            | 66 (19.1)  |
| ≥2 years ago                                            | 26 (7.5)   |
| <b>Hypertension</b>                                     | 110 (31.8) |
| <b>Diabetes</b>                                         | 16 (4.6)   |
| <b>High cholesterol</b>                                 | 24 (6.9)   |
| <b>Stroke</b>                                           | 18 (5.2)   |
| <b>Alcohol use*</b>                                     |            |
| No                                                      | 227 (65.6) |
| Yes, drank in past, but quit                            | 65 (18.8)  |
| Yes, currently drink alcohol                            | 54 (15.6)  |

|                        |                                |            |
|------------------------|--------------------------------|------------|
| <b>Smoking status*</b> |                                |            |
|                        | Never                          | 303 (87.6) |
|                        | Ever                           | 43 (12.4)  |
| <b>Medication use</b>  |                                |            |
|                        | Reported anti-hypertensive use | 78 (22.5)  |
|                        | Reported aspirin use           | 89 (25.7)  |
|                        | Reported anti-cholesterol use  | 7 (2.0)    |
|                        | Reported herbal supplement use | 233 (67.3) |
|                        | Oral contraceptive use         |            |
|                        | Never                          | 175 (67.0) |
|                        | Past use                       | 64 (24.5)  |
|                        | Current use                    | 22 (8.4)   |

\* Participants were asked "Have you had 10 or more drinks of alcohol in your life?"

\* Participants were asked "Have you smoked 5 packs of cigarettes (100) or more in your lifetime?"

Only 15 individuals out of 346 (4%) had medical insurance (**Table 4**). For the remaining uninsured participants, 66% reported that they were unaware that health insurance existed. A further 73 participants (22%) stated that insurance was too difficult to access. Despite this, nearly half of those surveyed (n=160, 46%) reported a major medical cost in the last year, with the majority from unforeseen events, such as acute illness, trauma, or surgery (58%). The costs incurred ranged from 5000-1,500,000 Naira, with a median of 10,000 Naira, an amount that is more than the monthly income for ~45% of individuals in this study. In addition, 52 participants (33%) reported that their major medical costs were for chronic conditions. Overall individuals, with incomes in the lowest brackets (<50,000 Naira), accounted for most of those that incurred major medical costs in the last two years (74.4%), had more visits to their primary care doctor in the year (75.6%), and higher levels of hypertension (80.4%).

**Table 4: Insurance coverage and medical costs**

| Variable | n (%) |
|----------|-------|
|----------|-------|

|                                                     |                         |                        |
|-----------------------------------------------------|-------------------------|------------------------|
| <b>Insurance</b>                                    |                         |                        |
|                                                     | No                      | 331 (95.7)             |
|                                                     | Yes                     | 15 (4.3)               |
| <b>Last time used insurance</b>                     |                         |                        |
|                                                     | In the last 2 years     | 6 (40.0)               |
|                                                     | >2 years ago            | 9 (60.0)               |
| <b>How many family members covered by insurance</b> |                         |                        |
|                                                     | None                    | 331 (95.7)             |
|                                                     | 1-2                     | 8 (2.3)                |
|                                                     | 3-4                     | 3 (0.9)                |
|                                                     | 5 or more               | 4 (1.2)                |
| <b>Reasons for not having insurance (n=331)</b>     |                         |                        |
|                                                     | Expense                 | 32 (9.7)               |
|                                                     | Lack of coverage        | 13 (3.9)               |
|                                                     | Too difficult to access | 73 (22.1)              |
|                                                     | Other                   | 217 (65.6)             |
| <b>Major medical costs in the last 2 years</b>      |                         |                        |
|                                                     | No                      | 186 (53.8)             |
|                                                     | Yes                     | 160 (46.2)             |
| <b>Estimated amount</b>                             |                         |                        |
|                                                     | <10,000 Naira           | 73 (45.6)              |
|                                                     | 10,000-49,000 Naira     | 38 (23.8)              |
|                                                     | 50,000-99,999 Naira     | 16 (10.0)              |
|                                                     | >100,000 Naira          | 22 (13.8)              |
|                                                     | Unknown                 | 11 (6.9)               |
| <b>Reasons for major medical costs (n=158)</b>      |                         |                        |
|                                                     | Surgery                 | 17 (10.8)              |
|                                                     | Chronic conditions      | 52 (32.9)              |
|                                                     | Acute illness/trauma    | 74 (46.8)              |
|                                                     | Other/multiple reasons  | 15 (9.5)               |
| <b>Amount spent (continuous)</b>                    |                         |                        |
|                                                     | Overall median (range)  | 10,000 (50-1,500,000)  |
| <b>Median amount spent by reason (range)</b>        |                         |                        |
|                                                     | Surgery                 | 60,000 (7,000-150,000) |
|                                                     | Chronic conditions      | 18,000 (500-150,000)   |
|                                                     | Acute illness/trauma    | 5,000 (50-400,000)     |
|                                                     | Other/multiple reasons  | 70,000 (800-500,000)   |

Within eligible populations, we performed analysis to look for the association between cancer screening activity and income, insurance status and education **Table 5.**

Individuals with lower levels of income were less likely to have had cancer screening assessments. Cancer screening activity was more frequent in those with higher levels of education. No significant relationship was observed by insurance status or other factors that were assessed (gender, marital status, religion). In a multivariate logistic regression model including personal income, insurance status and education, the only statistically significant odds ratio for association with cancer screening activity was observed for personal income (personal income OR 2.7 95%CI 1.3-5.7  $p < 0.01$ , education level OR 1.7 95%CI 0.98-2.7  $p = 0.06$ , insurance status OR 4.3 95%CI 0.8-23.1  $p = 0.09$ ).

**Table 5: Association between Cancer Screening Activity and Income, Insurance and Education N =310\***

| Variable                                     | Cancer Screening (N=17) | No Cancer Screening (N=293) | P value* |
|----------------------------------------------|-------------------------|-----------------------------|----------|
| <b>Personal income (per month, in Naira)</b> |                         |                             |          |
| <10,000                                      | 2/138 (1.5)             | 140/138 (98.5)              | <0.01    |
| 10,000-49,999                                | 9/122 (7.4)             | 115/122 (92.6)              |          |
| >50,000                                      | 6/43 (14.0)             | 38/43 (86.0)                |          |
| <b>Family income (per month, in Naira)</b>   |                         |                             |          |
| <10,000                                      | 1/108 (0.9)             | 107/108 (99.1)              | <0.01    |
| 10,000-49,999                                | 8/129 (6.2)             | 121/129 (93.8)              |          |
| >50,000                                      | 8/66 (12.1)             | 58/66 (87.9)                |          |
| <b>Insurance Status</b>                      |                         |                             |          |
| No                                           | 15/290 (5.2)            | 275/290 (94.8)              | 0.12     |
| Yes                                          | 2/13 (15.4)             | 11/13 (84.6)                |          |
| <b>Education</b>                             |                         |                             |          |
| No formal education                          | 1/86 (1.2)              | 85/86 (98.8)                | 0.04     |
| Primary                                      | 3/83 (3.6)              | 80/83 (96.4)                |          |
| Secondary                                    | 8/78 (10.3)             | 70/78 (89.7)                |          |
| Higher                                       | 5/56 (8.9)              | 51/56 (91.1)                |          |

No association by Gender, Marital Status, Religion

\* Adjusted for eligible population, whereby cancer screening activities defined as history of cervical assessment in women >21 years, mammogram in women >40 years, and colonoscopy in all individuals >50 years

\* Fisher's exact test for association

## DISCUSSION

We performed a cross-sectional community-based study in Osun state, Nigeria to provide a snapshot of the challenges faced in the management of NCDs in the region. This study was conducted with an emphasis on cancer within broader research aims of identifying risk factors (lifestyle, diet, biological) associated with the rising cancer incidence in the region. We observed that screening assessment for breast, cervical, and colon cancer (the major contributors to cancer morbidity in the region),<sup>6 19 33</sup> were extremely low. This observation was despite a median age of 52 years and a high representation of females. In addition, <5% of the surveyed population possessed universal health care in the form of health insurance. We also found low incomes, high fertility rates, and evidence of poorly controlled chronic diseases, such as hypertension, in our cohort. The rates are comparable to national averages (suggesting our sample sits between the urban/rural divide)<sup>31</sup> and likely represent broad health and development deficiencies present in the community.

Previous studies conducted in the region<sup>34-42</sup> have demonstrated that poor access to cancer services is associated with late presentation and high incidence/mortality ratio.<sup>5 43</sup> This highlights a need to develop sound healthcare infrastructure, whereby individuals can be screened for asymptomatic disease and also adequately access services in a timely fashion when symptomatic. Our study identifies that screening activities may be lacking through either delivery and/or uptake, and that the potential cost implications of accessing treatment when symptoms arise, in the absence of adequate health insurance, can be high. The experience from other sub-Saharan African nations suggests that individuals seeking cancer services face significant barriers to access.<sup>35 36 44-47</sup> The Nigerian “National Cancer Control Plan 2018-2022,”



1  
2  
3 specifically details goals to make screening services and early detection of cancer  
4 available for all Nigerians, and to improve access to quality, cost-effective, and  
5 equitable diagnostic and treatment services for cancer care. This is centered around  
6 investment in eight public comprehensive cancer centers covering all geo-political  
7 zones, as well as the implementation of various screening strategies throughout  
8 different sectors of the healthsystem.<sup>20</sup>. Our results suggest that considerable work is  
9 required to reach the goal of “greater than 50% screening of ‘eligible populations’ by  
10 2022.”<sup>20</sup> We assessed cancer screening using measures that are recommended in  
11 this national plan. The methods we assessed are accessed at different levels of the  
12 healthcare system – cervical cancer assessment predominantly at a primary health  
13 care level, breast cancer at secondary/tertiary level through mammography, and  
14 colon cancer at tertiary level through colonoscopy. Whilst our analysis provides some  
15 idea of how individuals may have navigated the health system further detailed study  
16 is required to look at specific engagement at these different levels to inform  
17 appropriate resource allocation.  
18  
19  
20  
21  
22  
23  
24  
25  
26  
27  
28  
29  
30  
31  
32  
33  
34  
35  
36  
37  
38  
39

40 It is important to acknowledge that cancer screening in low and middle income  
41 countries requires measures tailored to local capacity and disease prevalence. For  
42 breast cancer, although mammography remains the gold standard for early detection  
43 of breast cancer, the Breast Health Global Initiative (BHGI) resource-stratified  
44 guidelines recommend clinical breast examination as a practical and necessary  
45 alternative for early detection in low-resource settings.<sup>19 45 48</sup> This has been  
46 recommended in local policy and was not assessed in the current study.<sup>20</sup> Despite  
47 this, with over 50 percent of individuals in this study visiting a primary health care  
48 doctor in the last year, our findings strongly support the need to concentrate cancer  
49  
50  
51  
52  
53  
54  
55  
56  
57  
58  
59  
60

1  
2  
3 screening efforts at primary healthcare where possible through the use of similar  
4 interventions. Colon cancer screening by colonoscopy for those over the age of fifty  
5 as recommended in high income countries does not exist in sufficient capacity for this  
6 to be recommended in an LMIC setting.<sup>49</sup> Efforts to intervene at primary healthcare  
7 level through the use of stool testing and symptom stratification are ongoing.<sup>50 51</sup>  
8 Overall, education, training and adequately resourcing community healthcare workers  
9 and physicians at primary healthcare level for cancer screening assessment is  
10 essential.  
11  
12  
13  
14  
15  
16  
17  
18  
19  
20  
21  
22  
23

24 We demonstrated that both income and medical expenditure relative to this level of  
25 income, compounded by the lack of universal health care coverage, must be factored  
26 into strategies laid out to address cancer control. The costs of the screening  
27 interventions assessed in this study relative to income, are prohibitive for the majority  
28 of individuals without government subsidy; approx. \$50 US ~ \$18000 Naira (for  
29 mammography), \$15 US ~ \$3000 Naira (cervical smear). This is compounded by the  
30 finding of only 4% of our cohort having health insurance coverage. In addition, major  
31 medical costs were incurred by over half of those interviewed, and a significant  
32 proportion of these costs were for chronic diseases (33%). Those individuals with the  
33 lowest income were more likely to report visits to the doctor, chronic disease, and  
34 significant “out of pocket” medical expenditures. The Nigerian national health  
35 insurance scheme (NHIS) has been in place since 2005. When it was introduced, state  
36 governments were instructed to adopt the program for their employees in the formal  
37 sector. After insuring government employees, state governments were instructed to  
38 expand coverage across all individuals with the goal of universal health coverage.<sup>14 15</sup>  
39 Recent reports confirm that this expansion has been limited in Nigeria. In line with  
40  
41  
42  
43  
44  
45  
46  
47  
48  
49  
50  
51  
52  
53  
54  
55  
56  
57  
58  
59  
60

1  
2  
3 previous studies, our data indicate that the NHIS is severely underutilized in the  
4 community population.<sup>15 16</sup> The state health insurance scheme has been instituted in  
5 only 2 out of 36 states of the federation at community level and this has not been the  
6 case in Osun state where the study took place.<sup>15</sup>  
7  
8  
9  
10  
11  
12  
13

14 We found wide range of “major” medical expenditure in our study group, with a median  
15 expenditure exceeding the monthly salary of ~45% of the group. It is important to note  
16 that we did not obtain information on total household expenditures to allow a relative  
17 assessment of the amount spent on medical costs, and, in turn, determine  
18 “catastrophic” costs.<sup>16</sup> However, based on income and demographic comparisons with  
19 other groups studied in the region, it is likely that catastrophic spending is high.<sup>52</sup>  
20 Further research into how the money to cover medical expenditure is generated (i.e.,  
21 personal savings, family savings, loans, etc.) is required. Taken together with prior  
22 work in the region<sup>53 54</sup>, it is evident that risk pooling and financial risk protection are  
23 required for the provision of preventative and therapeutic NCD health services.  
24  
25  
26  
27  
28  
29  
30  
31  
32  
33  
34  
35  
36  
37  
38  
39

40 Whilst we did not directly assess awareness of cancer screening, we did demonstrate  
41 an association between cancer screening activity and education level. Levels of  
42 education have been associated with awareness and accessing cancer services in  
43 previous studies.<sup>35 42 44 55</sup> In addition to this, we also found that ~75% of participants  
44 had access to radio and/or television within family and social networks, suggesting  
45 that mass communication channels to promote health awareness exist. In fact, these  
46 facilitated the current study when combined with strategies using mobile phone  
47 technologies. More broadly, these channels represent promising avenues to promote  
48 health and prevention of disease in the region.<sup>56</sup> In addition, “demand-side”  
49  
50  
51  
52  
53  
54  
55  
56  
57  
58  
59  
60

1  
2  
3 approaches to resource allocation, such as the stipend we provided for travel in the  
4 study or e-vouchers,<sup>57 58</sup> are likely to be well received by the community and may  
5  
6 promote uptake of health-screening activities.  
7  
8  
9

10  
11  
12 A strength of this study is that it was performed within the community and involved  
13 trained research staff fluent in the local dialect and used a validated questionnaire.  
14  
15 The study was performed in conjunction with local community healthcare workers and  
16 the tertiary referral hospital, which was intended to help residents develop an  
17 awareness of how and where healthcare can be accessed in the area and to establish  
18 a sustained relationship with this community. Limitations of this work include the  
19 potential for misclassification and recall bias, as we relied on individuals to  
20 retrospectively describe their own health and socioeconomic status as well as their  
21 interactions with healthcare services. Whilst we have documented low levels of  
22 screening activities and associations with income and education, we did not directly  
23 require individuals to state specifically their personal reasons for not being screened  
24 to delineate availability, awareness or finances. In addition, while the study sample  
25 was chosen at random and consecutive individuals were enrolled, the survey was  
26 conducted at a single time that was mid-week, during the day; this timing may have  
27 affected our sample composition (e.g., resulted in more females than males).  
28  
29 Nevertheless, overall consistency with national demographic indicators (e.g., income,  
30 education, and living conditions) indicates that our sample is likely reflective of rural  
31 community-dwelling individuals in the wider region.<sup>31 32</sup>  
32  
33  
34  
35  
36  
37  
38  
39  
40  
41  
42  
43  
44  
45  
46  
47  
48  
49  
50  
51  
52  
53  
54  
55

56 In summary, our results highlight infrequent cancer screening activities in a Nigerian  
57 community population and identifies areas that can be targeted to address this,  
58  
59  
60

1  
2  
3 including the use of measures focused at primary healthcare level, financial risk  
4  
5 protection, awareness, and strategic resource allocation.  
6  
7  
8  
9  
10  
11  
12  
13  
14  
15  
16  
17  
18  
19  
20  
21  
22  
23  
24  
25  
26  
27  
28  
29  
30  
31  
32  
33  
34  
35  
36  
37  
38  
39  
40  
41  
42  
43  
44  
45  
46  
47  
48  
49  
50  
51  
52  
53  
54  
55  
56  
57  
58  
59  
60

For peer review only

1  
2  
3 Ethical Approval Statement  
4  
5

6 The study was approved by the Obafemi Awolowo University institutional ethics review  
7 committee. Further details available directly from: Obafemi Awolowo University  
8  
9 Teaching Hospitals Complex, ILE-IFE, NIGERIA. Ethics and Research Committee  
10  
11  
12  
13  
14

15  
16 Mr. M.O. Adeyeye,  
17  
18 Head.Clinical Services and Training,  
19  
20 OAUTHC, Ile-Ife. 08032430923  
21

22 Or

23  
24 Ms. B. A. Ayoola 08068810690  
25  
26 Desk Officer, Ethics and Research Committee  
27  
28  
29  
30  
31  
32  
33  
34  
35  
36  
37  
38  
39  
40  
41  
42  
43  
44  
45  
46  
47  
48  
49  
50  
51  
52  
53  
54  
55  
56  
57  
58  
59  
60

## REFERENCES

1. Niessen LW, Mohan D, Akuoku JK, et al. Tackling socioeconomic inequalities and non-communicable diseases in low-income and middle-income countries under the Sustainable Development agenda. *Lancet* 2018;391(10134):2036-46. doi: 10.1016/s0140-6736(18)30482-3 [published Online First: 2018/04/09]
2. Ezzati M, Pearson-Stuttard J, Bennett JE, et al. Acting on non-communicable diseases in low- and middle-income tropical countries. *Nature* 2018;559(7715):507-16. doi: 10.1038/s41586-018-0306-9 [published Online First: 2018/07/27]
3. NCD Countdown 2030: worldwide trends in non-communicable disease mortality and progress towards Sustainable Development Goal target 3.4. *Lancet* 2018;392(10152):1072-88. doi: 10.1016/s0140-6736(18)31992-5 [published Online First: 2018/09/29]
4. GLOBOCAN 2018: counting the toll of cancer. *Lancet* 2018;392(10152):985. doi: 10.1016/s0140-6736(18)32252-9 [published Online First: 2018/09/29]
5. Bray F, Ferlay J, Soerjomataram I, et al. Global cancer statistics 2018: GLOBOCAN estimates of incidence and mortality worldwide for 36 cancers in 185 countries. *CA: A Cancer Journal for Clinicians* 2018;68(6):394-424. doi: 10.3322/caac.21492
6. Olaleye O, Ekrikpo U. Epidemiology of Cancers in Sub-Saharan Africa. In: Adedeji OA, ed. *Cancer in Sub-Saharan Africa: Current Practice and Future*. Cham: Springer International Publishing 2017:3-19.
7. Mostert S, Njuguna F, Olbara G, et al. Corruption in health-care systems and its effect on cancer care in Africa. *Lancet Oncol* 2015;16(8):e394-404. doi: 10.1016/s1470-2045(15)00163-1 [published Online First: 2015/08/08]
8. Harford JB. Barriers to overcome for effective cancer control in Africa. *Lancet Oncol* 2015;16(8):e385-93. doi: 10.1016/s1470-2045(15)00160-6 [published Online First: 2015/08/08]
9. Transforming our world : the 2030 Agenda for Sustainable Development: UN General Assembly; 21 October 2015 [Available from: <https://www.undp.org/content/undp/en/home/sustainable-development-goals.html> accessed 23 August 2019.
10. Douthit NT, Alemu HK. Social determinants of health: poverty, national infrastructure and investment. *BMJ Case Reports* 2016;2016:bcr2016215670. doi: 10.1136/bcr-2016-215670
11. Attia-Konan AR, Oga ASS, Touré A, et al. Distribution of out of pocket health expenditures in a sub-Saharan Africa country: evidence from the national survey of household standard of living, Côte d'Ivoire. *BMC Res Notes* 2019;12(1):25. doi: 10.1186/s13104-019-4048-z [published Online First: 2019/01/17]
12. Leive A, Xu K. Coping with out-of-pocket health payments: empirical evidence from 15 African countries. *Bull World Health Organ* 2008;86(11):849-56. doi: 10.2471/blt.07.049403 [published Online First: 2008/11/26]
13. Xu K, Evans DB, Kawabata K, et al. Household catastrophic health expenditure: a multicountry analysis. *Lancet* 2003;362(9378):111-7. doi: 10.1016/s0140-6736(03)13861-5 [published Online First: 2003/07/18]

14. Onoka CA, Onwujekwe OE, Uzochukwu BS, et al. Promoting universal financial protection: constraints and enabling factors in scaling-up coverage with social health insurance in Nigeria. *Health Res Policy Syst* 2013;11:20. doi: 10.1186/1478-4505-11-20 [published Online First: 2013/06/15]
15. Uzochukwu BS, Ughasoro MD, Etiaba E, et al. Health care financing in Nigeria: Implications for achieving universal health coverage. *Niger J Clin Pract* 2015;18(4):437-44. doi: 10.4103/1119-3077.154196 [published Online First: 2015/05/15]
16. Aregbeshola BS, Khan SM. Out-of-Pocket Payments, Catastrophic Health Expenditure and Poverty Among Households in Nigeria 2010. *Int J Health Policy Manag* 2018;7(9):798-806. doi: 10.15171/ijhpm.2018.19 [published Online First: 2018/10/15]
17. Jedy-Agba E, Curado MP, Ogunbiyi O, et al. Cancer incidence in Nigeria: a report from population-based cancer registries. *Cancer Epidemiol* 2012;36(5):e271-8. doi: 10.1016/j.canep.2012.04.007 [published Online First: 2012/05/25]
18. Awodele O, Adeyomoye AA, Awodele DF, et al. Cancer distribution pattern in south-western Nigeria. *Tanzan J Health Res* 2011;13(2):125-31. doi: 10.4314/thrb.v13i2.55226 [published Online First: 2011/04/01]
19. Ishola F, Omole O. A vision for improved cancer screening in Nigeria. *Lancet Glob Health* 2016;4(6):e359-60. doi: 10.1016/s2214-109x(16)30062-6 [published Online First: 2016/05/21]
20. Nigeria National Cancer Control Plan 2018 – 2022. Abuja: Federal Ministry of Health, Nigeria 2018.
21. World Bank staff estimates based on the United Nations Population Division's World Urbanization Prospects: 2018 Revision: The World Bank Group; [Available from: <https://data.worldbank.org/indicator/SP.RUR.TOTL.ZS> accessed November 2019.
22. Kingham TP, Alatise OI. Establishing Translational and Clinical Cancer Research Collaborations Between High- and Low-Income Countries. *Annals of Surgical Oncology* 2015;22(3):741-46. doi: 10.1245/s10434-014-4342-x
23. Irabor DO. Emergence of Colorectal Cancer in West Africa: Accepting the Inevitable. *Niger Med J* 2017;58(3):87-91. doi: 10.4103/0300-1652.234076 [published Online First: 2017/05/01]
24. National Population Commission (NPC) [Nigeria] and ICF International. 2014. Nigeria Demographic and Health Survey 2013. Abuja, Nigeria, and Rockville, Maryland, USA: NPC and ICF International. <https://dhsprogram.com/pubs/pdf/fr293/fr293.pdf> (Accessed February 14, 2018).
25. National Bureau of Statistics (NBS) - Federal Government of Nigeria. Nigeria - General Household Survey, Panel 2015-2016, Wave 3. <http://microdata.worldbank.org/index.php/catalog/2734/study-description> (Accessed February 15, 2018).
26. Cleland CL, Hunter RF, Kee F, et al. Validity of the global physical activity questionnaire (GPAQ) in assessing levels and change in moderate-vigorous physical activity and sedentary behaviour. *BMC Public Health* 2014;14:1255. doi: 10.1186/1471-2458-14-1255 [published Online First: 2014/12/11]
27. Colditz GA, Manson JE, Hankinson SE. The Nurses' Health Study: 20-year contribution to the understanding of health among women. *J Womens Health* 1997;6(1):49-62.
28. Hu FB, Satija A, Rimm EB, et al. Diet Assessment Methods in the Nurses' Health Studies and Contribution to Evidence-Based Nutritional Policies and Guidelines. *American*



- 1  
2  
3 *journal of public health* 2016;106(9):1567-72. doi: 10.2105/AJPH.2016.303348  
4 [published Online First: 2016/07/28]  
5  
6 29. Willett WC, Sampson L, Stampfer MJ, et al. REPRODUCIBILITY AND VALIDITY OF A  
7 SEMIQUANTITATIVE FOOD FREQUENCY QUESTIONNAIRE. *American Journal of*  
8 *Epidemiology* 1985;122(1):51-65. doi: 10.1093/oxfordjournals.aje.a114086  
9  
10 30. Wolf AM, Hunter DJ, Colditz GA, et al. Reproducibility and Validity of a Self-Administered  
11 Physical Activity Questionnaire. *International Journal of Epidemiology* 1994;23(5):991-  
12 99. doi: 10.1093/ije/23.5.991  
13  
14 31. Nigeria Demographic and Health Survey. Abuja, Nigeria: National Population Commission,  
15 Federal Republic of Nigeria, June 2014.  
16  
17 32. "Nigeria Country Briefing", Multidimensional Poverty Index Data Bank: Oxford Poverty  
18 and Human Development Initiative, University of Oxford.; 2017 [Available from:  
19 [www.ophi.org.uk/multidimensional-poverty-index/mpi-country-briefings/](http://www.ophi.org.uk/multidimensional-poverty-index/mpi-country-briefings/). accessed  
20 August 2019 2019.  
21  
22 33. Morhason-Bello IO, Odedina F, Rebbeck TR, et al. Challenges and opportunities in cancer  
23 control in Africa: a perspective from the African Organisation for Research and  
24 Training in Cancer. *Lancet Oncol* 2013;14(4):e142-51. doi: 10.1016/s1470-  
25 2045(12)70482-5 [published Online First: 2013/04/09]  
26  
27 34. Olasehinde O, Alatise OI, Arowolo OA, et al. Barriers to mammography screening in  
28 Nigeria: A survey of two communities with different access to screening facilities. *Eur*  
29 *J Cancer Care (Engl)* 2019;28(2):e12986. doi: 10.1111/ecc.12986 [published Online  
30 First: 2019/01/08]  
31  
32 35. McKenzie F, Zietsman A, Galukande M, et al. Breast cancer awareness in the sub-Saharan  
33 African ABC-DO cohort: African Breast Cancer—Disparities in Outcomes study. *Cancer*  
34 *Causes & Control* 2018;29(8):721-30. doi: 10.1007/s10552-018-1047-7  
35  
36 36. Makau-Barasa LK, Greene SB, Othieno-Abinya NA, et al. Improving Access to Cancer  
37 Testing and Treatment in Kenya. *Journal of Global Oncology* 2018(4):1-8. doi:  
38 10.1200/jgo.2017.010124  
39  
40 37. Ugwumba FO, Ekwueme OE, Okoh AD. Testicular Cancer and Testicular Self-Examination;  
41 Knowledge, Attitudes and Practice in Final Year Medical Students in Nigeria. *Asian Pac*  
42 *J Cancer Prev* 2016;17(11):4999-5003. doi: 10.22034/apjcp.2016.17.11.4999  
43 [published Online First: 2016/12/30]  
44  
45 38. Mbamara SU, Ikpeze OC, Okonkwo JE, et al. Knowledge, attitude and practice of cervical  
46 cancer screening among women attending gynecology clinics in a tertiary level  
47 medical care center in southeastern Nigeria. *J Reprod Med* 2011;56(11-12):491-6.  
48 [published Online First: 2011/12/27]  
49  
50 39. Wright KO, Kuyinu YA, Faduyile FA. Community education on cervical cancer amongst  
51 market women in an urban area of Lagos, Nigeria. *Asian Pac J Cancer Prev*  
52 2010;11(1):137-40. [published Online First: 2010/07/03]  
53  
54 40. Aniebue PN, Aniebue UU. Awareness and practice of cervical cancer screening among  
55 female undergraduate students in a Nigerian university. *J Cancer Educ* 2010;25(1):106-  
56 8. doi: 10.1007/s13187-009-0023-z [published Online First: 2010/01/19]  
57  
58 41. Ajape AA, Babata A, Abiola OO. Knowledge of prostate cancer screening among native  
59 African urban population in Nigeria. *Nig Q J Hosp Med* 2010;20(2):94-6. [published  
60 Online First: 2011/01/20]

- 1
- 2
- 3
- 4 42. Obiechina NJ, Mbamara SU. Knowledge attitude and practice of cervical cancer screening
- 5 among sexually active women in Onitsha, southeast Nigeria. *Niger J Med*
- 6 2009;18(4):384-7. [published Online First: 2010/02/03]
- 7 43. Kontis V, Mathers CD, Bonita R, et al. Regional contributions of six preventable risk factors
- 8 to achieving the 25 x 25 non-communicable disease mortality reduction target: a
- 9 modelling study. *Lancet Glob Health* 2015;3(12):e746-57. doi: 10.1016/s2214-
- 10 109x(15)00179-5 [published Online First: 2015/10/27]
- 11 44. Tiruneh FN, Chuang KY, Ntenda PAM, et al. Individual-level and community-level
- 12 determinants of cervical cancer screening among Kenyan women: a multilevel analysis
- 13 of a Nationwide survey. *BMC Womens Health* 2017;17(1):109. doi: 10.1186/s12905-
- 14 017-0469-9 [published Online First: 2017/11/17]
- 15 45. Masalu N, Serra P, Amadori D, et al. Setting up a community-based cervical screening
- 16 service in a low-income country: a pilot study from north-western Tanzania.
- 17 *International Journal of Public Health* 2017;62(7):755-62. doi: 10.1007/s00038-017-
- 18 0971-8
- 19 46. Kangmennaang J, Mkandawire P, Luginaah I. Breast cancer screening among women in
- 20 Namibia: explaining the effect of health insurance coverage and access to information
- 21 on screening behaviours. *Glob Health Promot* 2017;1757975917727017. doi:
- 22 10.1177/1757975917727017 [published Online First: 2017/09/26]
- 23 47. Stulac S, Binagwaho A, Tapela NM, et al. Capacity building for oncology programmes in
- 24 sub-Saharan Africa: the Rwanda experience. *Lancet Oncol* 2015;16(8):e405-13. doi:
- 25 10.1016/s1470-2045(15)00161-8 [published Online First: 2015/08/08]
- 26 48. Anderson BO, Yip CH, Smith RA, et al. Guideline implementation for breast healthcare in
- 27 low-income and middle-income countries: overview of the Breast Health Global
- 28 Initiative Global Summit 2007. *Cancer* 2008;113(8 Suppl):2221-43. doi:
- 29 10.1002/cncr.23844 [published Online First: 2008/09/26]
- 30 49. Knapp GC, Alatise OI, Olasehinde OO, et al. Is Colorectal Cancer Screening Appropriate in
- 31 Nigeria? *J Glob Oncol* 2019;5:1-10. doi: 10.1200/jgo.19.00035 [published Online First:
- 32 2019/06/07]
- 33 50. Alatise OI, Ayandipo OO, Adeyeye A, et al. A symptom-based model to predict colorectal
- 34 cancer in low-resource countries: Results from a prospective study of patients at high
- 35 risk for colorectal cancer. *Cancer* 2018;124(13):2766-73. doi: 10.1002/cncr.31399
- 36 [published Online First: 2018/04/13]
- 37 51. Knapp GC, Sharma A, Olopade B, et al. An Exploratory Analysis of Fecal Immunochemical
- 38 Test Performance for Colorectal Cancer Screening in Nigeria. *World J Surg*
- 39 2019;43(11):2674-80. doi: 10.1007/s00268-019-05100-0 [published Online First:
- 40 2019/08/14]
- 41 52. Olugbenga-Bello A, Adebimpe W. Knowledge and attitude of civil servants in Osun state,
- 42 Southwestern Nigeria towards the national health insurance. *Nigerian Journal of*
- 43 *Clinical Practice* 2010;13(4):421-26.
- 44 53. Dieleman JL, Sadat N, Chang AY, et al. Trends in future health financing and coverage:
- 45 future health spending and universal health coverage in 188 countries, 2016–40. *The*
- 46 *Lancet* 2018;391(10132):1783-98. doi: [https://doi.org/10.1016/S0140-](https://doi.org/10.1016/S0140-6736(18)30697-4)
- 47 [6736\(18\)30697-4](https://doi.org/10.1016/S0140-6736(18)30697-4)
- 48 54. Dieleman J, Campbell M, Chapin A, et al. Evolution and patterns of global health financing
- 49 1995–2014: development assistance for health, and government, prepaid private, and
- 50
- 51
- 52
- 53
- 54
- 55
- 56
- 57
- 58
- 59
- 60

- 1  
2  
3 out-of-pocket health spending in 184 countries. *The Lancet* 2017;389(10083):1981-  
4 2004. doi: [https://doi.org/10.1016/S0140-6736\(17\)30874-7](https://doi.org/10.1016/S0140-6736(17)30874-7)  
5  
6 55. Alatise OI, Fischer SE, Ayandipo OO, et al. Health-Seeking Behavior and Barriers to Care in  
7 Patients With Rectal Bleeding in Nigeria. *Journal of global oncology* 2017;3(6):749-56.  
8 doi: 10.1200/JGO.2016.006601 [published Online First: 2017/02/01]  
9  
10 56. Yang Q, Van Stee SK. The Comparative Effectiveness of Mobile Phone Interventions in  
11 Improving Health Outcomes: Meta-Analytic Review. *JMIR Mhealth Uhealth*  
12 2019;7(4):e11244. doi: 10.2196/11244 [published Online First: 2019/04/04]  
13  
14 57. Erwin E, Aronson KJ, Day A, et al. SMS behaviour change communication and eVoucher  
15 interventions to increase uptake of cervical cancer screening in the Kilimanjaro and  
16 Arusha regions of Tanzania: a randomised, double-blind, controlled trial of  
17 effectiveness. *BMJ Innovations* 2019:bmjinnov-2018-000276. doi: 10.1136/bmjinnov-  
18 2018-000276  
19  
20 58. Hurst TE, Semrau K, Patna M, et al. Demand-side interventions for maternal care: evidence  
21 of more use, not better outcomes. *BMC Pregnancy Childbirth* 2015;15:297. doi:  
22 10.1186/s12884-015-0727-5 [published Online First: 2015/11/17]  
23  
24  
25  
26  
27  
28  
29  
30  
31  
32  
33  
34  
35  
36  
37  
38  
39  
40  
41  
42  
43  
44  
45  
46  
47  
48  
49  
50  
51  
52  
53  
54  
55  
56  
57  
58  
59  
60

STROBE Statement—Checklist of items that should be included in reports of *cross-sectional studies*

|                              | Item No | Recommendation                                                                                                                                                                                    | Page No  |
|------------------------------|---------|---------------------------------------------------------------------------------------------------------------------------------------------------------------------------------------------------|----------|
| <b>Title and abstract</b>    | 1       | (a) Indicate the study's design with a commonly used term in the title or the abstract                                                                                                            | 4        |
|                              |         | (b) Provide in the abstract an informative and balanced summary of what was done and what was found                                                                                               | 4        |
| <b>Introduction</b>          |         |                                                                                                                                                                                                   |          |
| Background/rationale         | 2       | Explain the scientific background and rationale for the investigation being reported                                                                                                              | 8,9      |
| Objectives                   | 3       | State specific objectives, including any prespecified hypotheses                                                                                                                                  | 9        |
| <b>Methods</b>               |         |                                                                                                                                                                                                   |          |
| Study design                 | 4       | Present key elements of study design early in the paper                                                                                                                                           | 10,11    |
| Setting                      | 5       | Describe the setting, locations, and relevant dates, including periods of recruitment, exposure, follow-up, and data collection                                                                   | 10       |
| Participants                 | 6       | (a) Give the eligibility criteria, and the sources and methods of selection of participants                                                                                                       | 10       |
| Variables                    | 7       | Clearly define all outcomes, exposures, predictors, potential confounders, and effect modifiers. Give diagnostic criteria, if applicable                                                          | 10       |
| Data sources/<br>measurement | 8*      | For each variable of interest, give sources of data and details of methods of assessment (measurement). Describe comparability of assessment methods if there is more than one group              | 11       |
| Bias                         | 9       | Describe any efforts to address potential sources of bias                                                                                                                                         | 10,11    |
| Study size                   | 10      | Explain how the study size was arrived at                                                                                                                                                         | 10       |
| Quantitative variables       | 11      | Explain how quantitative variables were handled in the analyses. If applicable, describe which groupings were chosen and why                                                                      | 11       |
| Statistical methods          | 12      | (a) Describe all statistical methods, including those used to control for confounding                                                                                                             | 12,13    |
|                              |         | (b) Describe any methods used to examine subgroups and interactions                                                                                                                               | 12,13    |
|                              |         | (c) Explain how missing data were addressed                                                                                                                                                       | 13       |
|                              |         | (d) If applicable, describe analytical methods taking account of sampling strategy                                                                                                                | n/a      |
|                              |         | (e) Describe any sensitivity analyses                                                                                                                                                             | n/a      |
| <b>Results</b>               |         |                                                                                                                                                                                                   |          |
| Participants                 | 13*     | (a) Report numbers of individuals at each stage of study—eg numbers potentially eligible, examined for eligibility, confirmed eligible, included in the study, completing follow-up, and analysed | 13       |
|                              |         | (b) Give reasons for non-participation at each stage                                                                                                                                              | 13       |
|                              |         | (c) Consider use of a flow diagram                                                                                                                                                                | n/a      |
| Descriptive data             | 14*     | (a) Give characteristics of study participants (eg demographic, clinical, social) and information on exposures and potential confounders                                                          | 13,14    |
|                              |         | (b) Indicate number of participants with missing data for each variable of interest                                                                                                               | n/a      |
| Outcome data                 | 15*     | Report numbers of outcome events or summary measures                                                                                                                                              | 14,15,16 |

1  
2  
3  
4  
5  
6  
7  
8  
9  
10  
11  
12  
13  
14  
15  
16  
17  
18  
19  
20  
21  
22  
23  
24  
25  
26  
27  
28  
29  
30  
31  
32  
33  
34  
35  
36  
37  
38  
39  
40  
41  
42  
43  
44  
45  
46  
47  
48  
49  
50  
51  
52  
53  
54  
55  
56  
57  
58  
59  
60

|                          |    |                                                                                                                                                                                                              |       |
|--------------------------|----|--------------------------------------------------------------------------------------------------------------------------------------------------------------------------------------------------------------|-------|
| Main results             | 16 | (a) Give unadjusted estimates and, if applicable, confounder-adjusted estimates and their precision (eg, 95% confidence interval). Make clear which confounders were adjusted for and why they were included | 15,16 |
|                          |    | (b) Report category boundaries when continuous variables were categorized                                                                                                                                    | n/a   |
|                          |    | (c) If relevant, consider translating estimates of relative risk into absolute risk for a meaningful time period                                                                                             | n/a   |
| Other analyses           | 17 | Report other analyses done—eg analyses of subgroups and interactions, and sensitivity analyses                                                                                                               | n/a   |
| <b>Discussion</b>        |    |                                                                                                                                                                                                              |       |
| Key results              | 18 | Summarise key results with reference to study objectives                                                                                                                                                     | 21    |
| Limitations              | 19 | Discuss limitations of the study, taking into account sources of potential bias or imprecision. Discuss both direction and magnitude of any potential bias                                                   | 21-25 |
| Interpretation           | 20 | Give a cautious overall interpretation of results considering objectives, limitations, multiplicity of analyses, results from similar studies, and other relevant evidence                                   | 21-25 |
| Generalisability         | 21 | Discuss the generalisability (external validity) of the study results                                                                                                                                        | 21-25 |
| <b>Other information</b> |    |                                                                                                                                                                                                              |       |
| Funding                  | 22 | Give the source of funding and the role of the funders for the present study and, if applicable, for the original study on which the present article is based                                                | 1     |

\*Give information separately for exposed and unexposed groups.

**Note:** An Explanation and Elaboration article discusses each checklist item and gives methodological background and published examples of transparent reporting. The STROBE checklist is best used in conjunction with this article (freely available on the Web sites of PLoS Medicine at <http://www.plosmedicine.org/>, Annals of Internal Medicine at <http://www.annals.org/>, and Epidemiology at <http://www.epidem.com/>). Information on the STROBE Initiative is available at [www.strobe-statement.org](http://www.strobe-statement.org).

# BMJ Open

## Healthcare utilization, cancer screening and potential barriers to accessing cancer care in Rural South-West Nigeria: A cross-sectional study.

|                                 |                                                                                                                                                                                                                                                                                                                                                                                                                                                                                                                                                                                                                                                                                                                                                                                                                                |
|---------------------------------|--------------------------------------------------------------------------------------------------------------------------------------------------------------------------------------------------------------------------------------------------------------------------------------------------------------------------------------------------------------------------------------------------------------------------------------------------------------------------------------------------------------------------------------------------------------------------------------------------------------------------------------------------------------------------------------------------------------------------------------------------------------------------------------------------------------------------------|
| Journal:                        | <i>BMJ Open</i>                                                                                                                                                                                                                                                                                                                                                                                                                                                                                                                                                                                                                                                                                                                                                                                                                |
| Manuscript ID                   | bmjopen-2020-040352.R2                                                                                                                                                                                                                                                                                                                                                                                                                                                                                                                                                                                                                                                                                                                                                                                                         |
| Article Type:                   | Original research                                                                                                                                                                                                                                                                                                                                                                                                                                                                                                                                                                                                                                                                                                                                                                                                              |
| Date Submitted by the Author:   | 28-Jun-2021                                                                                                                                                                                                                                                                                                                                                                                                                                                                                                                                                                                                                                                                                                                                                                                                                    |
| Complete List of Authors:       | Sharma, Avinash; Memorial Sloan Kettering Cancer Center, Surgery<br>Alatise, Olusegun; Obafemi Awolowo University Teaching Hospital Complex<br>O'Connell, Kelli; Memorial Sloan Kettering Cancer Center, Epidemiology and Biostatistics<br>Gbenga, Ogunleye; Obafemi Awolowo University Teaching Hospital Complex, Surgery<br>Aderounmu, Adewale; Obafemi Awolowo University Teaching Hospital Complex, Surgery<br>Samson, Marquerite; Memorial Sloan Kettering Cancer Center, Epidemiology and Biostatistics<br>Wuraola, Funmilola; Obafemi Awolowo University Teaching Hospital Complex<br>Olasehinde, Olalekan; Obafemi Awolowo University Teaching Hospital Complex<br>Kingham, T; Memorial Sloan Kettering Cancer Center, Surgery<br>Du, Mengmeng; Memorial Sloan Kettering Cancer Center, Epidemiology and Biostatistics |
| <b>Primary Subject Heading</b>: | Global health                                                                                                                                                                                                                                                                                                                                                                                                                                                                                                                                                                                                                                                                                                                                                                                                                  |
| Secondary Subject Heading:      | Oncology, Health services research, Public health                                                                                                                                                                                                                                                                                                                                                                                                                                                                                                                                                                                                                                                                                                                                                                              |
| Keywords:                       | PUBLIC HEALTH, PREVENTIVE MEDICINE, Epidemiology < ONCOLOGY, Health policy < HEALTH SERVICES ADMINISTRATION & MANAGEMENT, Organisation of health services < HEALTH SERVICES ADMINISTRATION & MANAGEMENT, Health economics < HEALTH SERVICES ADMINISTRATION & MANAGEMENT                                                                                                                                                                                                                                                                                                                                                                                                                                                                                                                                                        |
|                                 |                                                                                                                                                                                                                                                                                                                                                                                                                                                                                                                                                                                                                                                                                                                                                                                                                                |

SCHOLARONE™  
Manuscripts



I, the Submitting Author has the right to grant and does grant on behalf of all authors of the Work (as defined in the below author licence), an exclusive licence and/or a non-exclusive licence for contributions from authors who are: i) UK Crown employees; ii) where BMJ has agreed a CC-BY licence shall apply, and/or iii) in accordance with the terms applicable for US Federal Government officers or employees acting as part of their official duties; on a worldwide, perpetual, irrevocable, royalty-free basis to BMJ Publishing Group Ltd ("BMJ") its licensees and where the relevant Journal is co-owned by BMJ to the co-owners of the Journal, to publish the Work in this journal and any other BMJ products and to exploit all rights, as set out in our [licence](#).

The Submitting Author accepts and understands that any supply made under these terms is made by BMJ to the Submitting Author unless you are acting as an employee on behalf of your employer or a postgraduate student of an affiliated institution which is paying any applicable article publishing charge ("APC") for Open Access articles. Where the Submitting Author wishes to make the Work available on an Open Access basis (and intends to pay the relevant APC), the terms of reuse of such Open Access shall be governed by a Creative Commons licence – details of these licences and which [Creative Commons](#) licence will apply to this Work are set out in our licence referred to above.

Other than as permitted in any relevant BMJ Author's Self Archiving Policies, I confirm this Work has not been accepted for publication elsewhere, is not being considered for publication elsewhere and does not duplicate material already published. I confirm all authors consent to publication of this Work and authorise the granting of this licence.

1  
2  
3 Healthcare utilization, cancer screening and potential barriers to accessing cancer  
4 care in Rural South-West Nigeria: A cross-sectional study.  
5  
6  
7  
8  
9

10 Sharma A. MD<sup>1</sup>, Alatise O. I. MBChB<sup>2</sup>, O'Connell K. MSc<sup>3</sup>, Ogunleye S.G. MSc<sup>2</sup>,  
11 Aderounmu A.A. MBChB<sup>2</sup>, Samson. M.L. BSc<sup>3</sup>, Wuraola F. MBChB<sup>2</sup>, Olasehinde O.  
12 MBChB, Kingham T.P MD<sup>1</sup>, Du M. ScD<sup>3</sup>  
13  
14  
15  
16  
17  
18

19 <sup>1</sup>Department of Surgery, Memorial Sloan Kettering Cancer Center, New York, NY;  
20 <sup>2</sup>Obafemi Awolowo University, Ile-Ife, Nigeria; <sup>3</sup>Department of Epidemiology and  
21 Biostatistics, Memorial Sloan Kettering Cancer Center, New York, NY. African  
22 Research Group for Oncology (ARGO).  
23  
24  
25  
26  
27  
28  
29

30 **Acknowledgments:** The authors would like to acknowledge the dedicated research  
31 team at OAUTHC for their efforts in this project, the local community leaders and  
32 healthcare workers, as well as the support from Prof. Adesgun Fatusi and his research  
33 staff.  
34  
35  
36  
37  
38  
39  
40  
41  
42  
43  
44

45 **Correspondence:**

46 Avinash Sharma

47 Memorial Sloan Kettering Cancer Center

48 1275 York Avenue, C-886

49 New York, NY 10065

50 [avinash.s.sharma@gmail.com](mailto:avinash.s.sharma@gmail.com)  
51  
52  
53  
54  
55  
56  
57  
58  
59  
60



## ABSTRACT

**Background/Aims:** Cancer burden is predicted to double by 2030 in sub-Saharan Africa; access to healthcare services for cancer management is a priority in the region. In Nigeria, National Cancer Control Plan aims to ensure >50% cancer screening of eligible populations by 2022 for all Nigerians. We describe healthcare utilization, cancer screening activities and potential barriers to accessing cancer care within an understudied rural community-based adult population in South-West Nigeria.

**Methods:** In April 2018, we conducted a cross-sectional study of community-based adults (>18 years) ~130 kilometres east of Ibadan, 250 km from Lagos in Osun State, South-West Nigeria. Participants completed a face-to-face survey in local dialect. We used a questionnaire to assess demographics, health status, income, medical expenditures, doctor visits, and cancer screening history.

**Results:** We enrolled 346 individuals; with median age of 52 years, and 75% female. Of the entire cohort, 4% had medical insurance. 46% reported a major medical cost in the last year. Cancer screening activities were infrequent in eligible participants: 1.5% reported having had cervical cancer screening, 3.3% mammogram, and 5% colonoscopy screening. Cancer screening assessment was less frequent in those with less income and lower education levels. Using a multivariable logistic regression model including personal income, insurance status, and education, higher personal income was associated with more cancer screening activity (OR 2.7 95%CI 1.3-5.7  $p<0.01$ ). Despite this, most individuals had contact with a primary health care doctor (52% in the last year), and over 70% access to radio and TV suggesting the opportunity to expand community-based screening interventions and awareness exists.

1  
2  
3 **Conclusions:** Despite national increases in cancer cases, we highlight a deficiency  
4 in cancer screening and universal healthcare coverage within a community-based  
5 adult Nigerian population. Subject to availability of governmental resources, increasing  
6 financial risk protection, awareness, and targeted resource allocation may help  
7 expand access in Nigeria.  
8  
9  
10  
11  
12  
13  
14  
15  
16

17 **Keywords:** Non-communicable disease, Sub-Saharan Africa, Cancer, Universal  
18 Healthcare, Screening  
19  
20  
21  
22  
23

#### 24 **Strengths and Limitations of the study:**

25  
26  
27

- 28 1) Rigorously trained interviewers fluent in the local dialect collected  
29 contemporary perspectives of potential barriers to accessing medical and  
30 cancer care in a crucially understudied population in rural South-West Nigeria.  
31  
32  
33  
34  
35  
36  
37
- 38 2) Questionnaire items derived by adapting features from validated and/or widely  
39 implemented local or nationwide surveys and tailored to the local population in  
40 collaboration with local clinicians, epidemiologists, and nutritionists.  
41  
42  
43  
44  
45  
46  
47
- 48 3) Study conducted in conjunction with local community healthcare workers and  
49 the regional tertiary referral hospital to help build capacity, increase healthcare  
50 awareness, and establish a sustained relationship with these rural  
51 communities.  
52  
53  
54  
55  
56  
57  
58  
59  
60

1  
2  
3 4) Potential for measurement error or recall bias, as we relied on individuals to  
4  
5 retrospectively describe their own health and socioeconomic status as well as  
6  
7 their interactions with healthcare services.  
8  
9

10  
11  
12  
13 5) Survey conducted at a single time (mid-week, during the day) in two geographic  
14  
15 locations, which may have affected sample composition (e.g., more females  
16  
17 than males).  
18  
19  
20  
21  
22  
23  
24  
25  
26  
27  
28  
29  
30  
31  
32  
33  
34  
35  
36  
37  
38  
39  
40  
41  
42  
43  
44  
45  
46  
47  
48  
49  
50  
51  
52  
53  
54  
55  
56  
57  
58  
59  
60

## INTRODUCTION

The burden of non-communicable disease (NCD), in particular cancer, in sub-Saharan Africa is well documented.<sup>1-3</sup> According to recent International Agency for Research on Cancer GLOBOCAN estimates, by 2030, 75% of new cancer cases will be within low and middle-income countries.<sup>4,5</sup> In sub-Saharan Africa, despite the fact that cancer burden is predicted to double by 2030, the entire region accounts for <1% of worldwide medical cancer expenditures.<sup>6-8</sup> Central to addressing the growing burden of cancer in sub-Saharan Africa is the need to improve access to cancer care services for screening, prevention, and treatment.<sup>9</sup>

NCDs, including cancer, threaten to overwhelm fragile health systems in sub-Saharan Africa and lead to dramatic rises in health and social care costs in the near-term.<sup>7, 10</sup> In the region, out-of-pocket health expenditures are a major contributor to poverty<sup>11-13</sup>, and a lack of adequate social protection has the potential to drive families and individuals further into poverty. In Nigeria, universal healthcare coverage in the form of the National Health Insurance Scheme (NHIS) was implemented in 2005, with an overarching goal of universal health coverage for all Nigerians.<sup>14</sup> However, uptake has been limited and restricted,<sup>15</sup> and as a result, the large majority of Nigerians still face significant financial burden when healthcare needs arise.<sup>15, 16</sup>

In Nigeria cancer incidence and mortality is increasing and women have a higher cancer incidence than men.<sup>17</sup> The most common forms of cancer in Nigeria are breast and cervical, with these accounting for over 50 percent of cancer deaths.<sup>17-19</sup> Regionally, the need to improve access to cancer services for early detection has been recognised, with a focus on these cancers. In 2018, Nigeria launched the “National

1  
2  
3 Cancer Control Plan 2018-2022,” with the goal to make screening services available  
4 for all Nigerians, and at least “greater than 50% screening of all eligible populations  
5 by 2022.”<sup>20</sup> Despite this, the current state of cancer screening activities and barriers  
6 to care in this region (esp. rural areas) are not well-defined or documented. This gap  
7 limits our ability to define actionable steps towards improving access and achieving  
8 the established screening goal. National programmes for screening breast and  
9 cervical cancer are lacking. Typically, screening interactions occur at primary health  
10 care facilities or community health clinics – often for women when they are being seen  
11 during pregnancy or for other related health issues such as immunisations. Screening  
12 services for cervical and breast cancer have been implemented sporadically by both  
13 government and non-government organisations but predominantly in urban areas.  
14 The overwhelming majority of individuals in the region are symptomatic when they  
15 present with disease. With 50 percent of Nigeria’s population living in rural areas<sup>21</sup> we  
16 hypothesize that unique challenges may exist for individuals in these communities,  
17 where nationwide initiatives may have limited reach.  
18  
19  
20  
21  
22  
23  
24  
25  
26  
27  
28  
29  
30  
31  
32  
33  
34  
35  
36  
37  
38  
39

40 This study aimed to describe potential barriers to accessing cancer care within a rural  
41 community-based adult population in South-West Nigeria. This study was performed  
42 as part of a broader community-based capacity building project in South-West  
43 Nigeria<sup>22</sup> investigating potentially modifiable cancer risk factors in the setting of rising  
44 rates of cancer in the region.<sup>6 19 20 23</sup> Herein, we report health insurance coverage and  
45 socioeconomic status in relation to health conditions, health expenditures, cancer  
46 screening assessment and provide a snapshot of the health needs and burden faced  
47 by individuals in the region.  
48  
49  
50  
51  
52  
53  
54  
55  
56  
57  
58  
59  
60

## METHODS

During April 2018, a cross-sectional study of community-based adults was conducted in Osun State, South-West Nigeria. Two rural towns Ijebu-Jesa and Ere-Jesa, (approximately 130 kilometers east of Ibadan, 250 km from Lagos, on latitude 7.45 degrees north within the rain forest belt), were selected at random. These towns were in proximity to Obafemi Awolowo University Teaching Hospital Complex, Ile-Ife, the main tertiary referral center in the region. This study was part of a broader capacity building project in the region to improve cancer care and prevention in this understudied population. It served as a baseline study to assess access to cancer services as well as a pilot study to explore endemic risk factors for cancer – such as unique dietary, exercise and environmental exposures.

### *Patient and Public Involvement*

Prior to the study, local community leaders in the towns were contacted, and the goals of the research were explained. In the time leading up to the study, healthcare workers and community leaders notified and mobilized all potential participants in the two communities. They were also involved in the design of the study and in disseminating the results to all participants. Participants were notified of the study through discussion at the weekly local community meetings in the month leading up to the study, advertisements on local radio-stations and through community workers visiting regional sites.

### *Participants*

1  
2  
3 Adults >18 years in the two towns were invited to participate. Adult participants were  
4  
5 consecutively enrolled upon arrival at pre-designated locations (main town hall) in the  
6  
7 two towns. Sample size for this study was therefore based on resource capacity of  
8  
9 each town hall, available number of interviewers to administer the questionnaire, and  
10  
11 the size of each rural community in which we recruited; enrolment was capped at a  
12  
13 maximum of 300 participants at Ijebu-Jesa and 100 at Ere-Jesa over the recruitment  
14  
15 period. All study participants received blood pressure checks, and health promotion  
16  
17 talks were held for those waiting to be surveyed. Study participants were given a small  
18  
19 stipend to cover their transportation costs to the study venue on the study day (300  
20  
21 Naira, ~80 US cents). This amount was determined by local healthcare workers.  
22  
23  
24  
25  
26  
27  
28

### 29 *Questionnaire*

30  
31 The survey consisted of a questionnaire to gather quantitative data on demographics,  
32  
33 health status, income, medical expenditures, dietary habits, physical activity, family  
34  
35 history, screening history, medical history, reproductive history, primary healthcare  
36  
37 visits, medication use, and environmental exposures. (See supplementary file). The  
38  
39 questionnaire used was developed in collaboration with local clinicians,  
40  
41 epidemiologists, and nutritionists, and was derived by adapting features from validated  
42  
43 and/or widely implemented local or nationwide surveys. This included the Nigeria  
44  
45 Demographic and Health Survey,<sup>24</sup> Nigeria General Household Survey,<sup>25</sup> World  
46  
47 Health Organization-endorsed Global Physical Activity Questionnaire,<sup>26</sup> and the  
48  
49 Nurses' Health Study questionnaire.<sup>27-30</sup> We therefore did not additionally test for  
50  
51 reliability and our study was intended to capture a cross-sectional snapshot of our rural  
52  
53 communities. However, we expect low social mobility in our two rural Nigerian towns  
54  
55  
56  
57  
58  
59  
60

1  
2  
3 and therefore limited changes over time for the sociodemographic features collected  
4  
5 in our questionnaire.  
6  
7  
8  
9

### 10 *Data collection*

11  
12 After obtaining informed consent, the study participants underwent a 50-60 minute  
13  
14 one-on-one, face-to-face survey conducted in the local Yoruba dialect by a trained  
15  
16 research assistant. All research assistants underwent a two-day training program that  
17  
18 involved education into the research aims, methodology, and ethics as well as  
19  
20 interview techniques through role playing exercises, pilot testing of the questionnaire  
21  
22 and the use of electronic tablets for recording data.  
23  
24  
25  
26  
27

### 28 *Outcome measures*

29  
30 Cancer screening activities in screen-eligible individuals included history of cervical  
31  
32 examination and screening test in women >21 years, mammogram in women >40  
33  
34 years, and colonoscopy in all individuals >50 years. Because cervical cancer  
35  
36 screening intervention was self-reported, screening could be by pap smear or visual  
37  
38 inspection with acetic acid or Lugo's iodine (VIA/VILI). This could be conducted in a  
39  
40 primary healthcare setting. Manual breast examination by a health care worker was  
41  
42 not captured and therefore the assessed intervention evaluated management at local  
43  
44 secondary and tertiary health care facilities. All of the assessed interventions were  
45  
46 screening activities specified as part of the Nigerian National Cancer Control Plan  
47  
48 2018-2022. Medical expenses were defined as any 'major medical costs' as perceived  
49  
50 by the study participant on direct questioning. This was clarified by recording the  
51  
52 amount spent in Naira, and the medical reason for the expenditure was also  
53  
54 documented. Demographic and socioeconomic data collected from our study  
55  
56  
57  
58  
59  
60



1  
2  
3 population were compared to data from the Nigerian Demographic and Health Survey  
4 and the Oxford Poverty Health Indicator <sup>31 32</sup> to assess external validity.  
5  
6  
7  
8  
9

### 10 *Statistical analysis*

11  
12 Data were summarized in the form of proportions and frequency tables for categorical  
13 variables. Continuous variables were summarized using mean, median, and standard  
14 deviation. Comparisons of discrete variables were computed using Fisher's exact test  
15 and multiple logistic regression. Missing data were not possible for completed  
16 questionnaires as only complete responses to questions could be processed in order  
17 to advance the survey on the electronic tablets. All analyses were conducted using  
18 SAS software version 9.4 (SAS Institute Inc., Cary, NC)  
19  
20  
21  
22  
23  
24  
25  
26  
27  
28  
29  
30  
31  
32

## 33 **RESULTS**

34  
35  
36  
37 A total of 346 individuals were consecutively enrolled in the study and interviewed  
38 during the recruitment period. All individuals that were interviewed provided data for  
39 analysis. The demographic features of the group are presented in **Table 1**. The  
40 majority of participants were Yoruba speaking (n=332, 96%) and married (n=213,  
41 62%) with a median age of 52 years. Females accounted for 75% of the cohort  
42 (n=261). Most individuals had some form of education, with 166 participants (48%)  
43 reporting more than primary school education. In addition, 30 participants (9%)  
44 reported being unemployed. Of female participants, 70% had  $\geq 4$  live births.  
45  
46  
47  
48  
49  
50  
51  
52  
53  
54  
55  
56  
57

### 58 **Table 1: Demographic characteristics of the study group (n=346)**

59 **(n=268 Ijebu-Jesa, n=68 Ere-Jesa)**  
60

| Variable                                      | n (%)       |
|-----------------------------------------------|-------------|
| <b>Median Age, years (range)</b>              | 52 (18-100) |
| <b>Sex</b>                                    |             |
| Male                                          | 85 (24.6)   |
| Female                                        | 261 (75.4)  |
| <b>Marital Status</b>                         |             |
| Single                                        | 27 (7.8)    |
| Married                                       | 213 (61.6)  |
| Other (Divorced/cohabiting)                   | 106 (30.6)  |
| <b>Tribe</b>                                  |             |
| Yoruba                                        | 332 (96.0)  |
| Ibo                                           | 5 (1.4)     |
| Other                                         | 9 (2.6)     |
| <b>Religion</b>                               |             |
| Christian                                     | 326 (94.2)  |
| Muslim                                        | 19 (5.5)    |
| Other                                         | 1 (0.3)     |
| <b>Education</b>                              |             |
| No formal education                           | 88 (25.4)   |
| Primary                                       | 92 (26.6)   |
| Secondary                                     | 92 (26.6)   |
| Vocational/Technical                          | 45 (13.0)   |
| Higher                                        | 29 (8.4)    |
| <b>Occupation</b>                             |             |
| Unemployed                                    | 30 (8.7)    |
| Civil servant                                 | 30 (8.7)    |
| Trader                                        | 123 (35.5)  |
| Farmer                                        | 35 (10.1)   |
| Self-employed                                 | 80 (23.1)   |
| Other                                         | 48 (13.9)   |
| <b>Number of Live Births (Females, n=242)</b> |             |
| 0                                             | 6 (2.5)     |
| 1                                             | 15 (6.2)    |
| 2                                             | 23 (9.5)    |
| 3                                             | 28 (11.6)   |
| 4                                             | 54 (22.3)   |
| 5 or more                                     | 116 (47.9)  |

Overall, 155 participants (45%) had a personal monthly income of <10,000 Naira (~1 USD per day), and 134 individuals (76%) had a family monthly income of <50,000 Naira (140 USD per month) (**Table 2a**). In addition, 198 participants (57%) lived in a

1  
2  
3 family home or owned an apartment. The majority of participants (92%) reported  
4  
5 having access to electricity, and over 70% reported access to television (76%) or radio  
6  
7 (73%).  
8  
9

10  
11  
12 To assess the comparability of our results to the general Nigerian population, we  
13  
14 compared the data from our study population to that recorded in the Nigerian  
15  
16 Demographic and Health Survey (**Table 2b**).<sup>31</sup> Both groups had similar degrees of  
17  
18 education at the primary level for males and females, but overall there were fewer  
19  
20 uneducated males and females within our surveyed population when compared to  
21  
22 national averages. Our surveyed group also had better access to electricity, radio, and  
23  
24 television compared to the national survey group (rural). When compared to equivalent  
25  
26 parameters for Nigeria from the multi-dimensional poverty index (MPI) developed by  
27  
28 the Oxford Poverty and Human Development Initiative,<sup>32</sup> our study population had  
29  
30 similar levels of deprivation for years of schooling (defined as <6 years of school) and  
31  
32 electricity (defined as no household electricity).  
33  
34  
35  
36  
37  
38  
39

40 **Table 2a: Income and household conditions**

| Variable                                     | n (%)      |
|----------------------------------------------|------------|
| <b>Personal income (per month, in Naira)</b> |            |
| <10,000                                      | 155 (44.8) |
| 10,000-49,999                                | 139 (40.2) |
| 50,000-99,999                                | 26 (7.5)   |
| 100,000-249,999                              | 16 (4.6)   |
| 250,000-499,999                              | 9 (2.6)    |
| ≥500,000                                     | 1 (0.3)    |
| <b>Family income (per month, in Naira)</b>   |            |
| <10,000                                      | 117 (33.8) |
| 10,000-49,999                                | 147 (42.5) |
| 50,000-99,999                                | 38 (11.0)  |
| 100,000-249,999                              | 28 (8.1)   |
| 250,000-499,999                              | 11 (3.2)   |
| ≥500,000                                     | 5 (1.4)    |

|                         |                      |            |
|-------------------------|----------------------|------------|
| <b>Type of dwelling</b> |                      |            |
|                         | Own apartment        | 131 (37.9) |
|                         | Rent apartment       | 146 (42.2) |
|                         | Family house         | 67 (19.4)  |
|                         | Other                | 2 (0.6)    |
| <b>Type of toilet</b>   |                      |            |
|                         | Water system         | 151 (43.6) |
|                         | Pit latrine          | 164 (47.4) |
|                         | Bush                 | 23 (6.6)   |
|                         | Bucket               | 7 (2.0)    |
|                         | Other                | 1 (0.3)    |
| <b>Water source</b>     |                      |            |
|                         | Pipe borne/boreholes | 185 (53.5) |
|                         | Well                 | 146 (42.2) |
|                         | River                | 15 (4.3)   |
| <b>Appliances</b>       |                      |            |
|                         | Electricity          | 318 (91.9) |
|                         | Television           | 262 (75.7) |
|                         | Radio                | 251 (72.5) |
|                         | Refrigerator         | 154 (44.5) |
|                         | Air conditioner      | 8 (2.3)    |
|                         | Generating set       | 99 (28.6)  |
|                         | Personal computer    | 38 (11.0)  |
|                         | None                 | 18 (5.2)   |

**Table 2b: Comparison between study sample characteristics and 2013 Nigerian National Demographic and Health Survey (NDHS)**

|                                               | NDHS<br>Urban<br>(%) | NDHS<br>Rural<br>(%) | NDHS<br>Total<br>(%) | Current study<br>(%) |
|-----------------------------------------------|----------------------|----------------------|----------------------|----------------------|
| <b>Cooking Fuel</b>                           |                      |                      |                      |                      |
| Electricity                                   | 0.7                  | 0.2                  | 0.4                  | 10.7                 |
| Liquefied petroleum gas/natural<br>Gas/biogas | 4.6                  | 0.5                  | 2.3                  | 21.1                 |
| Kerosene                                      | 47.6                 | 8.7                  | 25.5                 | 31.8                 |
| Charcoal                                      | 5.3                  | 1.6                  | 3.2                  | 2.3                  |
| Wood                                          | 37.9                 | 83.3                 | 63.7                 | 34.1                 |
| <b>Electricity</b>                            |                      |                      |                      |                      |
| Yes                                           | 83.6                 | 34.4                 | 55.6                 | 91.9                 |
| No                                            | 16.3                 | 65.4                 | 44.2                 | 8.1                  |
| Missing                                       | 0.1                  | 0.2                  | 0.2                  | 0                    |
| <b>Household Appliances</b>                   |                      |                      |                      |                      |
| Radio                                         | 77.7                 | 61.3                 | 68.3                 | 72.5                 |
| Television                                    | 73.2                 | 28.2                 | 47.6                 | 75.7                 |
| Refrigerator                                  | 32.5                 | 7.5                  | 18.3                 | 44.5                 |
| <b>Means of Transportation</b>                |                      |                      |                      |                      |
| Bicycle                                       | 12.7                 | 18.3                 | 18.3                 | 0.9                  |
| Motorcycle/scooter                            | 27.0                 | 31.2                 | 31.2                 | 15.0                 |
| Car/truck                                     | 14.4                 | 8.7                  | 8.7                  | 12.1                 |

| Education           | NDHS<br>Female<br>(%) | NDHS<br>Male<br>(%) | Current<br>study<br>Female<br>(%) | Current study<br>Male<br>(%) |
|---------------------|-----------------------|---------------------|-----------------------------------|------------------------------|
| No formal education | 37.8                  | 21.2                | 28.7                              | 15.3                         |
| Primary             | 17.3                  | 16.7                | 26.8                              | 25.9                         |
| Secondary           | 35.8                  | 47.7                | 28.0                              | 22.4                         |
| More than secondary | 9.1                   | 14.3                | 16.5                              | 36.5                         |

Within the group surveyed, cancer screening/assessment activities were limited: 2% (4/267) of female participants had a previous cervical smear/assessment, and 3% (6/182) of females >40 years had ever had a mammogram (**Table 3**). The prevalence of colonoscopy screening in those >50 years was 5% (9/200). In terms of healthcare access, 180 individuals (52%) had seen a primary healthcare doctor in the last year and were less likely to see a traditional healer during this period. Of all participants, 110 reported being diagnosed with hypertension (32%), but most individuals were not on daily hypertensive medication (n=324, 94%). The use of other medications for primary prevention of NCDs, such as aspirin and anti-cholesterol medications, was also infrequent.

**Table 3: Screening activities, access to medical services, and health conditions**

| Variable                                                | n (%)      |
|---------------------------------------------------------|------------|
| <b>Cancer screening</b>                                 |            |
| Cervical Cancer assessment<br>(if female > 21, n = 261) | 4 (1.5)    |
| Previous mammogram (if<br>female >40, n = 183)          | 6 (3.3)    |
| Previous colonoscopy (if >50<br>years, n = 190)         | 9 (4.5)    |
| <b>Last primary health care physician<br/>visit</b>     |            |
| <1 year ago                                             | 180 (52.0) |
| 1-4 years ago                                           | 93 (26.9)  |
| 5-10 years ago                                          | 32 (9.2)   |
| >10 years ago                                           | 41 (11.8)  |
| <b>Last time seen traditional healer</b>                |            |

|                         |                                |            |
|-------------------------|--------------------------------|------------|
|                         | Never                          | 254 (73.4) |
|                         | <2 years ago                   | 66 (19.1)  |
|                         | ≥2 years ago                   | 26 (7.5)   |
| <b>Hypertension</b>     |                                | 110 (31.8) |
| <b>Diabetes</b>         |                                | 16 (4.6)   |
| <b>High cholesterol</b> |                                | 24 (6.9)   |
| <b>Stroke</b>           |                                | 18 (5.2)   |
| <b>Alcohol use*</b>     |                                |            |
|                         | No                             | 227 (65.6) |
|                         | Yes, drank in past, but quit   | 65 (18.8)  |
|                         | Yes, currently drink alcohol   | 54 (15.6)  |
| <b>Smoking status*</b>  |                                |            |
|                         | Never                          | 303 (87.6) |
|                         | Ever                           | 43 (12.4)  |
| <b>Medication use</b>   |                                |            |
|                         | Reported anti-hypertensive use | 78 (22.5)  |
|                         | Reported aspirin use           | 89 (25.7)  |
|                         | Reported anti-cholesterol use  | 7 (2.0)    |
|                         | Reported herbal supplement use | 233 (67.3) |
|                         | Oral contraceptive use         |            |
|                         | Never                          | 175 (67.0) |
|                         | Past use                       | 64 (24.5)  |
|                         | Current use                    | 22 (8.4)   |

\* Participants were asked "Have you had 10 or more drinks of alcohol in your life?"

\* Participants were asked "Have you smoked 5 packs of cigarettes (100) or more in your lifetime?"

Only 15 individuals out of 346 (4%) had medical insurance (**Table 4**). For the remaining uninsured participants, 66% reported that they were unaware that health insurance existed. A further 73 participants (22%) stated that insurance was too difficult to access. Despite this, nearly half of those surveyed (n=160, 46%) reported a major medical cost in the last year, with the majority from unforeseen events, such as acute illness, trauma, or surgery (58%). The costs incurred ranged from 5000-1,500,000 Naira, with a median of 10,000 Naira, an amount that is more than the monthly income for ~45% of individuals in this study. In addition, 52 participants (33%) reported that their major medical costs were for chronic conditions. Overall individuals,

with incomes in the lowest brackets (<50,000 Naira), accounted for most of those that incurred major medical costs in the last two years (74.4%), had more visits to their primary care doctor in the year (75.6%), and higher levels of hypertension (80.4%).

**Table 4: Insurance coverage and medical costs**

| Variable                                            | n (%)                  |
|-----------------------------------------------------|------------------------|
| <b>Insurance</b>                                    |                        |
| No                                                  | 331 (95.7)             |
| Yes                                                 | 15 (4.3)               |
| <b>Last time used insurance</b>                     |                        |
| In the last 2 years                                 | 6 (40.0)               |
| >2 years ago                                        | 9 (60.0)               |
| <b>How many family members covered by insurance</b> |                        |
| None                                                | 331 (95.7)             |
| 1-2                                                 | 8 (2.3)                |
| 3-4                                                 | 3 (0.9)                |
| 5 or more                                           | 4 (1.2)                |
| <b>Reasons for not having insurance (n=331)</b>     |                        |
| Expense                                             | 32 (9.7)               |
| Lack of coverage                                    | 13 (3.9)               |
| Too difficult to access                             | 73 (22.1)              |
| Other                                               | 217 (65.6)             |
| <b>Major medical costs in the last 2 years</b>      |                        |
| No                                                  | 186 (53.8)             |
| Yes                                                 | 160 (46.2)             |
| <b>Estimated amount</b>                             |                        |
| <10,000 Naira                                       | 73 (45.6)              |
| 10,000-49,000 Naira                                 | 38 (23.8)              |
| 50,000-99,999 Naira                                 | 16 (10.0)              |
| >100,000 Naira                                      | 22 (13.8)              |
| Unknown                                             | 11 (6.9)               |
| <b>Reasons for major medical costs (n=158)</b>      |                        |
| Surgery                                             | 17 (10.8)              |
| Chronic conditions                                  | 52 (32.9)              |
| Acute illness/trauma                                | 74 (46.8)              |
| Other/multiple reasons                              | 15 (9.5)               |
| <b>Amount spent (continuous)</b>                    |                        |
| Overall median (range)                              | 10,000 (50-1,500,000)  |
| <b>Median amount spent by reason (range)</b>        |                        |
| Surgery                                             | 60,000 (7,000-150,000) |
| Chronic conditions                                  | 18,000 (500-150,000)   |

|                        |                      |
|------------------------|----------------------|
| Acute illness/trauma   | 5,000 (50-400,000)   |
| Other/multiple reasons | 70,000 (800-500,000) |

Within eligible populations, we performed analysis to look for the association between cancer screening activity and income, insurance status and education **Table 5**. Individuals with lower levels of income were less likely to have had cancer screening assessments. Cancer screening activity was more frequent in those with higher levels of education. No significant relationship was observed by insurance status or other factors that were assessed. In a multivariable logistic regression model including personal income, insurance status and education, the only statistically significant odds ratio for association with cancer screening activity was observed for personal income (personal income OR 2.7 95%CI 1.3-5.7  $p < 0.01$ , education level OR 1.7 95%CI 0.98-2.7  $p = 0.06$ , insurance status OR 4.3 95%CI 0.8-23.1  $p = 0.09$ ).

**Table 5: Association between Cancer Screening Activity and Income, Insurance and Education N =310\***

| Variable                                     | Cancer Screening (N=17) | No Cancer Screening (N=293) | P value* |
|----------------------------------------------|-------------------------|-----------------------------|----------|
| <b>Personal income (per month, in Naira)</b> |                         |                             |          |
| <10,000                                      | 2/138 (1.5)             | 140/138 (98.5)              | <0.01    |
| 10,000-49,999                                | 9/122 (7.4)             | 115/122 (92.6)              |          |
| >50,000                                      | 6/43 (14.0)             | 38/43 (86.0)                |          |
| <b>Family income (per month, in Naira)</b>   |                         |                             |          |
| <10,000                                      | 1/108 (0.9)             | 107/108 (99.1)              | <0.01    |
| 10,000-49,999                                | 8/129 (6.2)             | 121/129 (93.8)              |          |
| >50,000                                      | 8/66 (12.1)             | 58/66 (87.9)                |          |
| <b>Insurance Status</b>                      |                         |                             |          |
| No                                           | 15/290 (5.2)            | 275/290 (94.8)              | 0.12     |
| Yes                                          | 2/13 (15.4)             | 11/13 (84.6)                |          |
| <b>Education</b>                             |                         |                             |          |
| No formal education                          | 1/86 (1.2)              | 85/86 (98.8)                | 0.04     |
| Primary                                      | 3/83 (3.6)              | 80/83 (96.4)                |          |
| Secondary                                    | 8/78 (10.3)             | 70/78 (89.7)                |          |



1  
2  
3  
4  
5  
6  
7  
8  
9  
10  
11  
12  
13  
14  
15  
16  
17  
18  
19  
20  
21  
22  
23  
24  
25  
26  
27  
28  
29  
30  
31  
32  
33  
34  
35  
36  
37  
38  
39  
40  
41  
42  
43  
44  
45  
46  
47  
48  
49  
50  
51  
52  
53  
54  
55  
56  
57  
58  
59  
60

|        |            |              |
|--------|------------|--------------|
| Higher | 5/56 (8.9) | 51/56 (91.1) |
|--------|------------|--------------|

No association by Gender, Marital Status, Religion

+ Adjusted for eligible population, whereby cancer screening activities defined as history of cervical assessment in women >21 years, mammogram in women >40 years, and colonoscopy in all individuals >50 years

\* Fisher's exact test for association

For peer review only

## DISCUSSION

We performed a cross-sectional community-based study in Osun state, Nigeria to provide a snapshot of the challenges faced in the management of NCDs in the region.

This study was conducted with an emphasis on cancer within broader research aims of identifying risk factors (lifestyle, diet, biological) associated with the rising cancer incidence in the region. We observed that screening assessment for breast, cervical, and colon cancer (the major contributors to cancer morbidity in the region),<sup>6 19 33</sup> were extremely low. This observation was despite a median age of 52 years and a high representation of females. In addition, <5% of the surveyed population possessed universal health care in the form of health insurance. We also found low incomes, high fertility rates, and evidence of poorly controlled chronic diseases, such as hypertension, in our cohort. The rates are comparable to national averages (suggesting our sample sits between the urban/rural divide)<sup>31</sup> and likely represent broad health and development deficiencies present in the community. For example, the high prevalence of hypertension in this population is remarkably similar to that reported in a systematic review and meta-analysis conducted in the region.<sup>34 35</sup> The high burden of hypertension in the region has also been recently acknowledged by the World Health Organization in its efforts to control hypertension in Nigeria.<sup>36</sup>

Previous studies conducted in the region<sup>37-45</sup> have demonstrated that poor access to cancer services is associated with late presentation and high incidence/mortality ratio.<sup>5 46</sup> This highlights a need to develop sound healthcare infrastructure, whereby individuals can be screened for asymptomatic disease and also adequately access services in a timely fashion when symptomatic. Our study identifies that screening activities may be lacking through either delivery and/or uptake, and that the potential

1  
2  
3 cost implications of accessing treatment when symptoms arise, in the absence of  
4 adequate health insurance, can be high. The experience from other sub-Saharan  
5 African nations suggests that individuals seeking cancer services face significant  
6 barriers to access.<sup>38 39 47-50</sup> The Nigerian “National Cancer Control Plan 2018-2022,”  
7 specifically details goals to make screening services and early detection of cancer  
8 available for all Nigerians, and to improve access to quality, cost-effective, and  
9 equitable diagnostic and treatment services for cancer care. This is centered around  
10 investment in eight public comprehensive cancer centers covering all geo-political  
11 zones, as well as the implementation of various screening strategies throughout  
12 different sectors of the healthsystem.<sup>20</sup> Our results suggest that considerable work is  
13 required to reach the goal of “greater than 50% screening of ‘eligible populations’ by  
14 2022.”<sup>20</sup> We assessed cancer screening using measures that are recommended in  
15 this national plan. The methods we assessed are accessed at different levels of the  
16 healthcare system – cervical cancer assessment predominantly at a primary health  
17 care level, breast cancer at secondary/tertiary level through mammography, and  
18 colon cancer at tertiary level through colonoscopy. Whilst our analysis provides some  
19 idea of how individuals may have navigated the health system further detailed study  
20 is required to look at specific engagement at these different levels to inform  
21 appropriate resource allocation.  
22  
23  
24  
25  
26  
27  
28  
29  
30  
31  
32  
33  
34  
35  
36  
37  
38  
39  
40  
41  
42  
43  
44  
45  
46  
47  
48

49 It is important to acknowledge that cancer screening in low and middle income  
50 countries requires measures tailored to local capacity and disease prevalence. For  
51 breast cancer, although mammography remains the gold standard for early detection  
52 of breast cancer, the Breast Health Global Initiative (BHGI) resource-stratified  
53 guidelines recommend clinical breast examination as a practical and necessary  
54  
55  
56  
57  
58  
59  
60

1  
2  
3 alternative for early detection in low-resource settings.<sup>19 48 51</sup> This has been  
4 recommended in local policy and was not assessed in the current study.<sup>20</sup> Despite  
5 this, with over 50 percent of individuals in this study visiting a primary health care  
6 doctor in the last year, our findings strongly support the need to concentrate cancer  
7 screening efforts at primary healthcare where possible through the use of similar  
8 interventions. Colon cancer screening by colonoscopy for those over the age of fifty  
9 as recommended in high income countries does not exist in sufficient capacity for this  
10 to be recommended in an LMIC setting.<sup>52</sup> Efforts to intervene at primary healthcare  
11 level through the use of stool testing and symptom stratification are ongoing.<sup>53 54</sup>  
12 Overall, education, training and adequately resourcing community healthcare workers  
13 and physicians at primary healthcare level for cancer screening assessment is  
14 essential.

15  
16  
17 We demonstrated that both income and medical expenditure relative to this level of  
18 income, compounded by the lack of universal health care coverage, must be factored  
19 into strategies laid out to address cancer control. The costs of the screening  
20 interventions assessed in this study relative to income, are prohibitive for the majority  
21 of individuals without government subsidy; approx. \$50 US ~ \$18000 Naira (for  
22 mammography), \$15 US ~ \$3000 Naira (cervical smear). This is compounded by the  
23 finding of only 4% of our cohort having health insurance coverage. In addition, major  
24 medical costs were incurred by over half of those interviewed, and a significant  
25 proportion of these costs were for chronic diseases (33%). Those individuals with the  
26 lowest income were more likely to report visits to the doctor, chronic disease, and  
27 significant “out of pocket” medical expenditures. The Nigerian national health  
28 insurance scheme (NHIS) has been in place since 2005. When it was introduced, state  
29  
30  
31  
32  
33  
34  
35  
36  
37  
38  
39  
40  
41  
42  
43  
44  
45  
46  
47  
48  
49  
50  
51  
52  
53  
54  
55  
56  
57  
58  
59  
60

1  
2  
3 governments were instructed to adopt the program for their employees in the formal  
4 sector. After insuring government employees, state governments were instructed to  
5 expand coverage across all individuals with the goal of universal health coverage.<sup>14 15</sup>  
6  
7 Recent reports confirm that this expansion has been limited in Nigeria. In line with  
8 previous studies, our data indicate that the NHIS is severely underutilized in the  
9 community population.<sup>15 16</sup> The state health insurance scheme has been instituted in  
10 only 2 out of 36 states of the federation at community level and this has not been the  
11 case in Osun state where the study took place.<sup>15</sup>  
12  
13  
14  
15  
16  
17  
18  
19  
20  
21  
22  
23

24 We found wide range of “major” medical expenditure in our study group, with a median  
25 expenditure exceeding the monthly salary of ~45% of the group. It is important to note  
26 that we did not obtain information on total household expenditures to allow a relative  
27 assessment of the amount spent on medical costs, and, in turn, determine  
28 “catastrophic” costs.<sup>16</sup> However, based on income and demographic comparisons with  
29 other groups studied in the region, it is likely that catastrophic spending is high.<sup>55</sup>  
30 Further research into how the money to cover medical expenditure is generated (i.e.,  
31 personal savings, family savings, loans, etc.) is required. Taken together with prior  
32 work in the region<sup>56 57</sup>, it is evident that risk pooling and financial risk protection are  
33 required for the provision of preventative and therapeutic NCD health services.  
34  
35  
36  
37  
38  
39  
40  
41  
42  
43  
44  
45  
46  
47  
48

49 Whilst we did not directly assess awareness of cancer screening, we did demonstrate  
50 an association between cancer screening activity and education level. Levels of  
51 education have been associated with awareness and accessing cancer services in  
52 previous studies.<sup>38 45 47 58</sup> In addition to this, we also found that ~75% of participants  
53 had access to radio and/or television within family and social networks, suggesting  
54  
55  
56  
57  
58  
59  
60

1  
2  
3 that mass communication channels to promote health awareness exist. In fact, these  
4 facilitated the current study when combined with strategies using mobile phone  
5 technologies. More broadly, these channels represent promising avenues to promote  
6 health and prevention of disease in the region.<sup>59</sup> In addition, “demand-side”  
7 approaches to resource allocation, such as the stipend we provided for travel in the  
8 study or e-vouchers,<sup>60 61</sup> are likely to be well received by the community and may  
9 promote uptake of health-screening activities.  
10  
11  
12  
13  
14  
15  
16  
17  
18  
19  
20

21 A strength of this study is that it was performed within the community and involved  
22 trained research staff fluent in the local dialect and used a validated questionnaire.  
23 The study was performed in conjunction with local community healthcare workers and  
24 the tertiary referral hospital, which was intended to help residents develop an  
25 awareness of how and where healthcare can be accessed in the area and to establish  
26 a sustained relationship with this community. Limitations of this work include the  
27 potential for misclassification and recall bias, as we relied on individuals to  
28 retrospectively describe their own health and socioeconomic status as well as their  
29 interactions with healthcare services. Whilst we have documented low levels of  
30 screening activities and associations with income and education, we did not directly  
31 require individuals to state specifically their personal reasons for not being screened;  
32 we were therefore unable to delineate specific barriers to cancer screening, such as  
33 emotional barriers (e.g., concern about cancer diagnosis, limited awareness) and  
34 barriers to access (e.g., screening locations, availability of transportation, limited  
35 finances, etc.). Detailed qualitative analysis of these barriers would be worthwhile and  
36 is the subject of our future work in the region. In addition, while the study sample was  
37 chosen at random and consecutive individuals were enrolled, the survey was  
38  
39  
40  
41  
42  
43  
44  
45  
46  
47  
48  
49  
50  
51  
52  
53  
54  
55  
56  
57  
58  
59  
60

1  
2  
3 conducted at a single time that was mid-week, during the day; this timing may have  
4  
5 affected our sample composition. For instance, 75% of participants in our study were  
6  
7 female, which may potentially limit the generalizability of our findings. However, it is  
8  
9 reassuring we observed overall consistency with national demographic indicators  
10  
11 (e.g., income, education, and living conditions), which indicates that our sample is  
12  
13 likely reflective of rural community-dwelling individuals in the wider region.<sup>31 32</sup>  
14  
15  
16  
17  
18

19 In summary, our results highlight infrequent cancer screening activities in a Nigerian  
20  
21 community population and identifies areas that can be targeted to address this,  
22  
23 including the use of measures focused at primary healthcare level, financial risk  
24  
25 protection, awareness, and strategic resource allocation.  
26  
27  
28  
29  
30  
31  
32  
33  
34  
35  
36  
37  
38  
39  
40  
41  
42  
43  
44  
45  
46  
47  
48  
49  
50  
51  
52  
53  
54  
55  
56  
57  
58  
59  
60

## Ethical Approval Statement

The study was approved by the Obafemi Awolowo University institutional ethics review committee.

### Author contributions:

1. **Avinash Sharma**

Author contributions: Initial conception, study and questionnaire design, data collection, data analysis, manuscript writing

2. **O.I. Alatise**

Author contribution: Initial conception, study and questionnaire design, manuscript revision

3. **K. O'Connell**

Author contributions: Data and statistical analysis, questionnaire design, manuscript revision

4. **S.G Ogunleye**

Author contributions: study organisation, data collection, manuscript revision

5. **A.A. Aderounmu**

Author contributions: study organisation, data collection, manuscript revision

6. **M.L.Samson**

Author contributions: study and questionnaire design, manuscript revision

7. **F. Wuraola**

Author contributions: study design, questionnaire design, manuscript revision

8. **O. Olasehinde**

Author contributions: study design, data collection, manuscript revision



1  
2  
3 9. **T.P. Kingham**  
4

5 Author contributions: Initial conception, study design, overall supervision, manuscript revision  
6  
7

8 10. **M. Du**  
9

10 Author contributions: Initial conception, study and questionnaire design, overall supervision,  
11 manuscript revision  
12  
13  
14  
15

16 **Competing Interests:** None to declare  
17  
18  
19

20 **Funding:** This research was conducted with the support of the African Research  
21 Group for Oncology (ARGO) consortium. The consortium was initiated using a pilot  
22 grant funding from the National Cancer Institute's (NCI) Center for Global Health to  
23 perform dedicated cancer research in the region. This research was supported by the  
24 National Cancer Institute grant numbers R01 CA246620 and P30 CA008748.  
25  
26  
27  
28  
29  
30  
31  
32  
33

34 **Data sharing:** No additional data available  
35  
36  
37  
38  
39  
40  
41  
42  
43  
44  
45  
46  
47  
48  
49  
50  
51  
52  
53  
54  
55  
56  
57  
58  
59  
60

## REFERENCES

1. Niessen LW, Mohan D, Akuoku JK, et al. Tackling socioeconomic inequalities and non-communicable diseases in low-income and middle-income countries under the Sustainable Development agenda. *Lancet* 2018;391(10134):2036-46. doi: 10.1016/s0140-6736(18)30482-3 [published Online First: 2018/04/09]
2. Ezzati M, Pearson-Stuttard J, Bennett JE, et al. Acting on non-communicable diseases in low- and middle-income tropical countries. *Nature* 2018;559(7715):507-16. doi: 10.1038/s41586-018-0306-9 [published Online First: 2018/07/27]
3. NCD Countdown 2030: worldwide trends in non-communicable disease mortality and progress towards Sustainable Development Goal target 3.4. *Lancet* 2018;392(10152):1072-88. doi: 10.1016/s0140-6736(18)31992-5 [published Online First: 2018/09/29]
4. GLOBOCAN 2018: counting the toll of cancer. *Lancet* 2018;392(10152):985. doi: 10.1016/s0140-6736(18)32252-9 [published Online First: 2018/09/29]
5. Bray F, Ferlay J, Soerjomataram I, et al. Global cancer statistics 2018: GLOBOCAN estimates of incidence and mortality worldwide for 36 cancers in 185 countries. *CA: A Cancer Journal for Clinicians* 2018;68(6):394-424. doi: 10.3322/caac.21492
6. Olaleye O, Ekrikpo U. Epidemiology of Cancers in Sub-Saharan Africa. In: Adedeji OA, ed. *Cancer in Sub-Saharan Africa: Current Practice and Future*. Cham: Springer International Publishing 2017:3-19.
7. Mostert S, Njuguna F, Olbara G, et al. Corruption in health-care systems and its effect on cancer care in Africa. *Lancet Oncol* 2015;16(8):e394-404. doi: 10.1016/s1470-2045(15)00163-1 [published Online First: 2015/08/08]
8. Harford JB. Barriers to overcome for effective cancer control in Africa. *Lancet Oncol* 2015;16(8):e385-93. doi: 10.1016/s1470-2045(15)00160-6 [published Online First: 2015/08/08]
9. Transforming our world : the 2030 Agenda for Sustainable Development: UN General Assembly; 21 October 2015 [Available from: <https://www.undp.org/content/undp/en/home/sustainable-development-goals.html> accessed 23 August 2019.
10. Douthit NT, Alemu HK. Social determinants of health: poverty, national infrastructure and investment. *BMJ Case Reports* 2016;2016:bcr2016215670. doi: 10.1136/bcr-2016-215670
11. Attia-Konan AR, Oga ASS, Touré A, et al. Distribution of out of pocket health expenditures in a sub-Saharan Africa country: evidence from the national survey of household standard of living, Côte d'Ivoire. *BMC Res Notes* 2019;12(1):25. doi: 10.1186/s13104-019-4048-z [published Online First: 2019/01/17]
12. Leive A, Xu K. Coping with out-of-pocket health payments: empirical evidence from 15 African countries. *Bull World Health Organ* 2008;86(11):849-56. doi: 10.2471/blt.07.049403 [published Online First: 2008/11/26]
13. Xu K, Evans DB, Kawabata K, et al. Household catastrophic health expenditure: a multicountry analysis. *Lancet* 2003;362(9378):111-7. doi: 10.1016/s0140-6736(03)13861-5 [published Online First: 2003/07/18]

14. Onoka CA, Onwujekwe OE, Uzochukwu BS, et al. Promoting universal financial protection: constraints and enabling factors in scaling-up coverage with social health insurance in Nigeria. *Health Res Policy Syst* 2013;11:20. doi: 10.1186/1478-4505-11-20 [published Online First: 2013/06/15]
15. Uzochukwu BS, Ughasoro MD, Etiaba E, et al. Health care financing in Nigeria: Implications for achieving universal health coverage. *Niger J Clin Pract* 2015;18(4):437-44. doi: 10.4103/1119-3077.154196 [published Online First: 2015/05/15]
16. Aregbeshola BS, Khan SM. Out-of-Pocket Payments, Catastrophic Health Expenditure and Poverty Among Households in Nigeria 2010. *Int J Health Policy Manag* 2018;7(9):798-806. doi: 10.15171/ijhpm.2018.19 [published Online First: 2018/10/15]
17. Jedy-Agba E, Curado MP, Ogunbiyi O, et al. Cancer incidence in Nigeria: a report from population-based cancer registries. *Cancer Epidemiol* 2012;36(5):e271-8. doi: 10.1016/j.canep.2012.04.007 [published Online First: 2012/05/25]
18. Awodele O, Adeyomoye AA, Awodele DF, et al. Cancer distribution pattern in south-western Nigeria. *Tanzan J Health Res* 2011;13(2):125-31. doi: 10.4314/thrb.v13i2.55226 [published Online First: 2011/04/01]
19. Ishola F, Omole O. A vision for improved cancer screening in Nigeria. *Lancet Glob Health* 2016;4(6):e359-60. doi: 10.1016/s2214-109x(16)30062-6 [published Online First: 2016/05/21]
20. Nigeria National Cancer Control Plan 2018 – 2022. Abuja: Federal Ministry of Health, Nigeria 2018.
21. World Bank staff estimates based on the United Nations Population Division's World Urbanization Prospects: 2018 Revision: The World Bank Group; [Available from: <https://data.worldbank.org/indicator/SP.RUR.TOTL.ZS> accessed November 2019.
22. Kingham TP, Alatise OI. Establishing Translational and Clinical Cancer Research Collaborations Between High- and Low-Income Countries. *Annals of Surgical Oncology* 2015;22(3):741-46. doi: 10.1245/s10434-014-4342-x
23. Irabor DO. Emergence of Colorectal Cancer in West Africa: Accepting the Inevitable. *Niger Med J* 2017;58(3):87-91. doi: 10.4103/0300-1652.234076 [published Online First: 2017/05/01]
24. National Population Commission (NPC) [Nigeria] and ICF International. 2014. Nigeria Demographic and Health Survey 2013. Abuja, Nigeria, and Rockville, Maryland, USA: NPC and ICF International. <https://dhsprogram.com/pubs/pdf/fr293/fr293.pdf> (Accessed February 14, 2018).
25. National Bureau of Statistics (NBS) - Federal Government of Nigeria. Nigeria - General Household Survey, Panel 2015-2016, Wave 3. <http://microdata.worldbank.org/index.php/catalog/2734/study-description> (Accessed February 15, 2018).
26. Cleland CL, Hunter RF, Kee F, et al. Validity of the global physical activity questionnaire (GPAQ) in assessing levels and change in moderate-vigorous physical activity and sedentary behaviour. *BMC Public Health* 2014;14:1255. doi: 10.1186/1471-2458-14-1255 [published Online First: 2014/12/11]
27. Colditz GA, Manson JE, Hankinson SE. The Nurses' Health Study: 20-year contribution to the understanding of health among women. *J Womens Health* 1997;6(1):49-62.
28. Hu FB, Satija A, Rimm EB, et al. Diet Assessment Methods in the Nurses' Health Studies and Contribution to Evidence-Based Nutritional Policies and Guidelines. *American*

- 1  
2  
3 *journal of public health* 2016;106(9):1567-72. doi: 10.2105/AJPH.2016.303348  
4 [published Online First: 2016/07/28]  
5  
6 29. Willett WC, Sampson L, Stampfer MJ, et al. Reproducibility and Validity of a  
7 Semiquantitative Food Frequency Questionnaire. *American Journal of Epidemiology*  
8 1985;122(1):51-65. doi: 10.1093/oxfordjournals.aje.a114086  
9  
10 30. Wolf AM, Hunter DJ, Colditz GA, et al. Reproducibility and Validity of a Self-Administered  
11 Physical Activity Questionnaire. *International Journal of Epidemiology* 1994;23(5):991-  
12 99. doi: 10.1093/ije/23.5.991  
13  
14 31. Nigeria Demographic and Health Survey. Abuja, Nigeria: National Population Commission,  
15 Federal Republic of Nigeria, June 2014.  
16  
17 32. "Nigeria Country Briefing", Multidimensional Poverty Index Data Bank: Oxford Poverty  
18 and Human Development Initiative, University of Oxford.; 2017 [Available from:  
19 [www.ophi.org.uk/multidimensional-poverty-index/mpo-country-briefings/](http://www.ophi.org.uk/multidimensional-poverty-index/mpo-country-briefings/). accessed  
20 August 2019 2019.  
21  
22 33. Morhason-Bello IO, Odedina F, Rebbeck TR, et al. Challenges and opportunities in cancer  
23 control in Africa: a perspective from the African Organisation for Research and  
24 Training in Cancer. *Lancet Oncol* 2013;14(4):e142-51. doi: 10.1016/s1470-  
25 2045(12)70482-5 [published Online First: 2013/04/09]  
26  
27 34. Adeloye D, Basquill C, Aderemi AV, et al. An estimate of the prevalence of hypertension  
28 in Nigeria: a systematic review and meta-analysis. *J Hypertens* 2015;33(2):230-42. doi:  
29 10.1097/hjh.0000000000000413 [published Online First: 2014/11/08]  
30  
31 35. Idris IO, Oguntade AS, Mensah EA, et al. Prevalence of non-communicable diseases and  
32 its risk factors among Ijegan-Isheri Osun residents in Lagos State, Nigeria: a  
33 community based cross-sectional study. *BMC Public Health* 2020;20(1):1258. doi:  
34 10.1186/s12889-020-09349-2  
35  
36 36. Nigeria collaborates with WHO to curb hypertension, introduces control initiative  
37 Abeokuta, Nigeria: World Health Organisation; December 2020 [Available from:  
38 [https://www.afro.who.int/news/nigeria-collaborates-who-curb-hypertension-](https://www.afro.who.int/news/nigeria-collaborates-who-curb-hypertension-introduces-control-initiative#:~:text=The%20review%20estimated%20that%20prevalence,29.5%25%2C%20women%2031.1%25).)  
39 [introduces-control-](https://www.afro.who.int/news/nigeria-collaborates-who-curb-hypertension-introduces-control-initiative#:~:text=The%20review%20estimated%20that%20prevalence,29.5%25%2C%20women%2031.1%25).)  
40 [initiative#:~:text=The%20review%20estimated%20that%20prevalence,29.5%25%2C%20women%2031.1%25](https://www.afro.who.int/news/nigeria-collaborates-who-curb-hypertension-introduces-control-initiative#:~:text=The%20review%20estimated%20that%20prevalence,29.5%25%2C%20women%2031.1%25).)). accessed 15 April 2021 2021.  
41  
42 37. Olasehinde O, Alatishe OI, Arowolo OA, et al. Barriers to mammography screening in  
43 Nigeria: A survey of two communities with different access to screening facilities. *Eur*  
44 *J Cancer Care (Engl)* 2019;28(2):e12986. doi: 10.1111/ecc.12986 [published Online  
45 First: 2019/01/08]  
46  
47 38. McKenzie F, Zietsman A, Galukande M, et al. Breast cancer awareness in the sub-Saharan  
48 African ABC-DO cohort: African Breast Cancer—Disparities in Outcomes study. *Cancer*  
49 *Causes & Control* 2018;29(8):721-30. doi: 10.1007/s10552-018-1047-7  
50  
51 39. Makau-Barasa LK, Greene SB, Othieno-Abinya NA, et al. Improving Access to Cancer  
52 Testing and Treatment in Kenya. *Journal of Global Oncology* 2018(4):1-8. doi:  
53 10.1200/jgo.2017.010124  
54  
55 40. Ugwumba FO, Ekwueme OE, Okoh AD. Testicular Cancer and Testicular Self-Examination;  
56 Knowledge, Attitudes and Practice in Final Year Medical Students in Nigeria. *Asian Pac*  
57 *J Cancer Prev* 2016;17(11):4999-5003. doi: 10.22034/apjcp.2016.17.11.4999  
58 [published Online First: 2016/12/30]  
59  
60 41. Mbamara SU, Ikpeze OC, Okonkwo JE, et al. Knowledge, attitude and practice of cervical  
cancer screening among women attending gynecology clinics in a tertiary level

- 1  
2  
3 medical care center in southeastern Nigeria. *J Reprod Med* 2011;56(11-12):491-6.  
4 [published Online First: 2011/12/27]  
5  
6 42. Wright KO, Kuyinu YA, Faduyile FA. Community education on cervical cancer amongst  
7 market women in an urban area of Lagos, Nigeria. *Asian Pac J Cancer Prev*  
8 2010;11(1):137-40. [published Online First: 2010/07/03]  
9  
10 43. Aniebue PN, Aniebue UU. Awareness and practice of cervical cancer screening among  
11 female undergraduate students in a Nigerian university. *J Cancer Educ* 2010;25(1):106-  
12 8. doi: 10.1007/s13187-009-0023-z [published Online First: 2010/01/19]  
13  
14 44. Ajape AA, Babata A, Abiola OO. Knowledge of prostate cancer screening among native  
15 African urban population in Nigeria. *Nig Q J Hosp Med* 2010;20(2):94-6. [published  
16 Online First: 2011/01/20]  
17  
18 45. Obiechina NJ, Mbamara SU. Knowledge attitude and practice of cervical cancer screening  
19 among sexually active women in Onitsha, southeast Nigeria. *Niger J Med*  
20 2009;18(4):384-7. [published Online First: 2010/02/03]  
21  
22 46. Kontis V, Mathers CD, Bonita R, et al. Regional contributions of six preventable risk factors  
23 to achieving the 25 x 25 non-communicable disease mortality reduction target: a  
24 modelling study. *Lancet Glob Health* 2015;3(12):e746-57. doi: 10.1016/s2214-  
25 109x(15)00179-5 [published Online First: 2015/10/27]  
26  
27 47. Tiruneh FN, Chuang KY, Ntenda PAM, et al. Individual-level and community-level  
28 determinants of cervical cancer screening among Kenyan women: a multilevel analysis  
29 of a Nationwide survey. *BMC Womens Health* 2017;17(1):109. doi: 10.1186/s12905-  
30 017-0469-9 [published Online First: 2017/11/17]  
31  
32 48. Masalu N, Serra P, Amadori D, et al. Setting up a community-based cervical screening  
33 service in a low-income country: a pilot study from north-western Tanzania.  
34 *International Journal of Public Health* 2017;62(7):755-62. doi: 10.1007/s00038-017-  
35 0971-8  
36  
37 49. Kangmennaang J, Mkandawire P, Luginaah I. Breast cancer screening among women in  
38 Namibia: explaining the effect of health insurance coverage and access to information  
39 on screening behaviours. *Glob Health Promot* 2017;1757975917727017. doi:  
40 10.1177/1757975917727017 [published Online First: 2017/09/26]  
41  
42 50. Stulac S, Binagwaho A, Tapela NM, et al. Capacity building for oncology programmes in  
43 sub-Saharan Africa: the Rwanda experience. *Lancet Oncol* 2015;16(8):e405-13. doi:  
44 10.1016/s1470-2045(15)00161-8 [published Online First: 2015/08/08]  
45  
46 51. Anderson BO, Yip CH, Smith RA, et al. Guideline implementation for breast healthcare in  
47 low-income and middle-income countries: overview of the Breast Health Global  
48 Initiative Global Summit 2007. *Cancer* 2008;113(8 Suppl):2221-43. doi:  
49 10.1002/cncr.23844 [published Online First: 2008/09/26]  
50  
51 52. Knapp GC, Alatise OI, Olasehinde OO, et al. Is Colorectal Cancer Screening Appropriate in  
52 Nigeria? *J Glob Oncol* 2019;5:1-10. doi: 10.1200/jgo.19.00035 [published Online First:  
53 2019/06/07]  
54  
55 53. Alatise OI, Ayandipo OO, Adeyeye A, et al. A symptom-based model to predict colorectal  
56 cancer in low-resource countries: Results from a prospective study of patients at high  
57 risk for colorectal cancer. *Cancer* 2018;124(13):2766-73. doi: 10.1002/cncr.31399  
58 [published Online First: 2018/04/13]  
59  
60 54. Knapp GC, Sharma A, Olopade B, et al. An Exploratory Analysis of Fecal Immunochemical  
Test Performance for Colorectal Cancer Screening in Nigeria. *World J Surg*

- 2019;43(11):2674-80. doi: 10.1007/s00268-019-05100-0 [published Online First: 2019/08/14]
55. Olugbenga-Bello A, Adebimpe W. Knowledge and attitude of civil servants in Osun state, Southwestern Nigeria towards the national health insurance. *Nigerian Journal of Clinical Practice* 2010;13(4):421-26.
56. Dieleman JL, Sadat N, Chang AY, et al. Trends in future health financing and coverage: future health spending and universal health coverage in 188 countries, 2016–40. *The Lancet* 2018;391(10132):1783-98. doi: [https://doi.org/10.1016/S0140-6736\(18\)30697-4](https://doi.org/10.1016/S0140-6736(18)30697-4)
57. Dieleman J, Campbell M, Chapin A, et al. Evolution and patterns of global health financing 1995–2014: development assistance for health, and government, prepaid private, and out-of-pocket health spending in 184 countries. *The Lancet* 2017;389(10083):1981-2004. doi: [https://doi.org/10.1016/S0140-6736\(17\)30874-7](https://doi.org/10.1016/S0140-6736(17)30874-7)
58. Alatise OI, Fischer SE, Ayandipo OO, et al. Health-Seeking Behavior and Barriers to Care in Patients With Rectal Bleeding in Nigeria. *Journal of global oncology* 2017;3(6):749-56. doi: 10.1200/JGO.2016.006601 [published Online First: 2017/02/01]
59. Yang Q, Van Stee SK. The Comparative Effectiveness of Mobile Phone Interventions in Improving Health Outcomes: Meta-Analytic Review. *JMIR Mhealth Uhealth* 2019;7(4):e11244. doi: 10.2196/11244 [published Online First: 2019/04/04]
60. Erwin E, Aronson KJ, Day A, et al. SMS behaviour change communication and eVoucher interventions to increase uptake of cervical cancer screening in the Kilimanjaro and Arusha regions of Tanzania: a randomised, double-blind, controlled trial of effectiveness. *BMJ Innovations* 2019:bmjinnov-2018-000276. doi: 10.1136/bmjinnov-2018-000276
61. Hurst TE, Semrau K, Patna M, et al. Demand-side interventions for maternal care: evidence of more use, not better outcomes. *BMC Pregnancy Childbirth* 2015;15:297. doi: 10.1186/s12884-015-0727-5 [published Online First: 2015/11/17]

Participant ID: \_\_\_\_\_ COLORECTAL CASE / BREAST CASE / CONTROL (CIRCLE ONE)  
 Recruitment site: \_\_\_\_\_ MALE / FEMALE (CIRCLE ONE)  
 Interviewer ID: \_\_\_\_\_ Date questionnaire administered: \_\_\_\_\_  
 Phone Number \_\_\_\_\_ Hospital Number \_\_\_\_\_  
 Patient Surname: \_\_\_\_\_ Patient First Name: \_\_\_\_\_

ALL INFORMATION IS STRICTLY CONFIDENTIAL AND IS TO BE USED FOR RESEARCH PURPOSES ONLY.

PLEASE NOTE IN COVER SHEET REASON FOR NON-RESPONSE TO ANY QUESTIONS.

PLEASE ENTER ALL WRITTEN TEXT USING ONLY CAPITAL LETTERS.

PLEASE ENTER ALL NUMBERS AS VALUES ONLY WITH NO SYMBOLS OR PUNCTUATION.

### Demographic History

1. What is your date of birth (DAY/MONTH/YEAR)? \_\_\_\_ / \_\_\_\_ / \_\_\_\_
2. (FOR CASES ONLY) When did you last feel well (i.e., mostly unaffected by pain/discomfort)? \_\_\_\_ (months ago)
3. (FOR CASES ADD: When you were well) what is/was your weight? (Measure to nearest kg) \_\_\_\_ (kg)
4. Has your weight changed (+/- 5 kg) in the past 2 years?  No  Increased 5 kg  Decreased 5 kg

5. Which diagram best depicts your outline at each age?

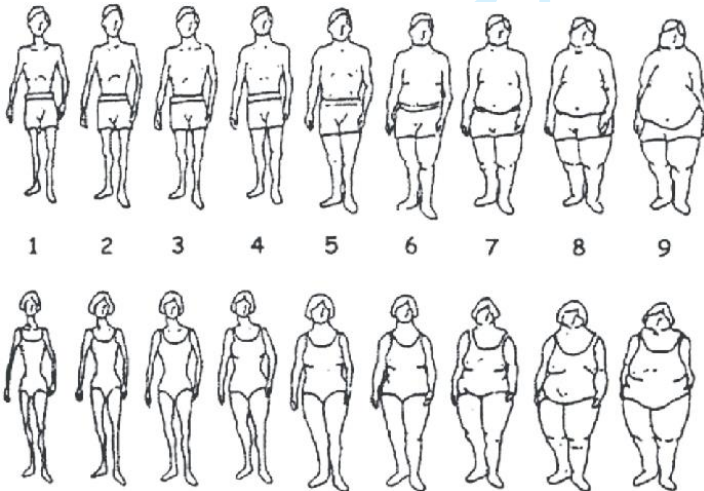

|                              | Indicate diagram (1 to 9) |
|------------------------------|---------------------------|
| Age 10 years                 |                           |
| Age 20 years                 |                           |
| Age 30 years (if applicable) |                           |
| Age 40 years (if applicable) |                           |
| Age 50 years (if applicable) |                           |
| Current                      |                           |

6. What is your height? (Measure to nearest cm) \_\_\_\_ (cm)
7. What is your current marital status?  Single  Widowed  Married  Divorced
8. Has anyone in your immediate family (e.g., parents, siblings, children) completed secondary school or above?  Yes  No
9. What is the highest educational level you have completed?

No formal education  Primary  Secondary  Vocational/technical  University  Graduate school

10. What is/was your occupation at the following 2 time periods?

|                       | Unemployed | Pensioner | Civil Servant | Trader | Farmer | Driver | Self Employed | Retired | Student | Other _____ |
|-----------------------|------------|-----------|---------------|--------|--------|--------|---------------|---------|---------|-------------|
| Current               |            |           |               |        |        |        |               |         |         |             |
| Less than 2 years ago |            |           |               |        |        |        |               |         |         |             |
| More than 2 years ago |            |           |               |        |        |        |               |         |         |             |

11. What is your current religion?  Christian  Muslim  Traditional  Other \_\_\_\_\_ (specify)

12. What is your current address? Latitude \_\_\_\_\_ Longitude \_\_\_\_\_ House Number \_\_\_\_\_ Street/Suburb Name \_\_\_\_\_  
Town \_\_\_\_\_

LGA/District \_\_\_\_\_ Landmark \_\_\_\_\_ Village Name \_\_\_\_\_

13. What tribe do you belong to?  Yoruba  Ibo  Hausa  Other \_\_\_\_\_ (specify)

14. Including yourself, how many people live in your household? \_\_\_\_\_

15. Including you, what was your household's AVERAGE MONTHLY combined income (including all sources) over the last year?

\_\_\_\_\_ (Naira)  Refused/Don't Know

↓ If refused/don't know

15a. Was your household's AVERAGE MONTHLY combined income last year less than 21000 Naira?  Yes  No

15b. Was your household's AVERAGE MONTHLY combined income last year less than 34000 Naira?  Yes  No

16. What was your personal AVERAGE MONTHLY income (including all sources) over the last year?

\_\_\_\_\_ (Naira)  Refused/Don't Know

↓ If refused/don't know

16a. Was your personal AVERAGE MONTHLY income last year less than 21000 Naira?  Yes  No

16b. Was your personal AVERAGE MONTHLY income last year less than 34000 Naira?  Yes  No

17. What type of toilet do you have at home?  Water system (flushable)  Pit latrine with vent pipe  Unventilated pit latrine

Bush  Bucket  Composting toilet  Other \_\_\_\_\_

18. Is your toilet shared with another household?  Yes  No

19. What is the source of your water supply?  Pipe borne  Public tap  Borehole or pump  Dug well

River/spring  Rain harvested water  Other \_\_\_\_\_

20. Is your source of water located within your compound?

Yes  No

↓ If no

20a. Is your water source more than 30 minutes away by foot (*to and from*)?  Yes  No

21. Does the construction of your source of water protect the water from outside contamination?  Yes  No  Don't Know

22. What type of floor do you have in your home?

Cement  Tile  Wood  Dirt/clay/earth  Sand  Dung  Other \_\_\_\_\_

23. Which of these do you have in your home? (Select as many as may apply.)

Electricity (Connected to the community power grid)  Television  Radio  Refrigerator  Telephone

Air conditioner  Generating set  Personal computer  Electric fan  Cable (DSTV, etc.)

24. What is your primary cooking source? (Select only one.)  Electric cooker  Gas cooker  Kerosene stove

Charcoal or coal  Wood  Dung  Other \_\_\_\_\_

25. Do you own any of the following? (Select as many as may apply.)

Personal car or truck  Bicycle  Motorcycle  Other automobiles \_\_\_\_\_

26. Do you have National Health Insurance (NHIS)?

Yes  No (go to question 27)

↓ If yes

26a. When did you last use this insurance?  In the last 2 years  More than 2 years ago

26b. Including yourself, how many members of your household are covered by insurance? \_\_\_\_\_

27. If no insurance, what are your reasons for not having insurance? (Select as many as may apply.)

Too Expensive  Doesn't cover my medical needs/costs  Too difficult to access

Unaware of the NHIS  Other \_\_\_\_\_

28. Did you have any major medical costs in the last 2 years (regardless of insurance status)?

Yes  No

↓ If yes

28a. Please specify what for \_\_\_\_\_ and estimated cost \_\_\_\_\_ (Naira)



### Past Medical History

29. Have you ever been TOLD BY A DOCTOR/HEALER you have any of the following conditions?

|                                                 | Yes                      | No                       | If Yes → | Year of diagnosis<br>(If newly diagnosed multiple times,<br>select all that apply) |                      |                          | Currently<br>being<br>treated? |                          |
|-------------------------------------------------|--------------------------|--------------------------|----------|------------------------------------------------------------------------------------|----------------------|--------------------------|--------------------------------|--------------------------|
|                                                 |                          |                          |          | More than<br>10 years ago                                                          | 5 to 10<br>years ago | Less than 5<br>years ago | Yes                            | No                       |
| Tuberculosis (TB)                               | <input type="checkbox"/> | <input type="checkbox"/> |          |                                                                                    |                      |                          | <input type="checkbox"/>       | <input type="checkbox"/> |
| Malaria                                         | <input type="checkbox"/> | <input type="checkbox"/> |          |                                                                                    |                      |                          | <input type="checkbox"/>       | <input type="checkbox"/> |
| HIV                                             | <input type="checkbox"/> | <input type="checkbox"/> |          |                                                                                    |                      |                          | <input type="checkbox"/>       | <input type="checkbox"/> |
| Hepatitis B (HBV)                               | <input type="checkbox"/> | <input type="checkbox"/> |          |                                                                                    |                      |                          | <input type="checkbox"/>       | <input type="checkbox"/> |
| Hepatitis C (HCV)                               | <input type="checkbox"/> | <input type="checkbox"/> |          |                                                                                    |                      |                          | <input type="checkbox"/>       | <input type="checkbox"/> |
| Amoebic infection                               | <input type="checkbox"/> | <input type="checkbox"/> |          |                                                                                    |                      |                          | <input type="checkbox"/>       | <input type="checkbox"/> |
| Schistosomiasis                                 | <input type="checkbox"/> | <input type="checkbox"/> |          |                                                                                    |                      |                          | <input type="checkbox"/>       | <input type="checkbox"/> |
| Giardia                                         | <input type="checkbox"/> | <input type="checkbox"/> |          |                                                                                    |                      |                          | <input type="checkbox"/>       | <input type="checkbox"/> |
| Other parasitic infection<br>(specify)          | <input type="checkbox"/> | <input type="checkbox"/> |          |                                                                                    |                      |                          | <input type="checkbox"/>       | <input type="checkbox"/> |
| Chronic Obstructive<br>Pulmonary Disease (COPD) | <input type="checkbox"/> | <input type="checkbox"/> |          |                                                                                    |                      |                          | <input type="checkbox"/>       | <input type="checkbox"/> |
| Sickle Cell Disease (SCD)                       | <input type="checkbox"/> | <input type="checkbox"/> |          |                                                                                    |                      |                          | <input type="checkbox"/>       | <input type="checkbox"/> |
| Peptic Ulcer Disease                            | <input type="checkbox"/> | <input type="checkbox"/> |          |                                                                                    |                      |                          | <input type="checkbox"/>       | <input type="checkbox"/> |
| Diabetes                                        | <input type="checkbox"/> | <input type="checkbox"/> |          |                                                                                    |                      |                          | <input type="checkbox"/>       | <input type="checkbox"/> |
| Hypertension (high blood<br>pressure)           | <input type="checkbox"/> | <input type="checkbox"/> |          |                                                                                    |                      |                          | <input type="checkbox"/>       | <input type="checkbox"/> |
| Myocardial infarction<br>(heart attack)         | <input type="checkbox"/> | <input type="checkbox"/> |          |                                                                                    |                      |                          | <input type="checkbox"/>       | <input type="checkbox"/> |
| High cholesterol                                | <input type="checkbox"/> | <input type="checkbox"/> |          |                                                                                    |                      |                          | <input type="checkbox"/>       | <input type="checkbox"/> |
| Stroke or mini-stroke                           | <input type="checkbox"/> | <input type="checkbox"/> |          |                                                                                    |                      |                          | <input type="checkbox"/>       | <input type="checkbox"/> |
| Asthma                                          | <input type="checkbox"/> | <input type="checkbox"/> |          |                                                                                    |                      |                          | <input type="checkbox"/>       | <input type="checkbox"/> |
| Epilepsy                                        | <input type="checkbox"/> | <input type="checkbox"/> |          |                                                                                    |                      |                          | <input type="checkbox"/>       | <input type="checkbox"/> |
| Cancer<br>(specify)                             | <input type="checkbox"/> | <input type="checkbox"/> |          |                                                                                    |                      |                          | <input type="checkbox"/>       | <input type="checkbox"/> |

30. (FOR CASES ADD: Prior to your visit/s for your cancer diagnosis) when was the last time you received care in a hospital?

Less than 1 year ago     1-4 years ago     5-10 years ago     More than 10 years ago

31. Have you ever seen a traditional healer?

Yes     No (go to question 32)

↓ If yes

Saw <2 YEARS AGO

Saw 2+ YEARS AGO

↓

31a. Did you receive any treatment?     Yes \_\_\_\_\_ (specify)     No

32. Do you use traditional remedies at home?

Yes \_\_\_\_\_ (specify)     No (go to question 33)

↓ If yes

Used <2 YEARS AGO

Used 2+ YEARS AGO

**Screening History**

33. Have you ever had colorectal cancer screening?  Yes  No (go to question 34)  Never heard of this (go to question 34)  
 (e.g., Colonoscopy/sigmoidoscopy, stool test)  
 \*Colonoscopy/sigmoidoscopy: internal view of intestines/colon via inserted camera\*  
 Colonoscopy/sigmoidoscopy <10 YEARS AGO  
 Colonoscopy/sigmoidoscopy 10+ YEARS AGO  
 Stool test <2 YEARS AGO  
 Stool test 2+ YEARS AGO

↓  
 33a. Did you receive any treatment?  
 Yes \_\_\_\_\_ (specify)  No

34. (FOR WOMEN ONLY)

Have you ever had cervical cancer screening?  Yes  No (go to question 35)  Never heard of this (go to question 35)  
 (e.g. Pap smear, HPV testing)  
 \*collecting cells from cervix to test for cancer\*  
 cervical cancer screening <3 YEARS AGO  
 cervical cancer screening 3+ YEARS AGO

↓  
 34a. Did you receive any treatment?  
 Yes \_\_\_\_\_ (specify)  No

35. (FOR WOMEN ONLY)

Have you ever had breast cancer screening?  Yes  No (go to question 36)  Never heard of this (go to question 36)  
 (e.g. Mammogram)  
 \*x-ray of breasts\*  
 Mammogram <2 YEARS AGO  
 Mammogram 2+ YEARS AGO

↓  
 35a. Did you receive any treatment?  
 Yes \_\_\_\_\_ (specify)  No

**Family History**

36. Have any of these relatives had the following cancers? (Select as many as may apply.)  
 No family history of cancer (go to question 37)

|                               | Mother | Father | Brother | Sister |
|-------------------------------|--------|--------|---------|--------|
| Lung                          |        |        |         |        |
| Breast                        |        |        |         |        |
| Colon or rectal               |        |        |         |        |
| Prostate                      |        |        |         |        |
| Cervical                      |        |        |         |        |
| Uterine (endometrial)         |        |        |         |        |
| Ovarian                       |        |        |         |        |
| Pancreas                      |        |        |         |        |
| Other/unknown _____ (specify) |        |        |         |        |

37. Have any of these relatives had the following conditions? (Select as many as may apply.)

No family history of the below conditions (go to question 38)

|                                      | Mother | Father | Brother | Sister |
|--------------------------------------|--------|--------|---------|--------|
| Diabetes                             |        |        |         |        |
| Hypertension (high blood pressure)   |        |        |         |        |
| Myocardial infarction (heart attack) |        |        |         |        |
| High cholesterol                     |        |        |         |        |
| Stroke or mini-stroke                |        |        |         |        |

**Smoking & Alcohol History**

38. Have you smoked 5 packs of cigarettes (100) or more in your lifetime?

Yes, smoked in past, but quit

Yes, currently smoke

No (go to question 39)

↓ If smoked in past

↓ If currently smoke

Quit <2 YEARS AGO

Quit 2+ YEARS AGO

↓

| <b>38a. At each age: Average number of cigarettes per day</b> |      |     |      |       |       |       |     |
|---------------------------------------------------------------|------|-----|------|-------|-------|-------|-----|
|                                                               | None | 1-4 | 5-14 | 15-24 | 25-35 | 36-44 | 45+ |
| Current                                                       |      |     |      |       |       |       |     |
| <2 years ago                                                  |      |     |      |       |       |       |     |
| Age < 15 years                                                |      |     |      |       |       |       |     |
| Age 15-19 years                                               |      |     |      |       |       |       |     |
| Age 20-29 years (if applicable)                               |      |     |      |       |       |       |     |
| Age 30-39 years (if applicable)                               |      |     |      |       |       |       |     |
| Age 40-49 years (if applicable)                               |      |     |      |       |       |       |     |
| Age 50-59 years (if applicable)                               |      |     |      |       |       |       |     |
| Age 60 to the present (if applicable)                         |      |     |      |       |       |       |     |

39. Have you ever smoked any substance other than cigarettes?  Yes \_\_\_\_\_ (specify)  No

40. Have you had 10 or more drinks of alcohol in your lifetime?

\*A drink = bottle/can of beer or, glass of wine or, shot of liquor\*

Yes, drank in past, but quit

Yes, currently drink alcohol

No (go to question 41)

↓ If drank in past

↓ If currently drink

Quit <2 YEARS AGO

Quit 2+ YEARS AGO

↓

| <b>40a. At each time period: Usual number of drinks (e.g., total number of bottles/cans of beer, glasses of wine, shots of liquor)</b> |                               |               |            |              |              |               |              |
|----------------------------------------------------------------------------------------------------------------------------------------|-------------------------------|---------------|------------|--------------|--------------|---------------|--------------|
|                                                                                                                                        | None or less than 1 per month | 1-3 per month | 1 per week | 2-4 per week | 5-6 per week | 7-13 per week | 14+ per week |
| Current                                                                                                                                |                               |               |            |              |              |               |              |
| <2 years ago                                                                                                                           |                               |               |            |              |              |               |              |
| 2+ years ago                                                                                                                           |                               |               |            |              |              |               |              |

**Medication History**

**\*FOR CASES: replace "in the last 2 years" with "when you were well" for all questions in medication history section\***

**41. Have you taken any of the following medications?**

|                                                                                 | Ever taken                                               | IF yes → | Taken in the past 2 years*                               | IF Yes → | Frequency <i>*in the last 2 years*</i><br>(*FOR CASES USE: when you were well) |                  |                |                 |                 |                |
|---------------------------------------------------------------------------------|----------------------------------------------------------|----------|----------------------------------------------------------|----------|--------------------------------------------------------------------------------|------------------|----------------|-----------------|-----------------|----------------|
|                                                                                 |                                                          |          |                                                          |          | 1 day a month or less                                                          | 2-3 days a month | One day a week | 2-3 days a week | 4-5 days a week | 6+ days a week |
| Acetaminophen (e.g., Panadol, Paracetamol, Tylenol)                             | <input type="checkbox"/> Yes <input type="checkbox"/> No |          | <input type="checkbox"/> Yes <input type="checkbox"/> No |          |                                                                                |                  |                |                 |                 |                |
| Aspirin (e.g., Anacin, Bufferin, Alka-Seltzer)                                  | <input type="checkbox"/> Yes <input type="checkbox"/> No |          | <input type="checkbox"/> Yes <input type="checkbox"/> No |          |                                                                                |                  |                |                 |                 |                |
| Other anti-inflammatory (e.g., Ibuprofen, Diclofenac, Indocin, Naprosyn, Advil) | <input type="checkbox"/> Yes <input type="checkbox"/> No |          | <input type="checkbox"/> Yes <input type="checkbox"/> No |          |                                                                                |                  |                |                 |                 |                |
| Anti-high blood pressure                                                        | <input type="checkbox"/> Yes <input type="checkbox"/> No |          | <input type="checkbox"/> Yes <input type="checkbox"/> No |          |                                                                                |                  |                |                 |                 |                |
| Anti-diabetic (e.g., Metformin)                                                 | <input type="checkbox"/> Yes <input type="checkbox"/> No |          | <input type="checkbox"/> Yes <input type="checkbox"/> No |          |                                                                                |                  |                |                 |                 |                |
| Anti-high cholesterol                                                           | <input type="checkbox"/> Yes <input type="checkbox"/> No |          | <input type="checkbox"/> Yes <input type="checkbox"/> No |          |                                                                                |                  |                |                 |                 |                |
| Multivitamin                                                                    | <input type="checkbox"/> Yes <input type="checkbox"/> No |          | <input type="checkbox"/> Yes <input type="checkbox"/> No |          |                                                                                |                  |                |                 |                 |                |
| Folate only/vitamin B9 supplement                                               | <input type="checkbox"/> Yes <input type="checkbox"/> No |          | <input type="checkbox"/> Yes <input type="checkbox"/> No |          |                                                                                |                  |                |                 |                 |                |
| Calcium only supplement                                                         | <input type="checkbox"/> Yes <input type="checkbox"/> No |          | <input type="checkbox"/> Yes <input type="checkbox"/> No |          |                                                                                |                  |                |                 |                 |                |
| Vitamin D only supplement                                                       | <input type="checkbox"/> Yes <input type="checkbox"/> No |          | <input type="checkbox"/> Yes <input type="checkbox"/> No |          |                                                                                |                  |                |                 |                 |                |
| Steroid                                                                         | <input type="checkbox"/> Yes <input type="checkbox"/> No |          | <input type="checkbox"/> Yes <input type="checkbox"/> No |          |                                                                                |                  |                |                 |                 |                |
| Herbal supplements                                                              | <input type="checkbox"/> Yes <input type="checkbox"/> No |          | <input type="checkbox"/> Yes <input type="checkbox"/> No |          |                                                                                |                  |                |                 |                 |                |

**42. Have you EVER taken an antibiotic?**

Yes  No (go to question 44)

↓ If yes

**42a. Select as many as may apply:**

- Cipro tab (ciprofloxacin)   
  Flagyl (metronidazole)   
  Erythromycin   
  Ampiclox (ampicillin cloxacillin)  
 Amoxil (amoxicillin)   
  Other antibiotic \_\_\_\_\_ (specify)

**42b. Have you taken any antibiotic *\*in the last 2 years\** (**\*FOR CASES USE: When you were well\***)?**

Yes, taken in past, but stopped   
  Yes, currently taking   
  No

↓ If taken in past

- Most recently stopped <6 WEEKS AGO  
 Most recently stopped 6+ WEEKS AGO

**43. At each period of your life: Indicate the TOTAL amount of time you used any antibiotics:**

|                                       | None | Less than 7 days | 8-15 days | 16 days to 2 months | >2-4 months | >4 months to 2 years | >2-4 years | 4+ years |
|---------------------------------------|------|------------------|-----------|---------------------|-------------|----------------------|------------|----------|
| During the past 2 years               |      |                  |           |                     |             |                      |            |          |
| Age < 19 years                        |      |                  |           |                     |             |                      |            |          |
| Age 20-39 years (if applicable)       |      |                  |           |                     |             |                      |            |          |
| Age 40-59 years (if applicable)       |      |                  |           |                     |             |                      |            |          |
| Age 60 to the present (if applicable) |      |                  |           |                     |             |                      |            |          |

44. Have you EVER taken an antiparasitic/anthelmintic medication?

Yes  No (go to question 46)

↓ If yes

44a. Select as many as may apply:

Zentel (albendazole)  Ivermectin  Combantrin (mebendazole)  Kentrax

Other antiparasitic/anthelmintic \_\_\_\_\_ (specify)

44b. Have you taken **any** antiparasitic/anthelmintic *in the last 2 years\** (**\*FOR CASES USE: When you were well\***)?

Yes, taken in past, but stopped  Yes, currently taking  No

↓ If taken in past

Most recently stopped <6 WEEKS AGO

Most recently stopped 6+ WEEKS AGO

45. At each period of your life: Indicate the TOTAL amount of time you used **any** antiparasitic/anthelmintics:

|                                       | None | Less than 7 days | 8-15 days | 16 days to 2 months | >2-4 months | >4 months to 2 years | >2-4 years | 4+ years |
|---------------------------------------|------|------------------|-----------|---------------------|-------------|----------------------|------------|----------|
| During the past 2 years               |      |                  |           |                     |             |                      |            |          |
| Age < 19 years                        |      |                  |           |                     |             |                      |            |          |
| Age 20-39 years (if applicable)       |      |                  |           |                     |             |                      |            |          |
| Age 40-59 years (if applicable)       |      |                  |           |                     |             |                      |            |          |
| Age 60 to the present (if applicable) |      |                  |           |                     |             |                      |            |          |

46. Have you EVER taken an antimalarial medication?

Yes  No (go to question 48)

↓ If yes

46a. Select as many as may apply:  Artemether/lumefantrine (e.g., Coartem, Lonart, Artefan)  Arteether (e.g., E Mal)

Artesunate/mefloquine (e.g., Artequin)  Pyrimethamine/sulfadoxine (e.g., Fansidar)  Amodiaquine (Camoquin)

Chloroquine (e.g., Aralen)  Atovaquone/proguanil (e.g., Malarone)  Quinine

Other antimalarial \_\_\_\_\_ (specify)

46b. Have you taken **any** antimalarial *in the last 2 years\** (**\*FOR CASES USE: When you were well\***)?

Yes, taken in past, but stopped  Yes, currently taking  No

↓ If taken in past

Most recently stopped <6 WEEKS AGO

Most recently stopped 6+ WEEKS AGO

47. At each period of your life: Indicate the TOTAL amount of time you used **any** antimalarial:

|                                       | None | Less than 7 days | 8-15 days | 16 days to 2 months | >2-4 months | >4 months to 2 years | >2-4 years | 4+ years |
|---------------------------------------|------|------------------|-----------|---------------------|-------------|----------------------|------------|----------|
| During the past 2 years               |      |                  |           |                     |             |                      |            |          |
| Age < 19 years                        |      |                  |           |                     |             |                      |            |          |
| Age 20-39 years (if applicable)       |      |                  |           |                     |             |                      |            |          |
| Age 40-59 years (if applicable)       |      |                  |           |                     |             |                      |            |          |
| Age 60 to the present (if applicable) |      |                  |           |                     |             |                      |            |          |

**Reproductive History (THE FOLLOWING SECTION IS FOR WOMEN PARTICIPANTS ONLY; FOR MEN GO TO QUESTION 54)**

48. Age (years) your menstrual periods began? \_\_\_\_\_ (years)\* *\*If Refused/Don't Know, enter 999*

49. Have your menstrual periods stopped permanently?

Yes  No  Not sure  Refused/Don't Know

↓ If yes

49a. Age period stopped \_\_\_\_\_ (years)\* *\*If Refused/Don't Know, enter 999*

50. Have you ever been pregnant? (Do not include current pregnancy or those ending after January 1, 2017.)

Yes  No  Not sure  Refused/Don't Know

↓ If yes



**Meats, Fish, Chicken, and Eggs (Pages 1 and 3 of photographic guide)**

|                                                                             | Medium serving    | Serving |   |   | Never | Less than once a month | 1-3 times a month | 1 time a week | 2-4 times a week | 5-6 times a week | 1 time a day | 2 or more times a day |
|-----------------------------------------------------------------------------|-------------------|---------|---|---|-------|------------------------|-------------------|---------------|------------------|------------------|--------------|-----------------------|
|                                                                             |                   | S       | M | L |       |                        |                   |               |                  |                  |              |                       |
| Fried beef/veal/pork/lamb/goat                                              | 1 cut             |         |   |   |       |                        |                   |               |                  |                  |              |                       |
| Fried fish                                                                  | 1 cut             |         |   |   |       |                        |                   |               |                  |                  |              |                       |
| Fried chicken                                                               | 1 cut             |         |   |   |       |                        |                   |               |                  |                  |              |                       |
| Fried egg                                                                   | 1 egg             |         |   |   |       |                        |                   |               |                  |                  |              |                       |
| Boiled beef/veal/pork/lamb/goat                                             | 1 cut             |         |   |   |       |                        |                   |               |                  |                  |              |                       |
| Boiled fish/chicken/egg                                                     | 1 cut/<br>1 egg   |         |   |   |       |                        |                   |               |                  |                  |              |                       |
| Smoked beef/veal/pork/lamb/goat                                             | 1 cut             |         |   |   |       |                        |                   |               |                  |                  |              |                       |
| Smoked fish                                                                 | 1 cut             |         |   |   |       |                        |                   |               |                  |                  |              |                       |
| Grilled/roasted beef/veal/pork/lamb/goat<br>e.g. suya, asun, kilishi, ponmo | 1 cut or 3 sticks |         |   |   |       |                        |                   |               |                  |                  |              |                       |
| Grilled/roasted fish                                                        | 1 cut             |         |   |   |       |                        |                   |               |                  |                  |              |                       |
| Offal<br>e.g. abodi, shaki, ifun                                            | 1 cut             |         |   |   |       |                        |                   |               |                  |                  |              |                       |
| Bushmeat/wildmeat                                                           | 1 cut             |         |   |   |       |                        |                   |               |                  |                  |              |                       |
| Snails                                                                      | 1 snail           |         |   |   |       |                        |                   |               |                  |                  |              |                       |
| Other _____                                                                 | _____             |         |   |   |       |                        |                   |               |                  |                  |              |                       |

**Snacks (Pages 1 and 4 of photographic guide)**

|                                                                    | Medium serving   | Serving |   |   | Never | Less than once a month | 1-3 times a month | 1 time a week | 2-4 times a week | 5-6 times a week | 1 time a day | 2 or more times a day |
|--------------------------------------------------------------------|------------------|---------|---|---|-------|------------------------|-------------------|---------------|------------------|------------------|--------------|-----------------------|
|                                                                    |                  | S       | M | L |       |                        |                   |               |                  |                  |              |                       |
| Fried snacks e.g. puff puff, chin chin, donut, buns, plantain chip | ½ cup            |         |   |   |       |                        |                   |               |                  |                  |              |                       |
| Baked Snacks<br>e.g. pie, biscuit, cake                            | 1 medium package |         |   |   |       |                        |                   |               |                  |                  |              |                       |
| Roasted /popped Snacks<br>e.g. popcorn, corn                       | ½ cup            |         |   |   |       |                        |                   |               |                  |                  |              |                       |
| Nuts<br>e.g. kola nut, gancina kola, walnut, cashew nut, tiger nut | ½ cup            |         |   |   |       |                        |                   |               |                  |                  |              |                       |
| Other _____                                                        | _____            |         |   |   |       |                        |                   |               |                  |                  |              |                       |

**Grains, Cereals, and Products (Pages 1 and 5 of photographic guide)**

|                                               | Medium serving        | Serving |   |   | Never | Less than once a month | 1-3 times a month | 1 time a week | 2-4 times a week | 5-6 times a week | 1 time a day | 2 or more times a day |
|-----------------------------------------------|-----------------------|---------|---|---|-------|------------------------|-------------------|---------------|------------------|------------------|--------------|-----------------------|
|                                               |                       | S       | M | L |       |                        |                   |               |                  |                  |              |                       |
| Fermented milled cereals<br>e.g. pap, eko     | 1 cup or 1 wrap (eko) |         |   |   |       |                        |                   |               |                  |                  |              |                       |
| Boiled cereals<br>e.g. maize, rice            | 1 cup cooked          |         |   |   |       |                        |                   |               |                  |                  |              |                       |
| Whole meal product<br>e.g. wheat, maize, rice | 1 cup or 1 wrap       |         |   |   |       |                        |                   |               |                  |                  |              |                       |
| Baked cereal products e.g. bread              | 1 loaf (N100)         |         |   |   |       |                        |                   |               |                  |                  |              |                       |
| Idomine, spaghetti, pasta, noodles            | 1 cup cooked          |         |   |   |       |                        |                   |               |                  |                  |              |                       |
| Other _____                                   | _____                 |         |   |   |       |                        |                   |               |                  |                  |              |                       |

**Legumes and Products (Pages 1, 6, and 10 of photographic guide)**

|                                                 | Medium serving         | Serving |   |   | Never | Less than once a month | 1-3 times a month | 1 time a week | 2-4 times a week | 5-6 times a week | 1 time a day | 2 or more times a day |
|-------------------------------------------------|------------------------|---------|---|---|-------|------------------------|-------------------|---------------|------------------|------------------|--------------|-----------------------|
|                                                 |                        | S       | M | L |       |                        |                   |               |                  |                  |              |                       |
| Boiled beans e.g ewa riro, moin moin, groundnut | 1 cup cooked or 1 wrap |         |   |   |       |                        |                   |               |                  |                  |              |                       |
| Fried legume product e.g akara                  | 5 balls                |         |   |   |       |                        |                   |               |                  |                  |              |                       |
| Soy product e.g cheese, milk                    | 1 cup                  |         |   |   |       |                        |                   |               |                  |                  |              |                       |
| Other _____                                     | _____                  |         |   |   |       |                        |                   |               |                  |                  |              |                       |

**Roots/Tubers and Products (Page 7 of photographic guide)**

|                                                | Medium serving  | Serving |   |   | Never | Less than once a month | 1-3 times a month | 1 time a week | 2-4 times a week | 5-6 times a week | 1 time a day | 2 or more times a day |
|------------------------------------------------|-----------------|---------|---|---|-------|------------------------|-------------------|---------------|------------------|------------------|--------------|-----------------------|
|                                                |                 | S       | M | L |       |                        |                   |               |                  |                  |              |                       |
| Boiled tubers e.g. yam, cocoyam, potatoes      | 1 cup or 1 wrap |         |   |   |       |                        |                   |               |                  |                  |              |                       |
| Cassava products e.g garri, eba, fufu          | 1 wrap          |         |   |   |       |                        |                   |               |                  |                  |              |                       |
| Fried product e.g fried yam, potatoes, cocoyam | 5 slices        |         |   |   |       |                        |                   |               |                  |                  |              |                       |
| Other _____                                    | _____           |         |   |   |       |                        |                   |               |                  |                  |              |                       |

**Fruits/ Vegetables and Products (Pages 1, 8, and 10 of photographic guide)**

|                                                                                | Medium serving   | Serving |   |   | Never | Less than once a month | 1-3 times a month | 1 time a week | 2-4 times a week | 5-6 times a week | 1 time a day | 2 or more times a day |
|--------------------------------------------------------------------------------|------------------|---------|---|---|-------|------------------------|-------------------|---------------|------------------|------------------|--------------|-----------------------|
|                                                                                |                  | S       | M | L |       |                        |                   |               |                  |                  |              |                       |
| Whole fruit e.g orange, mango, banana, agbalumo, breadfruit                    | 1 fruit (medium) |         |   |   |       |                        |                   |               |                  |                  |              |                       |
| Processed fruit                                                                | 1 cup            |         |   |   |       |                        |                   |               |                  |                  |              |                       |
| Fried plantain                                                                 | 1 fruit (medium) |         |   |   |       |                        |                   |               |                  |                  |              |                       |
| Grilled/roasted plantain e.g. Boli                                             | 1 fruit (medium) |         |   |   |       |                        |                   |               |                  |                  |              |                       |
| Leafy vegetables e.g pumpkin, amaranth, worowo, ewuro, spinach                 | ½ plate          |         |   |   |       |                        |                   |               |                  |                  |              |                       |
| Other vegetables e.g okra, onion, tomato, garden egg, cucumber, carrot, pepper | ½ cup            |         |   |   |       |                        |                   |               |                  |                  |              |                       |
| Other _____                                                                    | _____            |         |   |   |       |                        |                   |               |                  |                  |              |                       |

**Mushrooms and Products (Page 1 of photographic guide)**

|                        | Medium serving | Serving |   |   | Never | Less than once a month | 1-3 times a month | 1 time a week | 2-4 times a week | 5-6 times a week | 1 time a day | 2 or more times a day |
|------------------------|----------------|---------|---|---|-------|------------------------|-------------------|---------------|------------------|------------------|--------------|-----------------------|
|                        |                | S       | M | L |       |                        |                   |               |                  |                  |              |                       |
| Store bought mushrooms | 1 cup          |         |   |   |       |                        |                   |               |                  |                  |              |                       |
| Wild mushrooms         | 1 cup          |         |   |   |       |                        |                   |               |                  |                  |              |                       |
| Other _____            | _____          |         |   |   |       |                        |                   |               |                  |                  |              |                       |



**Seasoning and Sweeteners (Pages 1 and 9 of photographic guide)**

|                                                                                     | Medium serving           | Serving |   |   | Never | Less than once a month | 1-3 times a month | 1 time a week | 2-4 times a week | 5-6 times a week | 1 time a day | 2 or more times a day |
|-------------------------------------------------------------------------------------|--------------------------|---------|---|---|-------|------------------------|-------------------|---------------|------------------|------------------|--------------|-----------------------|
|                                                                                     |                          | S       | M | L |       |                        |                   |               |                  |                  |              |                       |
| Common Salt                                                                         | 1 teaspoon               |         |   |   |       |                        |                   |               |                  |                  |              |                       |
| Fermented seasoning agent<br>e.g Iru, ogiri                                         | 1 wrap                   |         |   |   |       |                        |                   |               |                  |                  |              |                       |
| Honey                                                                               | 1 teaspoon               |         |   |   |       |                        |                   |               |                  |                  |              |                       |
| White sugar                                                                         | 5 cubes or<br>1 teaspoon |         |   |   |       |                        |                   |               |                  |                  |              |                       |
| Artificial sweeteners<br>e.g saccharin                                              | ½<br>teaspoon            |         |   |   |       |                        |                   |               |                  |                  |              |                       |
| Oils<br>e.g palm oil, vegetable oil,<br>groundnut oil                               | 1<br>tablespoon          |         |   |   |       |                        |                   |               |                  |                  |              |                       |
| Other seasonings<br>e.g ground dried crayfish, stock<br>fish, ogbonno, dried pepper | 1<br>tablespoon          |         |   |   |       |                        |                   |               |                  |                  |              |                       |
| Other _____                                                                         | _____                    |         |   |   |       |                        |                   |               |                  |                  |              |                       |

56. How many people in your household generally eat together from your kitchen? \_\_\_\_\_

57. What type of oil do you most often use in cooking? (Select as many as may apply.)

Palm  Groundnut  Vegetable/canola  Carotino  Olive  Other \_\_\_\_\_ (specify)

58. How long does it take your family to go through a 50 cl container of cooking oil? \_\_\_\_\_ (weeks)

**Physical History**

59. CURRENTLY, does your health limit you in performing moderate activities (e.g., moving a table, pushing a vacuum cleaner, carrying light loads, walking briskly)?  Yes, limited a little  Yes, limited a lot  No

**\*NOTE: Questions 60 and 61 are strictly about activity related to your work\***

60. (FOR CASES ADD: When you were well) Does/did your WORK require any vigorous intensity activity that caused increases in breathing, heart rate, or sweating (ex. carrying or lifting heavy loads, digging or construction work, etc) for at least 10 minutes continuously?  Yes  No (go to question 61)

↓ If yes

60a. In a typical week, on how many days did you do these vigorous intensity activities as part of your work?

1 day  3-4 days  2-3 days  5+ days

60b. In a typical day, for how long did you do these vigorous intensity activities as part of your work?

10-29 minutes  30-59 minutes  1 hour  1.1 – 2 hours

2.1 – 3 hours  3.1 – 5 hours  5.1 – 7 hours  7+ hours

61. (FOR CASES ADD: When you were well) Does/did your WORK require any moderate intensity activity (ex. walking, carrying light loads, gardening, etc) for at least 10 minutes continuously?

Yes  No (go to question 62)

↓ If yes

61a. In a typical week, on how many days did you do these moderate intensity activities as part of your work?

1 day  3-4 days  2-3 days  5+ days

61b. In a typical day, for how long did you do these moderate intensity activities as part of your work?

10-29 minutes  30-59 minutes  1 hour  1.1 – 2 hours

2.1 – 3 hours  3.1 – 5 hours  5.1 – 7 hours  7+ hours

**\*NOTE: Question 62 is strictly about your activities OUTSIDE of work (includes walking to and from work)\***

**62. (FOR CASES ADD: When you were well) In the last year, what was your average time PER WEEK spent at each of the following activities **OUTSIDE OF WORK**? (Select as many as may apply.)**

|                                           | None | Less than 10 minutes | 10-29 minutes | 30-59 minutes | 1 hour | 1.1-2 hours | 2.1-3 hours | 3.1-5 hours | 5.1-7 hours | 7 or more hours |
|-------------------------------------------|------|----------------------|---------------|---------------|--------|-------------|-------------|-------------|-------------|-----------------|
| Walking (to/from work or for exercise)    |      |                      |               |               |        |             |             |             |             |                 |
| Farming                                   |      |                      |               |               |        |             |             |             |             |                 |
| Collecting water                          |      |                      |               |               |        |             |             |             |             |                 |
| Washing clothes (by hand)                 |      |                      |               |               |        |             |             |             |             |                 |
| Cooking                                   |      |                      |               |               |        |             |             |             |             |                 |
| Housecleaning                             |      |                      |               |               |        |             |             |             |             |                 |
| Lifting heavy objects                     |      |                      |               |               |        |             |             |             |             |                 |
| Jogging (slower than 6 minutes/ km)       |      |                      |               |               |        |             |             |             |             |                 |
| Running (6 minutes/km or faster)          |      |                      |               |               |        |             |             |             |             |                 |
| Bicycling                                 |      |                      |               |               |        |             |             |             |             |                 |
| Football                                  |      |                      |               |               |        |             |             |             |             |                 |
| Swimming                                  |      |                      |               |               |        |             |             |             |             |                 |
| Dancing                                   |      |                      |               |               |        |             |             |             |             |                 |
| Other vigorous activities _____ (specify) |      |                      |               |               |        |             |             |             |             |                 |
| Other moderate activities _____ (specify) |      |                      |               |               |        |             |             |             |             |                 |

**63. (FOR CASES ADD: When you were well) What is/was your average time PER DAY spent sitting or reclining in the last year?**

- 10-29 minutes     
  30-59 minutes     
  1 hour     
  1.1 – 2 hours  
 2.1 – 3 hours     
  3.1 – 5 hours     
  5.1 – 7 hours     
  7+ hours

**Work & Home Exposures**

**64. (FOR CASES ADD: When you were well) How frequently do/did you directly handle the following substances in the last year?**

|                                  | Never | 1-3 days per month | 1 day per week | 2-4 days per week | 5-6 days per week | Everyday |
|----------------------------------|-------|--------------------|----------------|-------------------|-------------------|----------|
| Burning waste (trash)            |       |                    |                |                   |                   |          |
| Asbestos (from construction)     |       |                    |                |                   |                   |          |
| Insecticides/pesticides          |       |                    |                |                   |                   |          |
| Wastes from operating industries |       |                    |                |                   |                   |          |

**Cancer Awareness**

**65. Prior to today, had you ever heard of cancer?**

- Yes     No (end of questionnaire)

↓ If yes

**65a. Prior to today, which cancers had you heard of? (Select as many as may apply.)**  Colon/rectum     Breast     Cervix

Prostate     liver     lung     Other \_\_\_\_\_ (specify)

**65b. Do you know anyone who has had cancer?**  Yes     No

**65c. Prior to today, what things did you think affect a person’s chance of developing cancer? (Select as many as may apply.)**

- Do not know/Not sure   
  Chance   
  Depends on the cancer   
  Genetics/family history   
  Body size  
 Lifestyle (e.g., smoking, alcohol)   
  Diet   
  Environment (e.g., living or working conditions)   
  Other \_\_\_\_\_ (specify)

STROBE Statement—Checklist of items that should be included in reports of *cross-sectional studies*

|                              | Item No | Recommendation                                                                                                                                                                                    | Page No  |
|------------------------------|---------|---------------------------------------------------------------------------------------------------------------------------------------------------------------------------------------------------|----------|
| <b>Title and abstract</b>    | 1       | (a) Indicate the study's design with a commonly used term in the title or the abstract                                                                                                            | 4        |
|                              |         | (b) Provide in the abstract an informative and balanced summary of what was done and what was found                                                                                               | 4        |
| <b>Introduction</b>          |         |                                                                                                                                                                                                   |          |
| Background/rationale         | 2       | Explain the scientific background and rationale for the investigation being reported                                                                                                              | 8,9      |
| Objectives                   | 3       | State specific objectives, including any prespecified hypotheses                                                                                                                                  | 9        |
| <b>Methods</b>               |         |                                                                                                                                                                                                   |          |
| Study design                 | 4       | Present key elements of study design early in the paper                                                                                                                                           | 10,11    |
| Setting                      | 5       | Describe the setting, locations, and relevant dates, including periods of recruitment, exposure, follow-up, and data collection                                                                   | 10       |
| Participants                 | 6       | (a) Give the eligibility criteria, and the sources and methods of selection of participants                                                                                                       | 10       |
| Variables                    | 7       | Clearly define all outcomes, exposures, predictors, potential confounders, and effect modifiers. Give diagnostic criteria, if applicable                                                          | 10       |
| Data sources/<br>measurement | 8*      | For each variable of interest, give sources of data and details of methods of assessment (measurement). Describe comparability of assessment methods if there is more than one group              | 11       |
| Bias                         | 9       | Describe any efforts to address potential sources of bias                                                                                                                                         | 10,11    |
| Study size                   | 10      | Explain how the study size was arrived at                                                                                                                                                         | 10       |
| Quantitative variables       | 11      | Explain how quantitative variables were handled in the analyses. If applicable, describe which groupings were chosen and why                                                                      | 11       |
| Statistical methods          | 12      | (a) Describe all statistical methods, including those used to control for confounding                                                                                                             | 12,13    |
|                              |         | (b) Describe any methods used to examine subgroups and interactions                                                                                                                               | 12,13    |
|                              |         | (c) Explain how missing data were addressed                                                                                                                                                       | 13       |
|                              |         | (d) If applicable, describe analytical methods taking account of sampling strategy                                                                                                                | n/a      |
|                              |         | (e) Describe any sensitivity analyses                                                                                                                                                             | n/a      |
| <b>Results</b>               |         |                                                                                                                                                                                                   |          |
| Participants                 | 13*     | (a) Report numbers of individuals at each stage of study—eg numbers potentially eligible, examined for eligibility, confirmed eligible, included in the study, completing follow-up, and analysed | 13       |
|                              |         | (b) Give reasons for non-participation at each stage                                                                                                                                              | 13       |
|                              |         | (c) Consider use of a flow diagram                                                                                                                                                                | n/a      |
| Descriptive data             | 14*     | (a) Give characteristics of study participants (eg demographic, clinical, social) and information on exposures and potential confounders                                                          | 13,14    |
|                              |         | (b) Indicate number of participants with missing data for each variable of interest                                                                                                               | n/a      |
| Outcome data                 | 15*     | Report numbers of outcome events or summary measures                                                                                                                                              | 14,15,16 |

|    |                          |    |                                                                                                                                                                                                              |
|----|--------------------------|----|--------------------------------------------------------------------------------------------------------------------------------------------------------------------------------------------------------------|
| 1  |                          |    |                                                                                                                                                                                                              |
| 2  | Main results             | 16 | (a) Give unadjusted estimates and, if applicable, confounder-adjusted estimates and their precision (eg, 95% confidence interval). Make clear which confounders were adjusted for and why they were included |
| 3  |                          |    | 15,16                                                                                                                                                                                                        |
| 4  |                          |    |                                                                                                                                                                                                              |
| 5  |                          |    |                                                                                                                                                                                                              |
| 6  |                          |    | (b) Report category boundaries when continuous variables were categorized                                                                                                                                    |
| 7  |                          |    | n/a                                                                                                                                                                                                          |
| 8  |                          |    |                                                                                                                                                                                                              |
| 9  |                          |    | (c) If relevant, consider translating estimates of relative risk into absolute risk for a meaningful time period                                                                                             |
| 10 |                          |    | n/a                                                                                                                                                                                                          |
| 11 | Other analyses           | 17 | Report other analyses done—eg analyses of subgroups and interactions, and sensitivity analyses                                                                                                               |
| 12 |                          |    | n/a                                                                                                                                                                                                          |
| 13 |                          |    |                                                                                                                                                                                                              |
| 14 | <b>Discussion</b>        |    |                                                                                                                                                                                                              |
| 15 | Key results              | 18 | Summarise key results with reference to study objectives                                                                                                                                                     |
| 16 |                          |    | 21                                                                                                                                                                                                           |
| 17 | Limitations              | 19 | Discuss limitations of the study, taking into account sources of potential bias or imprecision. Discuss both direction and magnitude of any potential bias                                                   |
| 18 |                          |    | 21-25                                                                                                                                                                                                        |
| 19 |                          |    |                                                                                                                                                                                                              |
| 20 | Interpretation           | 20 | Give a cautious overall interpretation of results considering objectives, limitations, multiplicity of analyses, results from similar studies, and other relevant evidence                                   |
| 21 |                          |    | 21-25                                                                                                                                                                                                        |
| 22 |                          |    |                                                                                                                                                                                                              |
| 23 |                          |    |                                                                                                                                                                                                              |
| 24 | Generalisability         | 21 | Discuss the generalisability (external validity) of the study results                                                                                                                                        |
| 25 |                          |    | 21-25                                                                                                                                                                                                        |
| 26 | <b>Other information</b> |    |                                                                                                                                                                                                              |
| 27 | Funding                  | 22 | Give the source of funding and the role of the funders for the present study and, if applicable, for the original study on which the present article is based                                                |
| 28 |                          |    | 1                                                                                                                                                                                                            |
| 29 |                          |    |                                                                                                                                                                                                              |
| 30 |                          |    |                                                                                                                                                                                                              |

\*Give information separately for exposed and unexposed groups.

**Note:** An Explanation and Elaboration article discusses each checklist item and gives methodological background and published examples of transparent reporting. The STROBE checklist is best used in conjunction with this article (freely available on the Web sites of PLoS Medicine at <http://www.plosmedicine.org/>, Annals of Internal Medicine at <http://www.annals.org/>, and Epidemiology at <http://www.epidem.com/>). Information on the STROBE Initiative is available at [www.strobe-statement.org](http://www.strobe-statement.org).
