# Supplementary material for: Healthcare utilisation, cancer screening and potential barriers to accessing cancer care in rural South West Nigeria: a cross-sectional study
Source: PubMed Central journal article supplement — BMJ Open. 2021 Jul 26;11(7):e040352. doi: 10.1136/bmjopen-2020-040352 (PMC8314695; doi:10.1136/bmjopen-2020-040352), 2021-07-26
Supplement: bmjopen-2020-040352supp001.pdf [file bmjopen-2020-040352supp001.pdf]

Participant ID: \_\_\_\_\_ COLORECTAL CASE / BREAST CASE / CONTROL (CIRCLE ONE)  
 Recruitment site: \_\_\_\_\_ MALE / FEMALE (CIRCLE ONE)  
 Interviewer ID: \_\_\_\_\_ Date questionnaire administered: \_\_\_\_\_  
 Phone Number \_\_\_\_\_ Hospital Number \_\_\_\_\_  
 Name \_\_\_\_\_

**ALL INFORMATION IS STRICTLY CONFIDENTIAL AND IS TO BE USED FOR RESEARCH PURPOSES ONLY.**  
**PLEASE NOTE IN COVER SHEET REASON FOR NON-RESPONSE TO ANY QUESTIONS.**  
**PLEASE ENTER ALL WRITTEN TEXT USING ONLY CAPITAL LETTERS.**  
**PLEASE ENTER ALL NUMBERS AS VALUES ONLY WITH NO SYMBOLS OR PUNCTUATION.**

### Demographic History

1. What is your date of birth (DAY/MONTH/YEAR)? \_\_\_\_\_ / \_\_\_\_\_ / \_\_\_\_\_
2. (FOR CASES ONLY) When did you last feel well (i.e., mostly unaffected by pain/discomfort)? \_\_\_\_\_ (months ago)
3. (FOR CASES ADD: When you were well) what is/was your usual weight? (*Measure to nearest kg*) \_\_\_\_\_ (kg)
4. Has your weight changed (+/- 5 kg) in the past 2 years?  No  Increased 5+ kg  Decreased 5+ kg
- 4a. (IF PARTICIPANT CANNOT RECALL ABOVE QUESTION ACCURATELY) How has your weight changed in the past 2 years?  
 No change/very little  Decreased moderately  Decreased significantly  Increased moderately  Increased significantly
5. Which diagram best depicts your outline at each age?

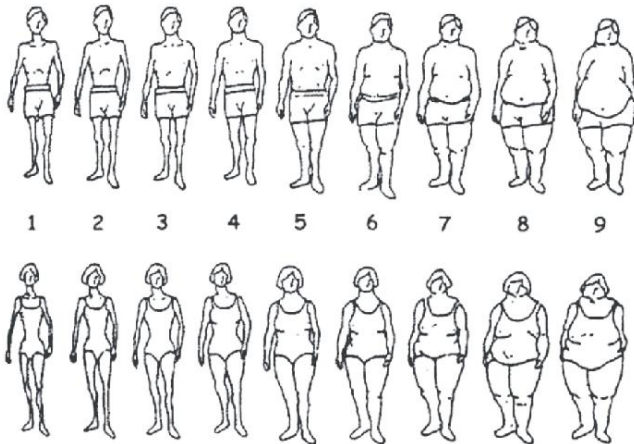

|                              | Indicate diagram (1 to 9) |
|------------------------------|---------------------------|
| Age 10 years                 |                           |
| Age 20 years                 |                           |
| Age 30 years (if applicable) |                           |
| Age 40 years (if applicable) |                           |
| Age 50 years (if applicable) |                           |
| Current                      |                           |

6. What is your height? (*Measure to nearest cm*) \_\_\_\_\_ (cm)
7. What is your current marital status?  Single  Widowed  Married  Divorced
8. Has anyone in your immediate family (e.g., parents, siblings, children) completed secondary school or above?  Yes  No
9. What is the highest educational level you have completed?  
 No formal education  Primary  Secondary  Vocational/technical  University  Graduate school
10. What is/was your occupation at the following 2 time periods?

|                       | Unemployed | Pensioner | Civil Servant | Trader | Farmer | Driver | Self Employed | Retired | Student | Other |
|-----------------------|------------|-----------|---------------|--------|--------|--------|---------------|---------|---------|-------|
| Current               |            |           |               |        |        |        |               |         |         |       |
| Less than 2 years ago |            |           |               |        |        |        |               |         |         |       |
| More than 2 years ago |            |           |               |        |        |        |               |         |         |       |

11. What is your current religion?  Christian  Muslim  Traditional  Other \_\_\_\_\_ (specify)

12. What is your current address? House Number \_\_\_\_\_ Street/Suburb Name \_\_\_\_\_ Town \_\_\_\_\_

LGA/District \_\_\_\_\_ Landmark \_\_\_\_\_ Village Name \_\_\_\_\_

12a. (FOR STUDY PERSONNEL ONLY) Does the participant live in a rural or urban geographic area?  Rural  Urban

12b. (FOR LAGOS STUDY PERSONNEL ONLY) Does the participant live in a high, medium, or low socioeconomic geographic area?  
 High  Medium  Low

13. What tribe do you belong to?  Yoruba  Ibo  Hausa  Other \_\_\_\_\_ (specify)

14. Including yourself, how many people live in your household? \_\_\_\_\_

15. Including you, what was your household's AVERAGE MONTHLY combined income (including all sources) over the last year?

\_\_\_\_\_ (Naira)  Refused/Don't Know

↓ If refused/don't know

15a. Was your household's AVERAGE MONTHLY combined income last year less than 21000 Naira?  Yes  No

15b. Was your household's AVERAGE MONTHLY combined income last year less than 34000 Naira?  Yes  No

16. What was your personal AVERAGE MONTHLY income (including all sources) over the last year?

\_\_\_\_\_ (Naira)  Refused/Don't Know

↓ If refused/don't know

16a. Was your personal AVERAGE MONTHLY income last year less than 21000 Naira?  Yes  No

16b. Was your personal AVERAGE MONTHLY income last year less than 34000 Naira?  Yes  No

17. What type of toilet do you have at home?  Water system (flushable)  Pit latrine with vent pipe  Unventilated pit latrine  
 Bush  Bucket  Composting toilet  Other \_\_\_\_\_

18. Is your toilet shared with another household?  Yes  No

19. What is the source of your water supply?  Pipe borne  Public tap  Borehole or pump  Dug well  
 River/spring  Rain harvested water  Other \_\_\_\_\_

20. Is your source of water located within your compound?

Yes  No

↓ If no

20a. Is your water source more than 30 minutes away by foot (to and from)?  Yes  No

21. Does the construction of your source of water protect the water from outside contamination?  Yes  No  Don't Know

22. What type of floor do you have in your home?

Cement  Tile  Wood  Dirt/clay/earth  Sand  Dung  Other \_\_\_\_\_

23. Which of these do you have in your home? (Select as many as may apply.)

Electricity (Connected to the community power grid)  Television  Radio  Refrigerator  Telephone  
 Air conditioner  Generating set  Personal computer  Electric fan  Cable (DSTV, etc.)

24. What is your primary cooking source? (Select only one.)  Electric cooker  Gas cooker  Kerosene stove

Charcoal or coal  Wood  Dung  Other \_\_\_\_\_

25. Do you own any of the following? (Select as many as may apply.)

Personal car or truck  Bicycle  Motorcycle  Other automobiles \_\_\_\_\_

26. Do you have National Health Insurance (NHIS)?

Yes  No (go to question 27)

↓ If yes

26a. When did you last use this insurance?  In the last 2 years  More than 2 years ago

26b. Including yourself, how many members of your household are covered by insurance? \_\_\_\_\_

27. If no insurance, what are your reasons for not having insurance? (Select as many as may apply.)

Too Expensive  Doesn't cover my medical needs/costs  Too difficult to access

Unaware of the NHIS  Other \_\_\_\_\_

28. Did you have any major medical costs in the last 2 years (regardless of insurance status)?

Yes  No

↓ If yes

28a. Please specify what for \_\_\_\_\_ and estimated cost \_\_\_\_\_ (Naira)

**Past Medical History**

29. Have you ever been **TOLD BY A DOCTOR/HEALER** you have any of the following conditions?

|                                                 | Yes                      | No                       | If Yes → | Year of diagnosis<br>(If newly diagnosed multiple times,<br>select all that apply) |           |            | Currently<br>being<br>treated? |                          |
|-------------------------------------------------|--------------------------|--------------------------|----------|------------------------------------------------------------------------------------|-----------|------------|--------------------------------|--------------------------|
|                                                 |                          |                          |          | Before 2008                                                                        | 2008-2013 | After 2013 | Yes                            | No                       |
| Tuberculosis (TB)                               | <input type="checkbox"/> | <input type="checkbox"/> |          |                                                                                    |           |            | <input type="checkbox"/>       | <input type="checkbox"/> |
| Malaria                                         | <input type="checkbox"/> | <input type="checkbox"/> |          |                                                                                    |           |            | <input type="checkbox"/>       | <input type="checkbox"/> |
| HIV                                             | <input type="checkbox"/> | <input type="checkbox"/> |          |                                                                                    |           |            | <input type="checkbox"/>       | <input type="checkbox"/> |
| Hepatitis B (HBV)                               | <input type="checkbox"/> | <input type="checkbox"/> |          |                                                                                    |           |            | <input type="checkbox"/>       | <input type="checkbox"/> |
| Hepatitis C (HCV)                               | <input type="checkbox"/> | <input type="checkbox"/> |          |                                                                                    |           |            | <input type="checkbox"/>       | <input type="checkbox"/> |
| Amoebic infection                               | <input type="checkbox"/> | <input type="checkbox"/> |          |                                                                                    |           |            | <input type="checkbox"/>       | <input type="checkbox"/> |
| Schistosomiasis                                 | <input type="checkbox"/> | <input type="checkbox"/> |          |                                                                                    |           |            | <input type="checkbox"/>       | <input type="checkbox"/> |
| Giardia                                         | <input type="checkbox"/> | <input type="checkbox"/> |          |                                                                                    |           |            | <input type="checkbox"/>       | <input type="checkbox"/> |
| Other parasitic infection<br>(specify)          | <input type="checkbox"/> | <input type="checkbox"/> |          |                                                                                    |           |            | <input type="checkbox"/>       | <input type="checkbox"/> |
| Chronic Obstructive<br>Pulmonary Disease (COPD) | <input type="checkbox"/> | <input type="checkbox"/> |          |                                                                                    |           |            | <input type="checkbox"/>       | <input type="checkbox"/> |
| Sickle Cell Disease (SCD)                       | <input type="checkbox"/> | <input type="checkbox"/> |          |                                                                                    |           |            | <input type="checkbox"/>       | <input type="checkbox"/> |
| Peptic Ulcer Disease                            | <input type="checkbox"/> | <input type="checkbox"/> |          |                                                                                    |           |            | <input type="checkbox"/>       | <input type="checkbox"/> |
| Diabetes                                        | <input type="checkbox"/> | <input type="checkbox"/> |          |                                                                                    |           |            | <input type="checkbox"/>       | <input type="checkbox"/> |
| Hypertension (high blood<br>pressure)           | <input type="checkbox"/> | <input type="checkbox"/> |          |                                                                                    |           |            | <input type="checkbox"/>       | <input type="checkbox"/> |
| Myocardial infarction<br>(heart attack)         | <input type="checkbox"/> | <input type="checkbox"/> |          |                                                                                    |           |            | <input type="checkbox"/>       | <input type="checkbox"/> |
| High cholesterol                                | <input type="checkbox"/> | <input type="checkbox"/> |          |                                                                                    |           |            | <input type="checkbox"/>       | <input type="checkbox"/> |
| Stroke or mini-stroke                           | <input type="checkbox"/> | <input type="checkbox"/> |          |                                                                                    |           |            | <input type="checkbox"/>       | <input type="checkbox"/> |
| Asthma                                          | <input type="checkbox"/> | <input type="checkbox"/> |          |                                                                                    |           |            | <input type="checkbox"/>       | <input type="checkbox"/> |
| Epilepsy                                        | <input type="checkbox"/> | <input type="checkbox"/> |          |                                                                                    |           |            | <input type="checkbox"/>       | <input type="checkbox"/> |
| Cancer<br>(specify)                             | <input type="checkbox"/> | <input type="checkbox"/> |          |                                                                                    |           |            | <input type="checkbox"/>       | <input type="checkbox"/> |

30. (FOR CASES ADD: Prior to your visit/s for your cancer diagnosis) when was the last time you received care in a hospital?

Less than 1 year ago    1-4 years ago    5-10 years ago    More than 10 years ago

31. Have you ever seen a traditional healer?

Yes    No (go to question 32)

↓ If yes

Saw <2 YEARS AGO

Saw 2+ YEARS AGO

↓

31a. Did you receive any treatment?    Yes \_\_\_\_\_ (specify)    No

32. Do you use traditional remedies at home?

Yes \_\_\_\_\_ (specify)    No (go to question 33)

↓ If yes

Used <2 YEARS AGO

Used 2+ YEARS AGO

**Screening History**

**33.** Have you ever had colorectal cancer screening?  Yes  No (go to question 34)  Never heard of this (go to question 34)  
(e.g., Colonoscopy/sigmoidoscopy, stool test)

\*Colonoscopy/sigmoidoscopy: internal view of intestines/colon via inserted camera\*

- ↓ If yes (Select all that apply.)
- Colonoscopy/sigmoidoscopy <10 YEARS AGO  
 Colonoscopy/sigmoidoscopy 10+ YEARS AGO  
 Stool test <2 YEARS AGO  
 Stool test 2+ YEARS AGO

↓

**33a.** Did you receive any treatment?

- Yes \_\_\_\_\_ (specify)  No

**34. (FOR WOMEN ONLY)**

Have you ever had cervical cancer screening?  
(e.g. Pap smear, HPV testing)

\*collecting cells from cervix to test for cancer\*

Yes  No (go to question 35)  Never heard of this (go to question 35)

↓ If yes

- cervical cancer screening <3 YEARS AGO  
 cervical cancer screening 3+ YEARS AGO

↓

**34a.** Did you receive any treatment?

- Yes \_\_\_\_\_ (specify)  No

**35. (FOR WOMEN ONLY)**

Have you ever had breast cancer screening?  
(e.g. Mammogram)

\*x-ray of breasts\*

Yes  No (go to question 36)  Never heard of this (go to question 36)

↓ If yes

- Mammogram <2 YEARS AGO  
 Mammogram 2+ YEARS AGO

↓

**35a.** Did you receive any treatment?

- Yes \_\_\_\_\_ (specify)  No

**Family History**

**36.** Have any of these relatives had the following cancers? (Select as many as may apply.)

No family history of cancer (go to question 37)

|                               | Mother | Father | Brother | Sister |
|-------------------------------|--------|--------|---------|--------|
| Lung                          |        |        |         |        |
| Breast                        |        |        |         |        |
| Colon or rectal               |        |        |         |        |
| Prostate                      |        |        |         |        |
| Cervical                      |        |        |         |        |
| Uterine (endometrial)         |        |        |         |        |
| Ovarian                       |        |        |         |        |
| Pancreas                      |        |        |         |        |
| Other/unknown _____ (specify) |        |        |         |        |

**37.** Have any of these relatives had the following conditions? (Select as many as may apply.)

No family history of the below conditions (go to question 38)

|                                      | Mother | Father | Brother | Sister |
|--------------------------------------|--------|--------|---------|--------|
| Diabetes                             |        |        |         |        |
| Hypertension (high blood pressure)   |        |        |         |        |
| Myocardial infarction (heart attack) |        |        |         |        |
| High cholesterol                     |        |        |         |        |
| Stroke or mini-stroke                |        |        |         |        |

**Smoking & Alcohol History**

38. Have you smoked 5 packs of cigarettes (100) or more in your lifetime?

Yes, smoked in past, but quit       Yes, currently smoke       No (go to question 39)

↓ If smoked in past

Quit <2 YEARS AGO

Quit 2+ YEARS AGO

↓

↓ If currently smoke

| 38a. At each age: Average number of cigarettes per day |      |     |      |       |       |       |     |
|--------------------------------------------------------|------|-----|------|-------|-------|-------|-----|
|                                                        | None | 1-4 | 5-14 | 15-24 | 25-35 | 36-44 | 45+ |
| Current                                                |      |     |      |       |       |       |     |
| <2 years ago                                           |      |     |      |       |       |       |     |
| Age < 15 years                                         |      |     |      |       |       |       |     |
| Age 15-19 years                                        |      |     |      |       |       |       |     |
| Age 20-29 years (if applicable)                        |      |     |      |       |       |       |     |
| Age 30-39 years (if applicable)                        |      |     |      |       |       |       |     |
| Age 40-49 years (if applicable)                        |      |     |      |       |       |       |     |
| Age 50-59 years (if applicable)                        |      |     |      |       |       |       |     |
| Age 60 to the present (if applicable)                  |      |     |      |       |       |       |     |

39. Have you ever smoked any substance other than cigarettes?  Yes \_\_\_\_\_ (specify)       No

40. Have you had 10 or more drinks of alcohol in your lifetime?

\*A drink = bottle/can of beer or, glass of wine or, shot of liquor\*

Yes, drank in past, but quit       Yes, currently drink alcohol       No (go to question 41)

↓ If drank in past

Quit <2 YEARS AGO

Quit 2+ YEARS AGO

↓

↓ If currently drink

| 40a. At each time period: Usual number of drinks (e.g., total number of bottles/cans of beer, glasses of wine, shots of liquor) |                               |               |            |              |              |               |              |
|---------------------------------------------------------------------------------------------------------------------------------|-------------------------------|---------------|------------|--------------|--------------|---------------|--------------|
|                                                                                                                                 | None or less than 1 per month | 1-3 per month | 1 per week | 2-4 per week | 5-6 per week | 7-13 per week | 14+ per week |
| Current                                                                                                                         |                               |               |            |              |              |               |              |
| <2 years ago                                                                                                                    |                               |               |            |              |              |               |              |
| 2+ years ago                                                                                                                    |                               |               |            |              |              |               |              |

**Medication History**

**\*FOR CASES: replace "in the last one year" with "when you were well" for all questions in medication history section\***

**41. Have you taken any of the following medications?**

|                                                                                 | Ever taken                                               | IF<br>yes<br>→ | Taken in the<br>last one<br>year*<br>(*FOR CASES<br>USE: When<br>you were<br>well*)? | IF<br>Yes<br>→ | Frequency <i>*in the last one year*</i><br>(*FOR CASES USE: when you were well) |                        |                      |                       |                       |                      |
|---------------------------------------------------------------------------------|----------------------------------------------------------|----------------|--------------------------------------------------------------------------------------|----------------|---------------------------------------------------------------------------------|------------------------|----------------------|-----------------------|-----------------------|----------------------|
|                                                                                 |                                                          |                |                                                                                      |                | 1 day a<br>month<br>or less                                                     | 2-3<br>days a<br>month | One<br>day a<br>week | 2-3<br>days a<br>week | 4-5<br>days a<br>week | 6+<br>days a<br>week |
| Acetaminophen (e.g., Panadol, Paracetamol, Tylenol)                             | <input type="checkbox"/> Yes <input type="checkbox"/> No |                | <input type="checkbox"/> Yes <input type="checkbox"/> No                             |                |                                                                                 |                        |                      |                       |                       |                      |
| Aspirin (e.g., Anacin, Bufferin, Alka-Seltzer)                                  | <input type="checkbox"/> Yes <input type="checkbox"/> No |                | <input type="checkbox"/> Yes <input type="checkbox"/> No                             |                |                                                                                 |                        |                      |                       |                       |                      |
| Other anti-inflammatory (e.g., Ibuprofen, Diclofenac, Indocin, Naprosyn, Advil) | <input type="checkbox"/> Yes <input type="checkbox"/> No |                | <input type="checkbox"/> Yes <input type="checkbox"/> No                             |                |                                                                                 |                        |                      |                       |                       |                      |
| Anti-high blood pressure                                                        | <input type="checkbox"/> Yes <input type="checkbox"/> No |                | <input type="checkbox"/> Yes <input type="checkbox"/> No                             |                |                                                                                 |                        |                      |                       |                       |                      |
| Anti-diabetic (e.g., Metformin)                                                 | <input type="checkbox"/> Yes <input type="checkbox"/> No |                | <input type="checkbox"/> Yes <input type="checkbox"/> No                             |                |                                                                                 |                        |                      |                       |                       |                      |
| Anti-high cholesterol                                                           | <input type="checkbox"/> Yes <input type="checkbox"/> No |                | <input type="checkbox"/> Yes <input type="checkbox"/> No                             |                |                                                                                 |                        |                      |                       |                       |                      |
| Multivitamin                                                                    | <input type="checkbox"/> Yes <input type="checkbox"/> No |                | <input type="checkbox"/> Yes <input type="checkbox"/> No                             |                |                                                                                 |                        |                      |                       |                       |                      |
| Folate only/vitamin B9 supplement                                               | <input type="checkbox"/> Yes <input type="checkbox"/> No |                | <input type="checkbox"/> Yes <input type="checkbox"/> No                             |                |                                                                                 |                        |                      |                       |                       |                      |
| Calcium only supplement                                                         | <input type="checkbox"/> Yes <input type="checkbox"/> No |                | <input type="checkbox"/> Yes <input type="checkbox"/> No                             |                |                                                                                 |                        |                      |                       |                       |                      |
| Vitamin D only supplement                                                       | <input type="checkbox"/> Yes <input type="checkbox"/> No |                | <input type="checkbox"/> Yes <input type="checkbox"/> No                             |                |                                                                                 |                        |                      |                       |                       |                      |
| Steroid                                                                         | <input type="checkbox"/> Yes <input type="checkbox"/> No |                | <input type="checkbox"/> Yes <input type="checkbox"/> No                             |                |                                                                                 |                        |                      |                       |                       |                      |
| Herbal supplements                                                              | <input type="checkbox"/> Yes <input type="checkbox"/> No |                | <input type="checkbox"/> Yes <input type="checkbox"/> No                             |                |                                                                                 |                        |                      |                       |                       |                      |

**42. Have you EVER taken an antibiotic?**

Yes  No (go to question 44)

↓ If yes

**42b. Have you taken any antibiotic *\*within the last 6 weeks\**?**

Yes, currently taking  Yes, but stopped  No

43. At each period of your life: Indicate the TOTAL amount of time you used **any** antibiotics:

|                                                                                                                                                                                                                     | Number of episodes | Types of antibiotics                                       | Tablet per dose | Frequency per day | Number of days |
|---------------------------------------------------------------------------------------------------------------------------------------------------------------------------------------------------------------------|--------------------|------------------------------------------------------------|-----------------|-------------------|----------------|
| In the last one year*<br>(*FOR CASES USE: When you were well*)                                                                                                                                                      |                    | <input type="checkbox"/> Ciprofloxacin                     |                 |                   |                |
|                                                                                                                                                                                                                     |                    | <input type="checkbox"/> Flagyl (metronidazole)            |                 |                   |                |
|                                                                                                                                                                                                                     |                    | <input type="checkbox"/> Erythromycin                      |                 |                   |                |
|                                                                                                                                                                                                                     |                    | <input type="checkbox"/> Ampiclox (ampicillin cloxacillin) |                 |                   |                |
|                                                                                                                                                                                                                     |                    | <input type="checkbox"/> Amoxil (amoxicillin)              |                 |                   |                |
|                                                                                                                                                                                                                     |                    | <input type="checkbox"/> Other _____ (specify)             |                 |                   |                |
| 2-3 years ago                                                                                                                                                                                                       |                    | <input type="checkbox"/> Ciprofloxacin                     |                 |                   |                |
|                                                                                                                                                                                                                     |                    | <input type="checkbox"/> Flagyl (metronidazole)            |                 |                   |                |
|                                                                                                                                                                                                                     |                    | <input type="checkbox"/> Erythromycin                      |                 |                   |                |
|                                                                                                                                                                                                                     |                    | <input type="checkbox"/> Ampiclox (ampicillin cloxacillin) |                 |                   |                |
|                                                                                                                                                                                                                     |                    | <input type="checkbox"/> Amoxil (amoxicillin)              |                 |                   |                |
|                                                                                                                                                                                                                     |                    | <input type="checkbox"/> Other _____ (specify)             |                 |                   |                |
| Other period #1 with significant antibiotic use (e.g., childhood, teenage years, 20s, 30s, etc.). Please specify _____<br><br>(NOTE TO INTERVIEWER: Inquire about use that involved long-term intake or high doses) |                    | <input type="checkbox"/> Ciprofloxacin                     |                 |                   |                |
|                                                                                                                                                                                                                     |                    | <input type="checkbox"/> Flagyl (metronidazole)            |                 |                   |                |
|                                                                                                                                                                                                                     |                    | <input type="checkbox"/> Erythromycin                      |                 |                   |                |
|                                                                                                                                                                                                                     |                    | <input type="checkbox"/> Ampiclox (ampicillin cloxacillin) |                 |                   |                |
|                                                                                                                                                                                                                     |                    | <input type="checkbox"/> Amoxil (amoxicillin)              |                 |                   |                |
|                                                                                                                                                                                                                     |                    | <input type="checkbox"/> Other _____ (specify)             |                 |                   |                |
| Other period #2 with significant antibiotic use (e.g., childhood, teenage years, 20s, 30s, etc.). Please specify _____                                                                                              |                    | <input type="checkbox"/> Ciprofloxacin                     |                 |                   |                |
|                                                                                                                                                                                                                     |                    | <input type="checkbox"/> Flagyl (metronidazole)            |                 |                   |                |
|                                                                                                                                                                                                                     |                    | <input type="checkbox"/> Erythromycin                      |                 |                   |                |
|                                                                                                                                                                                                                     |                    | <input type="checkbox"/> Ampiclox (ampicillin cloxacillin) |                 |                   |                |
|                                                                                                                                                                                                                     |                    | <input type="checkbox"/> Amoxil (amoxicillin)              |                 |                   |                |
|                                                                                                                                                                                                                     |                    | <input type="checkbox"/> Other _____ (specify)             |                 |                   |                |

44. Have you EVER taken an antiparasitic/anthelmintic medication?

Yes  No (go to question 46)

↓ If yes

44a. Have you taken **any** antiparasitic/anthelmintic antibiotic \*within the last 6 weeks\*?

Yes, currently taking  Yes, but stopped  No

45. At each period of your life: Indicate the TOTAL amount of time you used **any** antiparasitics/anthelmintics:

|                                                                                                                                                                                                                                     | Number of episodes | Types of antiparasitics/anthelmintics          | Tablet per dose | Frequency per day | Number of days |
|-------------------------------------------------------------------------------------------------------------------------------------------------------------------------------------------------------------------------------------|--------------------|------------------------------------------------|-----------------|-------------------|----------------|
| In the last one year*<br>(*FOR CASES USE: When you were well*)                                                                                                                                                                      |                    | <input type="checkbox"/> Zentel (Albendazole)  |                 |                   |                |
|                                                                                                                                                                                                                                     |                    | <input type="checkbox"/> Ivermectin            |                 |                   |                |
|                                                                                                                                                                                                                                     |                    | <input type="checkbox"/> Combtrin              |                 |                   |                |
|                                                                                                                                                                                                                                     |                    | <input type="checkbox"/> Ketrax                |                 |                   |                |
|                                                                                                                                                                                                                                     |                    | <input type="checkbox"/> Other _____ (specify) |                 |                   |                |
| 2-3 years ago                                                                                                                                                                                                                       |                    | <input type="checkbox"/> Zentel (Albendazole)  |                 |                   |                |
|                                                                                                                                                                                                                                     |                    | <input type="checkbox"/> Ivermectin            |                 |                   |                |
|                                                                                                                                                                                                                                     |                    | <input type="checkbox"/> Combtrin              |                 |                   |                |
|                                                                                                                                                                                                                                     |                    | <input type="checkbox"/> Ketrax                |                 |                   |                |
|                                                                                                                                                                                                                                     |                    | <input type="checkbox"/> Other _____ (specify) |                 |                   |                |
| Other period #1 with significant antiparasitic/anthelmintic use (e.g., childhood, teenage years, 20s, 30s, etc.). Please specify _____<br><br>(NOTE TO INTERVIEWER: Inquire about use that involved long-term intake or high doses) |                    | <input type="checkbox"/> Zentel (Albendazole)  |                 |                   |                |
|                                                                                                                                                                                                                                     |                    | <input type="checkbox"/> Ivermectin            |                 |                   |                |
|                                                                                                                                                                                                                                     |                    | <input type="checkbox"/> Combtrin              |                 |                   |                |
|                                                                                                                                                                                                                                     |                    | <input type="checkbox"/> Ketrax                |                 |                   |                |
|                                                                                                                                                                                                                                     |                    | <input type="checkbox"/> Other _____ (specify) |                 |                   |                |
| Other period #2 with significant antiparasitic/anthelmintic use (e.g., childhood, teenage years, 20s, 30s, etc.). Please specify _____                                                                                              |                    | <input type="checkbox"/> Zentel (Albendazole)  |                 |                   |                |
|                                                                                                                                                                                                                                     |                    | <input type="checkbox"/> Ivermectin            |                 |                   |                |
|                                                                                                                                                                                                                                     |                    | <input type="checkbox"/> Combtrin              |                 |                   |                |
|                                                                                                                                                                                                                                     |                    | <input type="checkbox"/> Ketrax                |                 |                   |                |
|                                                                                                                                                                                                                                     |                    | <input type="checkbox"/> Other _____ (specify) |                 |                   |                |

46. Have you EVER taken an antimalarial medication?

Yes  No (go to question 48)

↓ If yes

46a. Have you taken **any** antimalarial \*within the last 6 weeks\*?

Yes, currently taking  Yes, but stopped  No



47. At each period of your life: Indicate the TOTAL amount of time you used **any** antimalarial:

|                                                                                                                                                                                                                        | Number of episodes | Types of antimalarials                                                            | Tablet per dose | Frequency per day | Number of days |
|------------------------------------------------------------------------------------------------------------------------------------------------------------------------------------------------------------------------|--------------------|-----------------------------------------------------------------------------------|-----------------|-------------------|----------------|
| In the last one year*<br>(*FOR CASES USE: When you were well*)                                                                                                                                                         |                    | <input type="checkbox"/> Artemether/lumefantrine (e.g., Coartem, Lonart, Artefan) |                 |                   |                |
|                                                                                                                                                                                                                        |                    | <input type="checkbox"/> Arteether (e.g., E Mal)                                  |                 |                   |                |
|                                                                                                                                                                                                                        |                    | <input type="checkbox"/> Artesunate/mefloquine/amodiaquine (e.g., Artequin)       |                 |                   |                |
|                                                                                                                                                                                                                        |                    | <input type="checkbox"/> Pyrimethamine/sulfadoxine (e.g., Fansidar, Amalar)       |                 |                   |                |
|                                                                                                                                                                                                                        |                    | <input type="checkbox"/> Chloroquine (e.g., Aralen)                               |                 |                   |                |
|                                                                                                                                                                                                                        |                    | <input type="checkbox"/> Quinine                                                  |                 |                   |                |
|                                                                                                                                                                                                                        |                    | <input type="checkbox"/> Other _____ (specify)                                    |                 |                   |                |
| 2-3 years ago                                                                                                                                                                                                          |                    | <input type="checkbox"/> Artemether/lumefantrine (e.g., Coartem, Lonart, Artefan) |                 |                   |                |
|                                                                                                                                                                                                                        |                    | <input type="checkbox"/> Arteether (e.g., E Mal)                                  |                 |                   |                |
|                                                                                                                                                                                                                        |                    | <input type="checkbox"/> Artesunate/mefloquine/amodiaquine (e.g., Artequin)       |                 |                   |                |
|                                                                                                                                                                                                                        |                    | <input type="checkbox"/> Pyrimethamine/sulfadoxine (e.g., Fansidar, Amalar)       |                 |                   |                |
|                                                                                                                                                                                                                        |                    | <input type="checkbox"/> Chloroquine (e.g., Aralen)                               |                 |                   |                |
|                                                                                                                                                                                                                        |                    | <input type="checkbox"/> Quinine                                                  |                 |                   |                |
|                                                                                                                                                                                                                        |                    | <input type="checkbox"/> Other _____ (specify)                                    |                 |                   |                |
| Other period #1 with significant antibiotic use (e.g., childhood, teenage years, 20s, 30s, etc.).<br>Please specify _____<br><br>(NOTE TO INTERVIEWER: Inquire about use that involved long-term intake or high doses) |                    | <input type="checkbox"/> Artemether/lumefantrine (e.g., Coartem, Lonart, Artefan) |                 |                   |                |
|                                                                                                                                                                                                                        |                    | <input type="checkbox"/> Arteether (e.g., E Mal)                                  |                 |                   |                |
|                                                                                                                                                                                                                        |                    | <input type="checkbox"/> Artesunate/mefloquine/amodiaquine (e.g., Artequin)       |                 |                   |                |
|                                                                                                                                                                                                                        |                    | <input type="checkbox"/> Pyrimethamine/sulfadoxine (e.g., Fansidar, Amalar)       |                 |                   |                |
|                                                                                                                                                                                                                        |                    | <input type="checkbox"/> Chloroquine (e.g., Aralen)                               |                 |                   |                |
|                                                                                                                                                                                                                        |                    | <input type="checkbox"/> Quinine                                                  |                 |                   |                |
|                                                                                                                                                                                                                        |                    | <input type="checkbox"/> Other _____ (specify)                                    |                 |                   |                |
| Other period #2 with significant antibiotic use (e.g., childhood, teenage years, 20s, 30s, etc.).<br>Please specify _____                                                                                              |                    | <input type="checkbox"/> Artemether/lumefantrine (e.g., Coartem, Lonart, Artefan) |                 |                   |                |
|                                                                                                                                                                                                                        |                    | <input type="checkbox"/> Arteether (e.g., E Mal)                                  |                 |                   |                |
|                                                                                                                                                                                                                        |                    | <input type="checkbox"/> Artesunate/mefloquine/amodiaquine (e.g., Artequin)       |                 |                   |                |
|                                                                                                                                                                                                                        |                    | <input type="checkbox"/> Pyrimethamine/sulfadoxine (e.g., Fansidar, Amalar)       |                 |                   |                |
|                                                                                                                                                                                                                        |                    | <input type="checkbox"/> Chloroquine (e.g., Aralen)                               |                 |                   |                |
|                                                                                                                                                                                                                        |                    | <input type="checkbox"/> Quinine                                                  |                 |                   |                |
|                                                                                                                                                                                                                        |                    | <input type="checkbox"/> Other _____ (specify)                                    |                 |                   |                |

**Reproductive History (THE FOLLOWING SECTION IS FOR WOMEN PARTICIPANTS ONLY; FOR MEN GO TO QUESTION 54)**

- 48.** Age (years) your menstrual periods began? \_\_\_\_\_ (years)\* \*If Refused/Don't Know, enter 999
- 49.** Have your menstrual periods stopped permanently?  
 Yes  No  Not sure  Refused/Don't Know  
 ↓ If yes
- 49a.** Age period stopped \_\_\_\_\_ (years)\* \*If Refused/Don't Know, enter 999
- 50.** Have you ever been pregnant? (Do not include current pregnancy or those ending after January 1, 2017.)  
 Yes  No  Not sure  Refused/Don't Know  
 ↓ If yes
- 50a.** Age at first pregnancy \_\_\_\_\_ (years)\* \*If Refused/Don't Know, enter 999
- 50b.** Age at birth of first child \_\_\_\_\_ (years)\* \*If Refused/Don't Know, enter 999
- 50c.** Age at birth of last child \_\_\_\_\_ (years)\* \*If Refused/Don't Know, enter 999
- 50d.** Number of live births \_\_\_\_\_\* \*If Refused/Don't Know, enter 999
- 50e.** Number of incomplete pregnancies \_\_\_\_\_\* \*If Refused/Don't Know, enter 999
- 50f.** Average breastfeeding duration (months)  0  1-6  7-12  13-18  19-24  24-36  36+
- 50g.** Average time between births (years)  <1  1-2  3-4  4-7  8+ years
- 50h.** In what way/ways was your child/children delivered? (Select all that apply.)  Vaginal birth  C-section
- 51.** Have you EVER used replacement sex hormones (e.g., estrogen, progesterone)?  
 Yes, used in past, but stopped  Yes, currently use  No (go to question 52)  Refused/Don't Know (go to question 52)  
 ↓ if used in past  Stopped <2 YEARS AGO  Stopped 2+ YEARS AGO  
 ↓ If currently use
- 51a.** For how long did you use these hormones (years)?  <1  1  2  3-4  5-7  8+
- 51b.** Type of hormone used most recently?  Oral  Patch  Vaginal  Other\_\_\_\_\_
- 51c.** Hormone use pattern  Continuous  <2 weeks/month
- 52.** Have you EVER used oral contraceptives (OC's) for any reason (contraception, acne, menstrual irregularity, etc.)?  
 Yes, used in past, but stopped  Yes, currently use  No (go to question 54)  Refused/Don't Know (go to question 54)  
 ↓  Stopped <2 YEARS AGO  Stopped 2+ YEARS AGO
- 53.** (FOR CASES ADD: When you were well) What forms of contraception have you used? (Select as many as may apply.)  
 None  Oral contraceptive  Sponge  Diaphragm/cervical cap  Tubal ligation (tubes tied)  Foam or jelly  
 Intrauterine device  Condom  Vasectomy  Implant  Injection  Other\_\_\_\_\_  Refused/Don't Know

**Nutrition History**

- 54.** (FOR CASES ADD: When you were well) How often did/do you eat meals at a restaurant and/or buka in the last year?  
 Never  less than once a month  1-3 times a month  1 time a week  
 2-4 times a week  5-6 times a week  1 time a day  2 or more times a day

55. (FOR CASES ADD: When you were well) Kindly recall your food habits *during the last year* when filling this portion. (Select as many as may apply.) See **photographic guide for specific foods and medium portion size**. \*S=Small, M=Medium, L=Large\*

**Beverages and Other Drinks (Page 2 of photographic guide)**

|                                    | Medium serving | Serving |   |   | Never | Less than once a month | 1-3 times a month | 1 time a week | 2-4 times a week | 5-6 times a week | 1 time a day | 2 or more times a day |
|------------------------------------|----------------|---------|---|---|-------|------------------------|-------------------|---------------|------------------|------------------|--------------|-----------------------|
|                                    |                | S       | M | L |       |                        |                   |               |                  |                  |              |                       |
| Soft drinks e.g coca cola          | 35cl           |         |   |   |       |                        |                   |               |                  |                  |              |                       |
| Natural fruit juice                | 35cl           |         |   |   |       |                        |                   |               |                  |                  |              |                       |
| Juice blends e.g 5 alive           | 35cl           |         |   |   |       |                        |                   |               |                  |                  |              |                       |
| Milk and milk products e.g yoghurt | ½ litre        |         |   |   |       |                        |                   |               |                  |                  |              |                       |
| Kunu, sobo                         | ½ litre        |         |   |   |       |                        |                   |               |                  |                  |              |                       |
| Coffee                             | 35cl           |         |   |   |       |                        |                   |               |                  |                  |              |                       |
| Tea                                | 35cl           |         |   |   |       |                        |                   |               |                  |                  |              |                       |
| Water                              | 50 cl          |         |   |   |       |                        |                   |               |                  |                  |              |                       |
| Other _____                        | _____          |         |   |   |       |                        |                   |               |                  |                  |              |                       |

**Meats, Fish, Chicken, and Eggs (Pages 1 and 3 of photographic guide)**

|                                                                          | Medium serving    | Serving |   |   | Never | Less than once a month | 1-3 times a month | 1 time a week | 2-4 times a week | 5-6 times a week | 1 time a day | 2 or more times a day |
|--------------------------------------------------------------------------|-------------------|---------|---|---|-------|------------------------|-------------------|---------------|------------------|------------------|--------------|-----------------------|
|                                                                          |                   | S       | M | L |       |                        |                   |               |                  |                  |              |                       |
| Fried beef/veal/pork/lamb/goat                                           | 1 cut             |         |   |   |       |                        |                   |               |                  |                  |              |                       |
| Fried fish                                                               | 1 cut             |         |   |   |       |                        |                   |               |                  |                  |              |                       |
| Fried chicken                                                            | 1 cut             |         |   |   |       |                        |                   |               |                  |                  |              |                       |
| Fried egg                                                                | 1 egg             |         |   |   |       |                        |                   |               |                  |                  |              |                       |
| Boiled beef/veal/pork/lamb/goat                                          | 1 cut             |         |   |   |       |                        |                   |               |                  |                  |              |                       |
| Boiled fish/chicken/egg                                                  | 1 cut/<br>1 egg   |         |   |   |       |                        |                   |               |                  |                  |              |                       |
| Smoked beef/veal/pork/lamb/goat                                          | 1 cut             |         |   |   |       |                        |                   |               |                  |                  |              |                       |
| Smoked fish                                                              | 1 cut             |         |   |   |       |                        |                   |               |                  |                  |              |                       |
| Grilled/roasted beef/veal/pork/lamb/goat e.g. suya, asun, kilishi, ponmo | 1 cut or 3 sticks |         |   |   |       |                        |                   |               |                  |                  |              |                       |
| Grilled/roasted fish                                                     | 1 cut             |         |   |   |       |                        |                   |               |                  |                  |              |                       |
| Offal e.g. abodi, shaki, ifun                                            | 1 cut             |         |   |   |       |                        |                   |               |                  |                  |              |                       |
| Bushmeat/wildmeat                                                        | 1 cut             |         |   |   |       |                        |                   |               |                  |                  |              |                       |
| Snails                                                                   | 1 snail           |         |   |   |       |                        |                   |               |                  |                  |              |                       |
| Other _____                                                              | _____             |         |   |   |       |                        |                   |               |                  |                  |              |                       |

**Snacks (Pages 1 and 4 of photographic guide)**

|                                                                    | Medium serving   | Serving |   |   | Never | Less than once a month | 1-3 times a month | 1 time a week | 2-4 times a week | 5-6 times a week | 1 time a day | 2 or more times a day |
|--------------------------------------------------------------------|------------------|---------|---|---|-------|------------------------|-------------------|---------------|------------------|------------------|--------------|-----------------------|
|                                                                    |                  | S       | M | L |       |                        |                   |               |                  |                  |              |                       |
| Fried snacks e.g. puff puff, chin chin, donut, buns, plantain chip | ½ cup            |         |   |   |       |                        |                   |               |                  |                  |              |                       |
| Baked Snacks e.g. pie, biscuit, cake                               | 1 medium package |         |   |   |       |                        |                   |               |                  |                  |              |                       |
| Roasted /popped Snacks e.g. popcorn, corn                          | ½ cup            |         |   |   |       |                        |                   |               |                  |                  |              |                       |
| Nuts e.g. kola nut, gancina kola, walnut, cashew nut, tiger nut    | ½ cup            |         |   |   |       |                        |                   |               |                  |                  |              |                       |
| Other _____                                                        | _____            |         |   |   |       |                        |                   |               |                  |                  |              |                       |

**Grains, Cereals, and Products (Pages 1 and 5 of photographic guide)**

|                                            | Medium serving        | Serving |   |   | Never | Less than once a month | 1-3 times a month | 1 time a week | 2-4 times a week | 5-6 times a week | 1 time a day | 2 or more times a day |
|--------------------------------------------|-----------------------|---------|---|---|-------|------------------------|-------------------|---------------|------------------|------------------|--------------|-----------------------|
|                                            |                       | S       | M | L |       |                        |                   |               |                  |                  |              |                       |
| Fermented milled cereals e.g. pap, eko     | 1 cup or 1 wrap (eko) |         |   |   |       |                        |                   |               |                  |                  |              |                       |
| Boiled cereals e.g. maize, rice            | 1 cup cooked          |         |   |   |       |                        |                   |               |                  |                  |              |                       |
| Whole meal product e.g. wheat, maize, rice | 1 cup or 1 wrap       |         |   |   |       |                        |                   |               |                  |                  |              |                       |
| Baked cereal products e.g. bread           | 1 loaf (N100)         |         |   |   |       |                        |                   |               |                  |                  |              |                       |
| Idomine, spaghetti, pasta, noodles         | 1 cup cooked          |         |   |   |       |                        |                   |               |                  |                  |              |                       |
| Other _____                                | _____                 |         |   |   |       |                        |                   |               |                  |                  |              |                       |

**Legumes and Products (Pages 1, 6, and 10 of photographic guide)**

|                                                  | Medium serving         | Serving |   |   | Never | Less than once a month | 1-3 times a month | 1 time a week | 2-4 times a week | 5-6 times a week | 1 time a day | 2 or more times a day |
|--------------------------------------------------|------------------------|---------|---|---|-------|------------------------|-------------------|---------------|------------------|------------------|--------------|-----------------------|
|                                                  |                        | S       | M | L |       |                        |                   |               |                  |                  |              |                       |
| Boiled beans e.g. ewa riro, moin moin, groundnut | 1 cup cooked or 1 wrap |         |   |   |       |                        |                   |               |                  |                  |              |                       |
| Fried legume product e.g. akara                  | 5 balls                |         |   |   |       |                        |                   |               |                  |                  |              |                       |
| Soy product e.g. cheese, milk                    | 1 cup                  |         |   |   |       |                        |                   |               |                  |                  |              |                       |
| Other _____                                      | _____                  |         |   |   |       |                        |                   |               |                  |                  |              |                       |

**Roots/Tubers and Products (Page 7 of photographic guide)**

|                                                | Medium serving  | Serving |   |   | Never | Less than once a month | 1-3 times a month | 1 time a week | 2-4 times a week | 5-6 times a week | 1 time a day | 2 or more times a day |
|------------------------------------------------|-----------------|---------|---|---|-------|------------------------|-------------------|---------------|------------------|------------------|--------------|-----------------------|
|                                                |                 | S       | M | L |       |                        |                   |               |                  |                  |              |                       |
| Boiled tubers e.g. yam, cocoyam, potatoes      | 1 cup or 1 wrap |         |   |   |       |                        |                   |               |                  |                  |              |                       |
| Cassava products e.g garri, eba, fufu          | 1 wrap          |         |   |   |       |                        |                   |               |                  |                  |              |                       |
| Fried product e.g fried yam, potatoes, cocoyam | 5 slices        |         |   |   |       |                        |                   |               |                  |                  |              |                       |
| Other _____                                    | _____           |         |   |   |       |                        |                   |               |                  |                  |              |                       |

**Fruits/ Vegetables and Products (Pages 1, 8, and 10 of photographic guide)**

|                                                                                | Medium serving   | Serving |   |   | Never | Less than once a month | 1-3 times a month | 1 time a week | 2-4 times a week | 5-6 times a week | 1 time a day | 2 or more times a day |
|--------------------------------------------------------------------------------|------------------|---------|---|---|-------|------------------------|-------------------|---------------|------------------|------------------|--------------|-----------------------|
|                                                                                |                  | S       | M | L |       |                        |                   |               |                  |                  |              |                       |
| Whole fruit e.g orange, mango, banana, agbalumo, breadfruit                    | 1 fruit (medium) |         |   |   |       |                        |                   |               |                  |                  |              |                       |
| Processed fruit                                                                | 1 cup            |         |   |   |       |                        |                   |               |                  |                  |              |                       |
| Fried plantain                                                                 | 1 fruit (medium) |         |   |   |       |                        |                   |               |                  |                  |              |                       |
| Grilled/roasted plantain e.g. Boli                                             | 1 fruit (medium) |         |   |   |       |                        |                   |               |                  |                  |              |                       |
| Leafy vegetables e.g pumpkin, amaranth, worowo, ewuro, spinach                 | ½ plate          |         |   |   |       |                        |                   |               |                  |                  |              |                       |
| Other vegetables e.g okra, onion, tomato, garden egg, cucumber, carrot, pepper | ½ cup            |         |   |   |       |                        |                   |               |                  |                  |              |                       |
| Other _____                                                                    | _____            |         |   |   |       |                        |                   |               |                  |                  |              |                       |

**Mushrooms and Products (Page 1 of photographic guide)**

|                        | Medium serving | Serving |   |   | Never | Less than once a month | 1-3 times a month | 1 time a week | 2-4 times a week | 5-6 times a week | 1 time a day | 2 or more times a day |
|------------------------|----------------|---------|---|---|-------|------------------------|-------------------|---------------|------------------|------------------|--------------|-----------------------|
|                        |                | S       | M | L |       |                        |                   |               |                  |                  |              |                       |
| Store bought mushrooms | 1 cup          |         |   |   |       |                        |                   |               |                  |                  |              |                       |
| Wild mushrooms         | 1 cup          |         |   |   |       |                        |                   |               |                  |                  |              |                       |
| Other _____            | _____          |         |   |   |       |                        |                   |               |                  |                  |              |                       |

**Seasoning and Sweeteners (Pages 1 and 9 of photographic guide)**

|                                                                                     | Medium serving           | Serving |   |   | Never | Less than once a month | 1-3 times a month | 1 time a week | 2-4 times a week | 5-6 times a week | 1 time a day | 2 or more times a day |
|-------------------------------------------------------------------------------------|--------------------------|---------|---|---|-------|------------------------|-------------------|---------------|------------------|------------------|--------------|-----------------------|
|                                                                                     |                          | S       | M | L |       |                        |                   |               |                  |                  |              |                       |
| Common Salt                                                                         | 1 teaspoon               |         |   |   |       |                        |                   |               |                  |                  |              |                       |
| Fermented seasoning agent<br>e.g Iru, ogiri                                         | 1 wrap                   |         |   |   |       |                        |                   |               |                  |                  |              |                       |
| Honey                                                                               | 1 teaspoon               |         |   |   |       |                        |                   |               |                  |                  |              |                       |
| White sugar                                                                         | 5 cubes or<br>1 teaspoon |         |   |   |       |                        |                   |               |                  |                  |              |                       |
| Artificial sweeteners<br>e.g saccharin                                              | ½<br>teaspoon            |         |   |   |       |                        |                   |               |                  |                  |              |                       |
| Oils<br>e.g palm oil, vegetable oil,<br>groundnut oil                               | 1<br>tablespoon          |         |   |   |       |                        |                   |               |                  |                  |              |                       |
| Other seasonings<br>e.g ground dried crayfish, stock<br>fish, ogbonno, dried pepper | 1<br>tablespoon          |         |   |   |       |                        |                   |               |                  |                  |              |                       |
| Other _____                                                                         | _____                    |         |   |   |       |                        |                   |               |                  |                  |              |                       |

56. How many people in your household generally eat together from your kitchen? \_\_\_\_\_

57. What type of oil do you most often use in cooking? (Select as many as may apply.)

Palm  Groundnut  Vegetable/canola  Carotino  Olive  Other \_\_\_\_\_ (specify)

58. How long does it take your family to go through a 50 cl container of cooking oil? \_\_\_\_\_ (weeks)

**Physical History**

59. CURRENTLY, does your health limit you in performing moderate activities (e.g., moving a table, pushing a vacuum cleaner, carrying light loads, walking briskly)?  Yes, limited a little  Yes, limited a lot  No

**\*NOTE: Questions 60 and 61 are strictly about activity related to your work\***

60. (FOR CASES ADD: When you were well) Does/did your WORK require any vigorous intensity activity that caused increases in breathing, heart rate, or sweating (ex. carrying or lifting heavy loads, digging or construction work, etc) for at least 10 minutes continuously?  Yes  No (go to question 61)

↓ If yes

60a. In a typical week, on how many days did you do these vigorous intensity activities as part of your work?

1 day  3-4 days  2-3 days  5+ days

60b. In a typical day, for how long did you do these vigorous intensity activities as part of your work?

10-29 minutes  30-59 minutes  1 hour  1.1 – 2 hours  
 2.1 – 3 hours  3.1 – 5 hours  5.1 – 7 hours  7+ hours

61. (FOR CASES ADD: When you were well) Does/did your WORK require any moderate intensity activity (ex. walking, carrying light loads, gardening, etc) for at least 10 minutes continuously?

Yes  No (go to question 62)

↓ If yes

61a. In a typical week, on how many days did you do these moderate intensity activities as part of your work?

1 day  3-4 days  2-3 days  5+ days

61b. In a typical day, for how long did you do these moderate intensity activities as part of your work?

10-29 minutes  30-59 minutes  1 hour  1.1 – 2 hours  
 2.1 – 3 hours  3.1 – 5 hours  5.1 – 7 hours  7+ hours

**\*NOTE: Question 62 is strictly about your activities OUTSIDE of work (includes walking to and from work)\***

**62. (FOR CASES ADD: When you were well) In the last year, what was your average time PER WEEK spent at each of the following activities OUTSIDE OF WORK? (Select as many as may apply.)**

|                                           | None | Less than 10 minutes | 10-29 minutes | 30-59 minutes | 1 hour | 1.1-2 hours | 2.1-3 hours | 3.1-5 hours | 5.1-7 hours | 7 or more hours |
|-------------------------------------------|------|----------------------|---------------|---------------|--------|-------------|-------------|-------------|-------------|-----------------|
| Walking (to/from work or for exercise)    |      |                      |               |               |        |             |             |             |             |                 |
| Farming                                   |      |                      |               |               |        |             |             |             |             |                 |
| Collecting water                          |      |                      |               |               |        |             |             |             |             |                 |
| Washing clothes (by hand)                 |      |                      |               |               |        |             |             |             |             |                 |
| Cooking                                   |      |                      |               |               |        |             |             |             |             |                 |
| Housecleaning                             |      |                      |               |               |        |             |             |             |             |                 |
| Lifting heavy objects                     |      |                      |               |               |        |             |             |             |             |                 |
| Jogging (slower than 6 minutes/ km)       |      |                      |               |               |        |             |             |             |             |                 |
| Running (6 minutes/km or faster)          |      |                      |               |               |        |             |             |             |             |                 |
| Bicycling                                 |      |                      |               |               |        |             |             |             |             |                 |
| Football                                  |      |                      |               |               |        |             |             |             |             |                 |
| Swimming                                  |      |                      |               |               |        |             |             |             |             |                 |
| Dancing                                   |      |                      |               |               |        |             |             |             |             |                 |
| Other vigorous activities _____ (specify) |      |                      |               |               |        |             |             |             |             |                 |
| Other moderate activities _____ (specify) |      |                      |               |               |        |             |             |             |             |                 |

**63. (FOR CASES ADD: When you were well) What is/was your average time PER DAY spent sitting or reclining in the last year?**

- 10-29 minutes     30-59 minutes     1 hour     1.1 – 2 hours  
 2.1 – 3 hours     3.1 – 5 hours     5.1 – 7 hours     7+ hours

#### Work & Home Exposures

**64. (FOR CASES ADD: When you were well) How frequently do/did you directly handle the following substances in the last year?**

|                                  | Never | 1-3 days per month | 1 day per week | 2-4 days per week | 5-6 days per week | Everyday |
|----------------------------------|-------|--------------------|----------------|-------------------|-------------------|----------|
| Burning waste (trash)            |       |                    |                |                   |                   |          |
| Asbestos (from construction)     |       |                    |                |                   |                   |          |
| Insecticides/pesticides          |       |                    |                |                   |                   |          |
| Wastes from operating industries |       |                    |                |                   |                   |          |

#### Cancer Awareness

**65. Prior to today, had you ever heard of cancer?**

- Yes     No (end of questionnaire)

↓ If yes

**65a. Prior to today, which cancers had you heard of? (Select as many as may apply.)**  Colon/rectum     Breast     Cervix  
 Prostate     liver     lung     Other \_\_\_\_\_ (specify)

**65b. Do you know anyone who has had cancer?**  Yes     No

**65c. Prior to today, what things did you think affect a person's chance of developing cancer? (Select as many as may apply.)**

- Do not know/Not sure     Chance     Depends on the cancer     Genetics/family history     Body size  
 Lifestyle (e.g., smoking, alcohol)     Diet     Environment (e.g., living or working conditions)     Other \_\_\_\_\_ (specify)
